# Supplementary material for: Determination of hepatitis C virus subtype prevalent in Sindh, Pakistan: a phylogenetic analysis
Source: PubMed Central journal article supplement (PMC11096182; doi:10.1038/s41598-024-59342-7), 2024-05-15

Threshold = 39

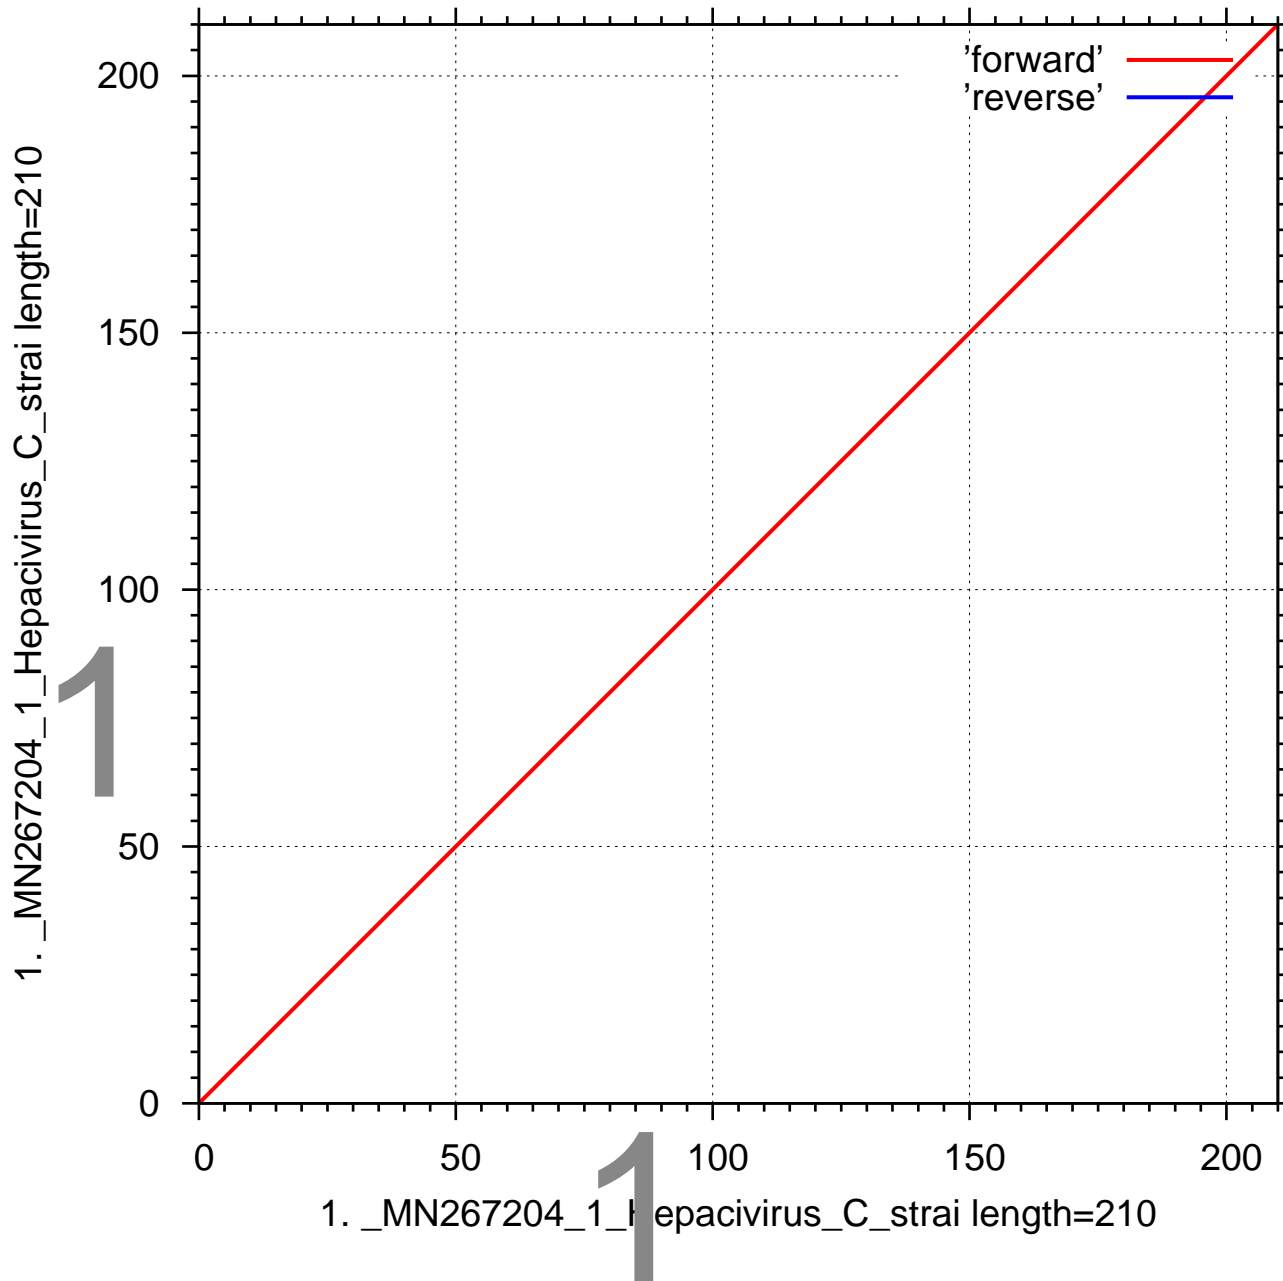

Threshold = 39

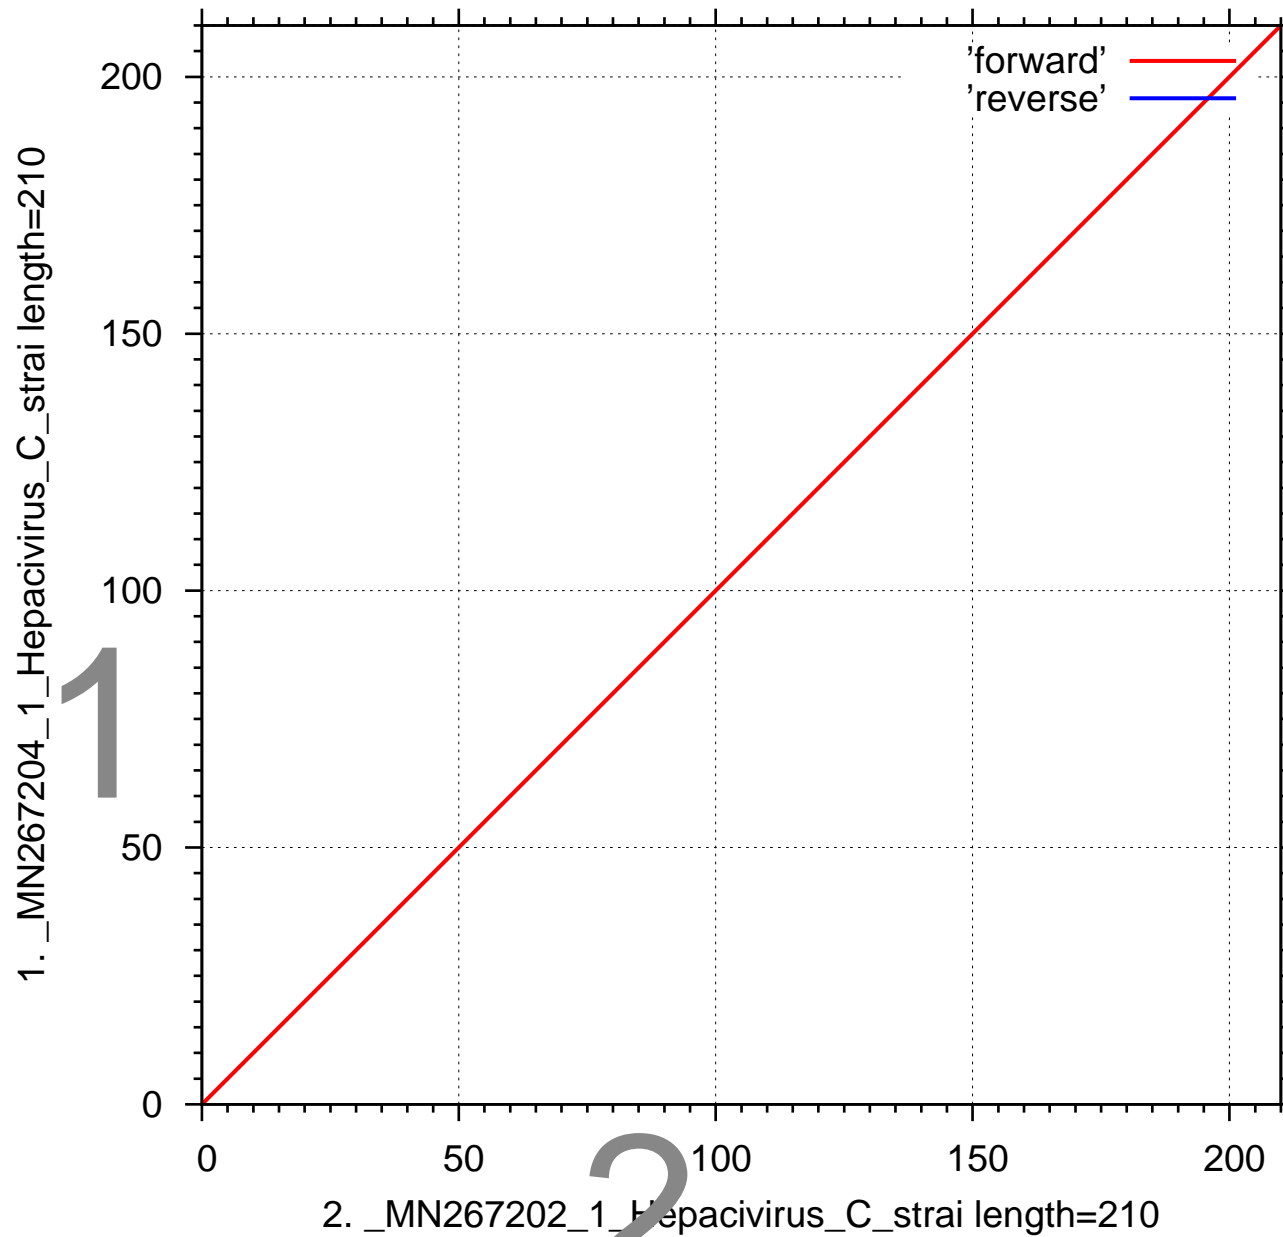

Threshold = 39

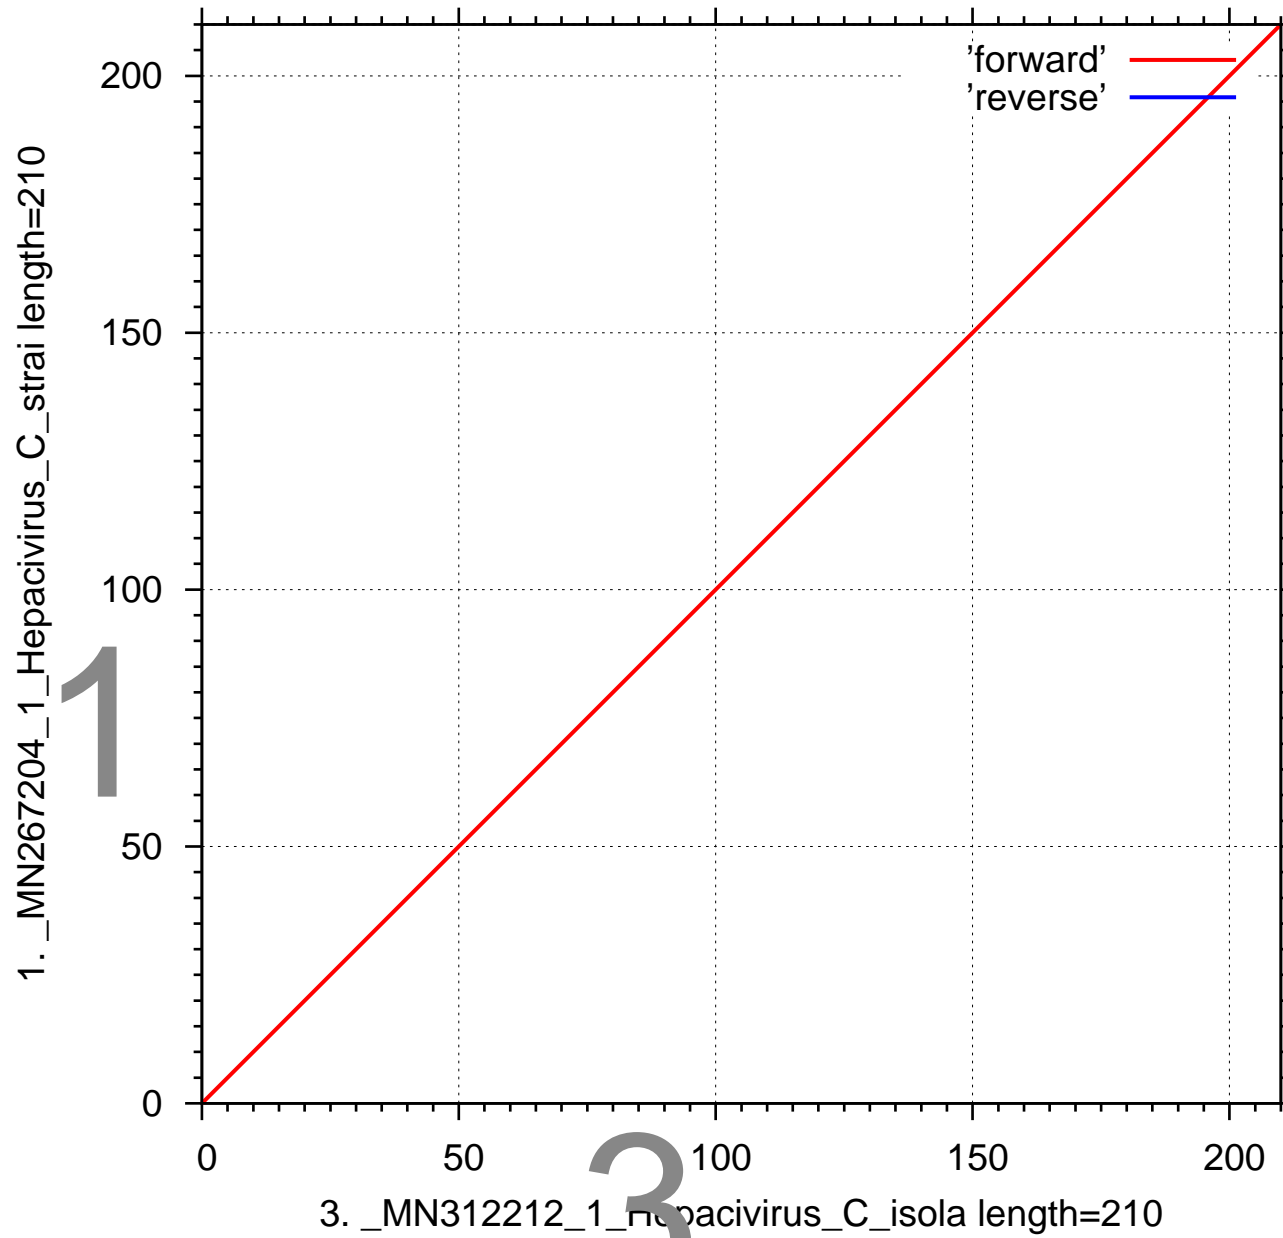

Threshold = 39

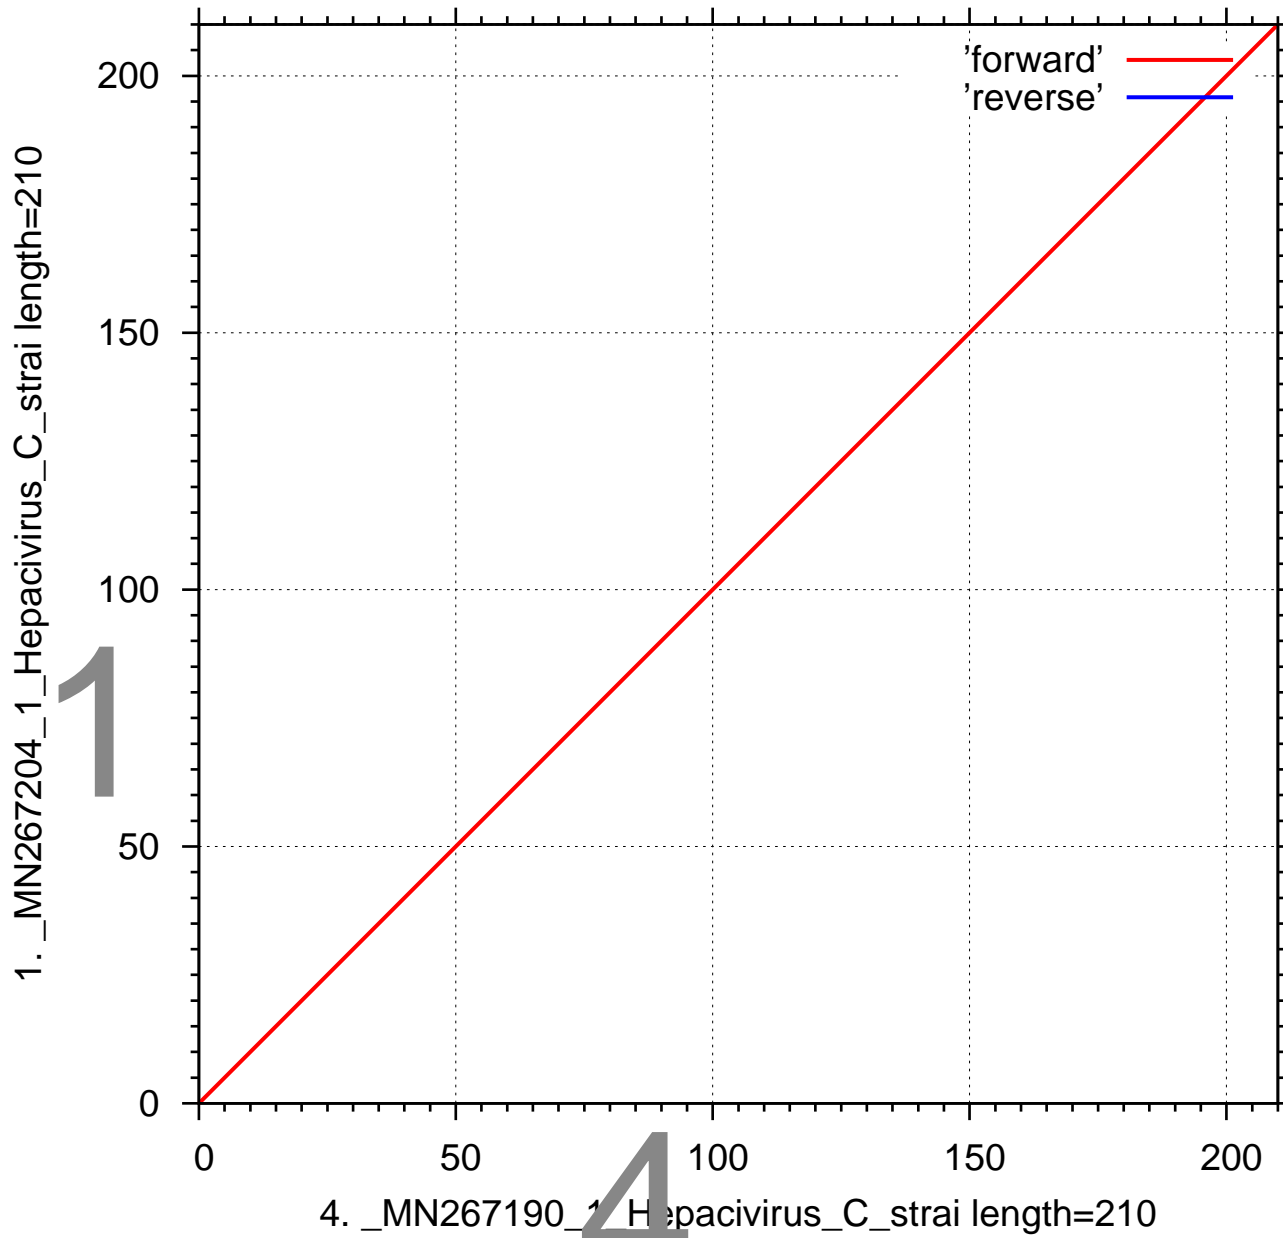

Threshold = 39

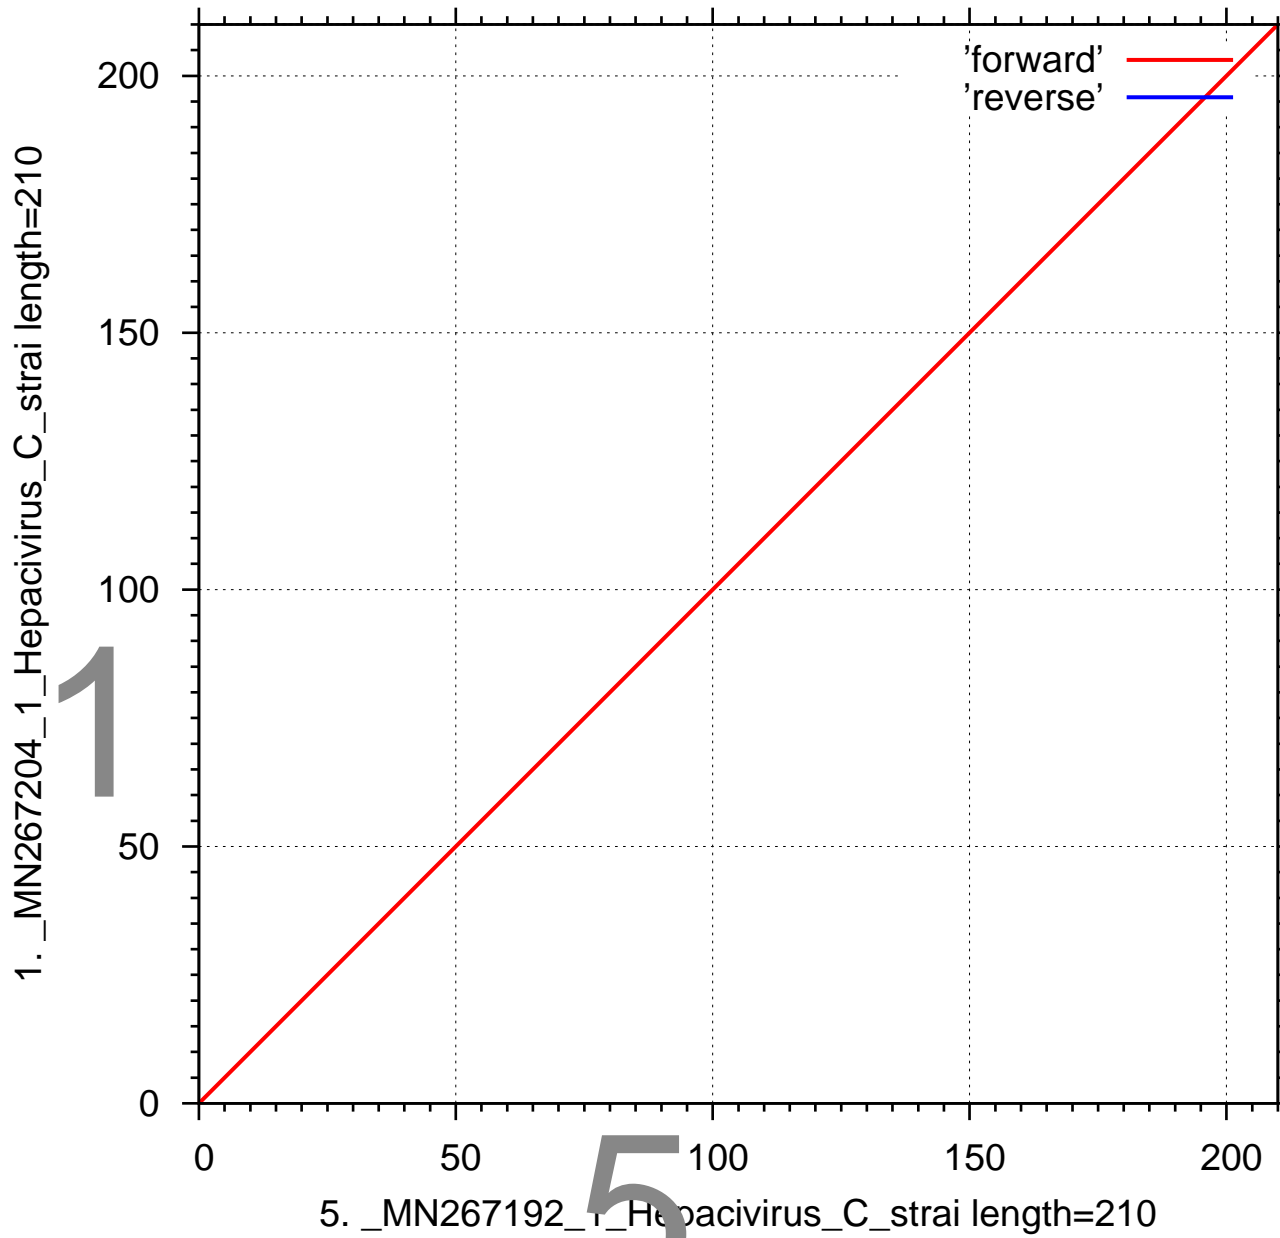

Threshold = 39

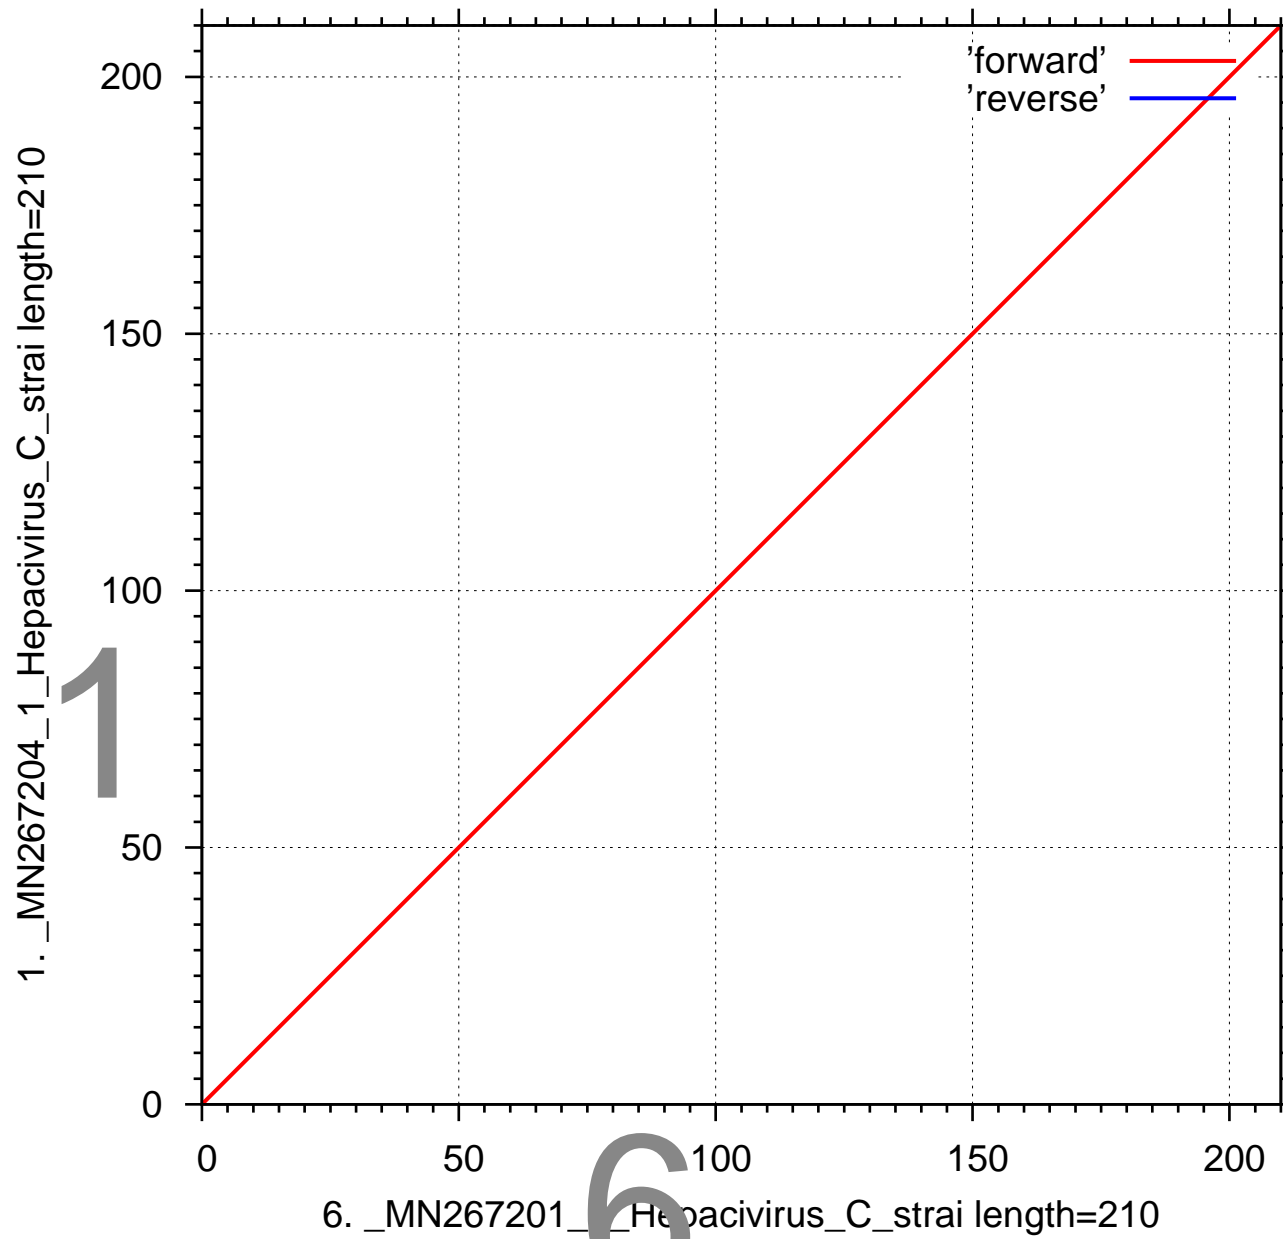

Threshold = 39

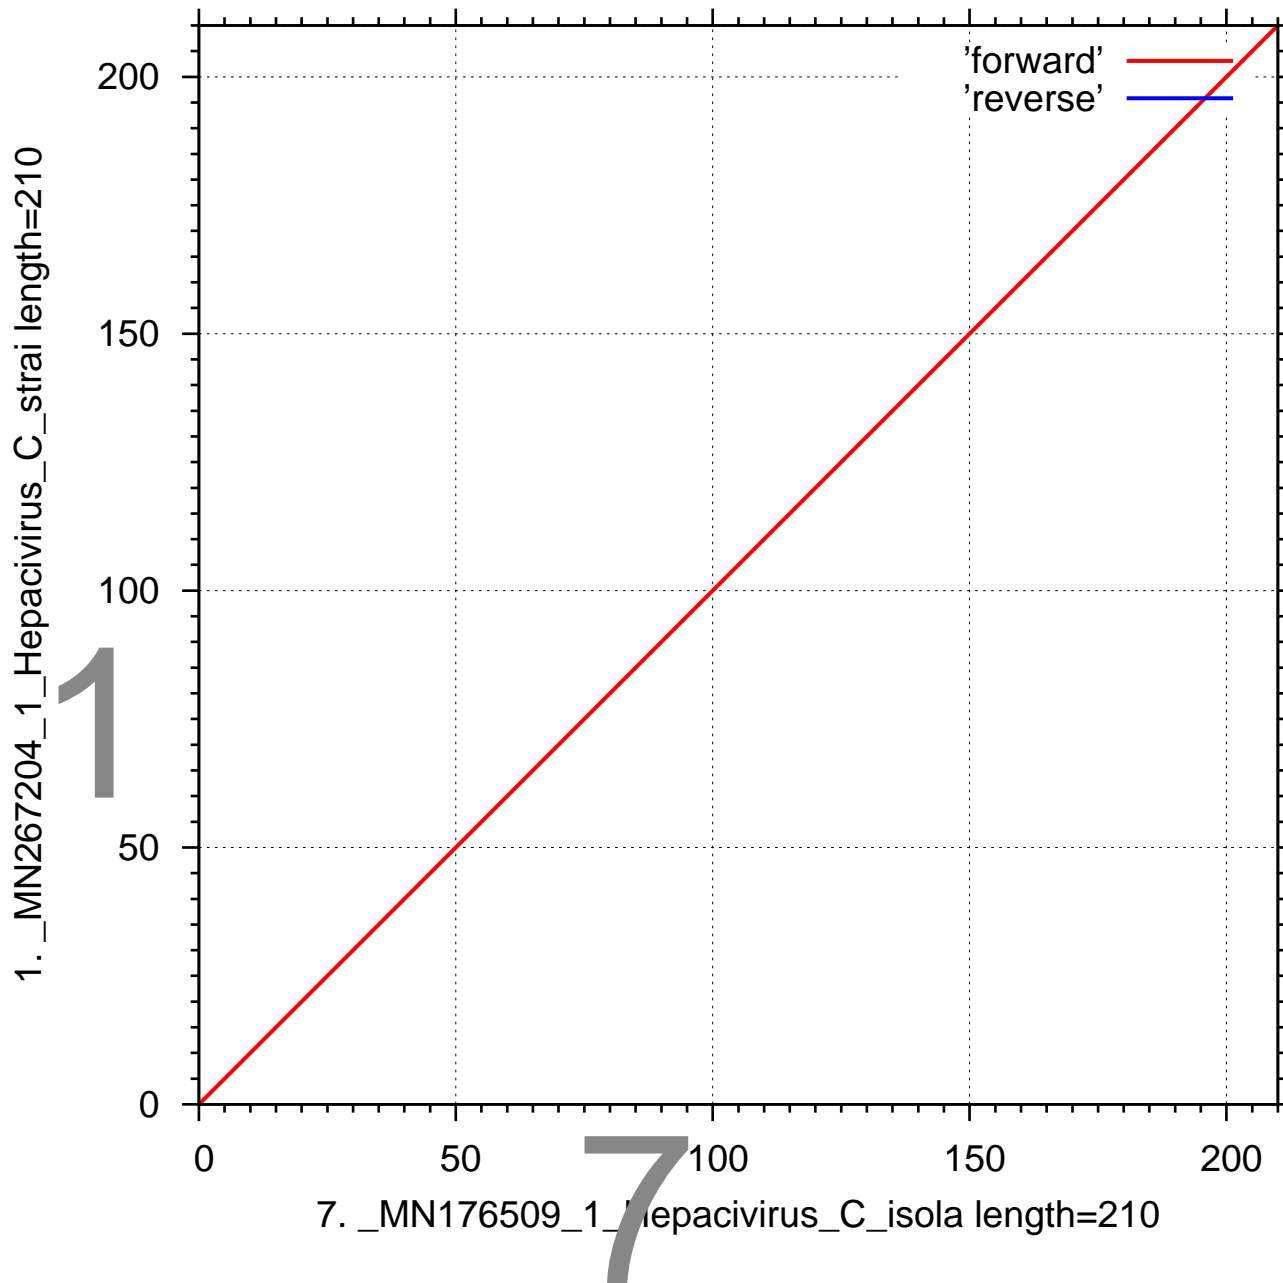

Threshold = 39

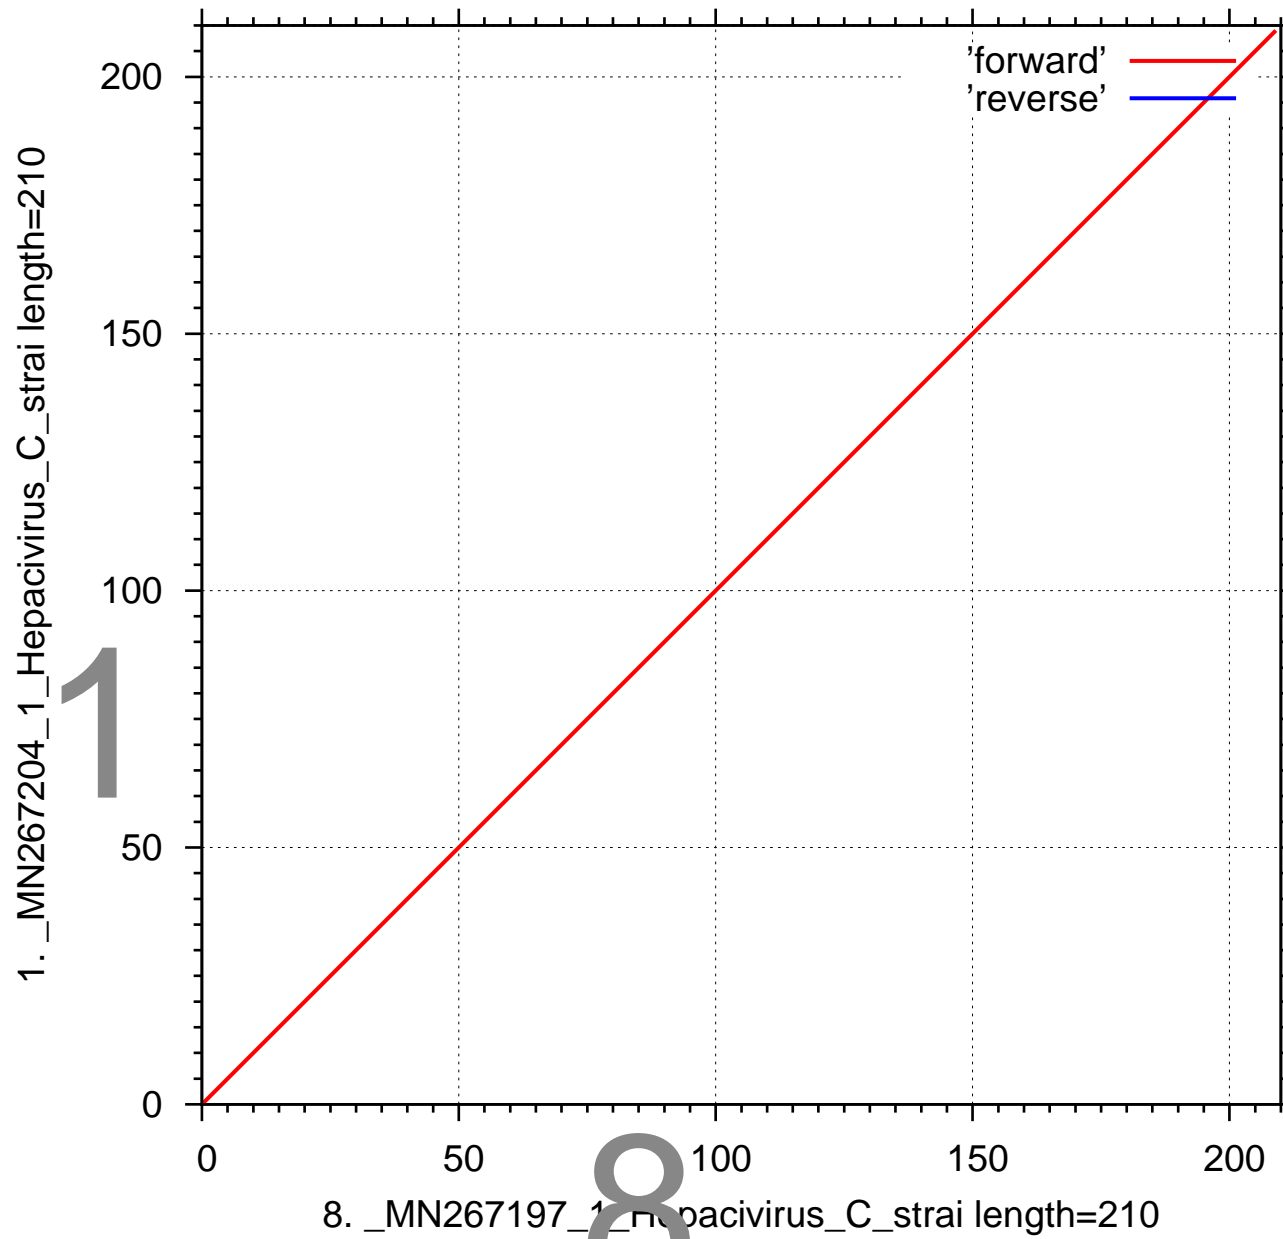



Threshold = 39

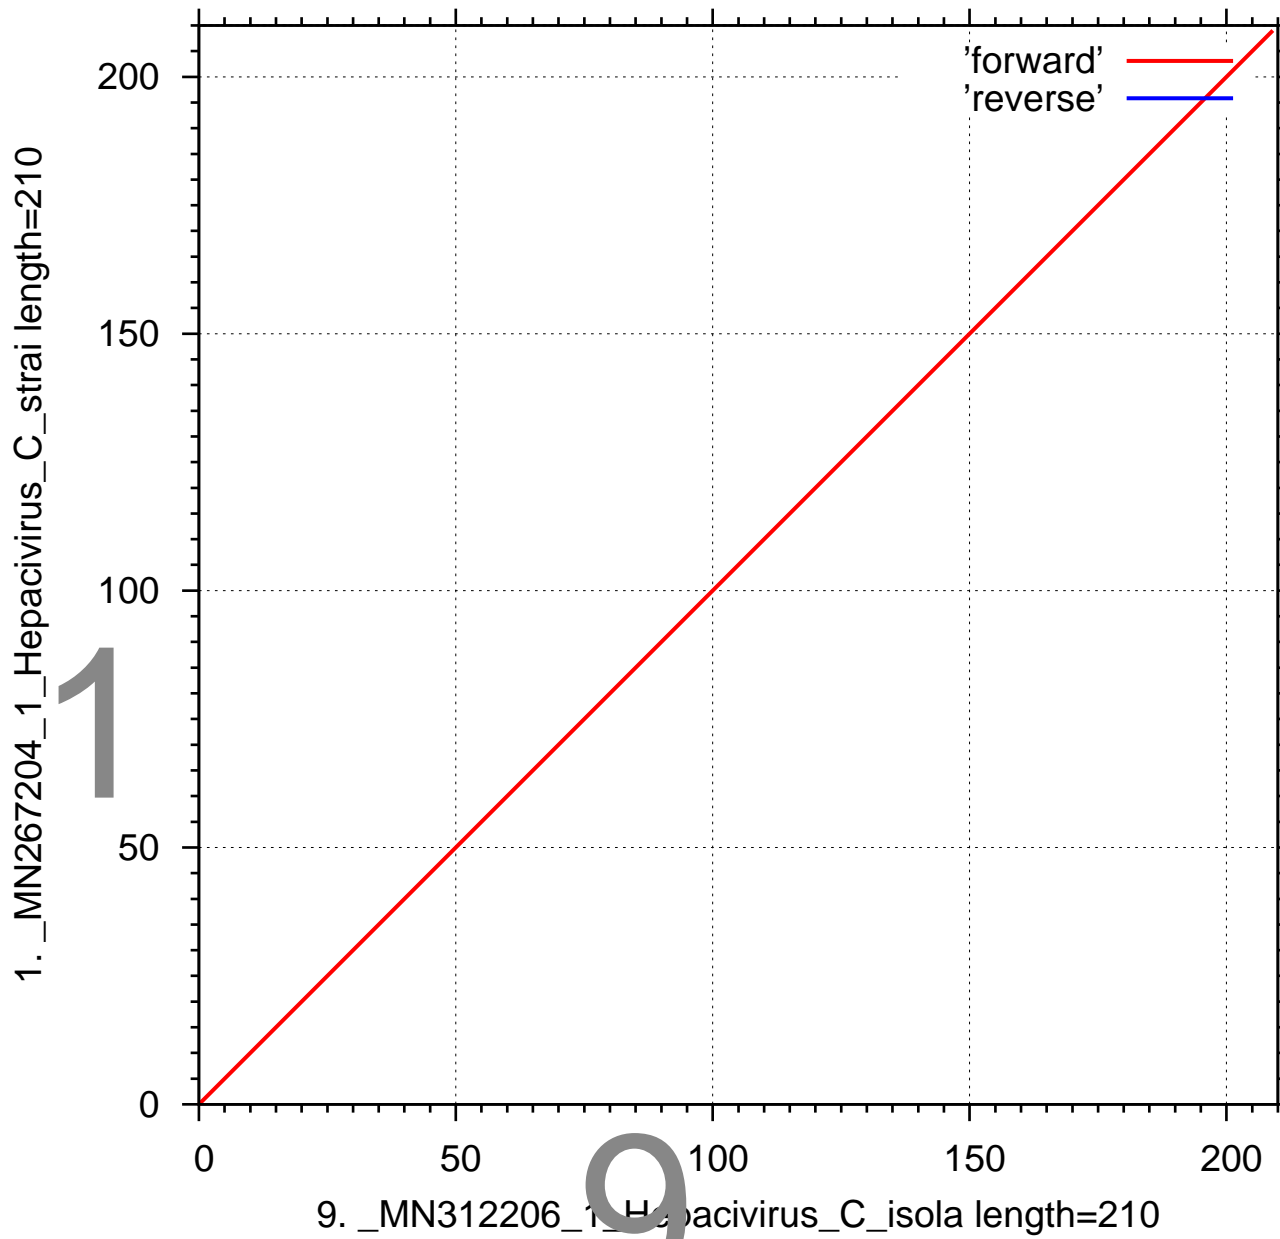

Threshold = 39

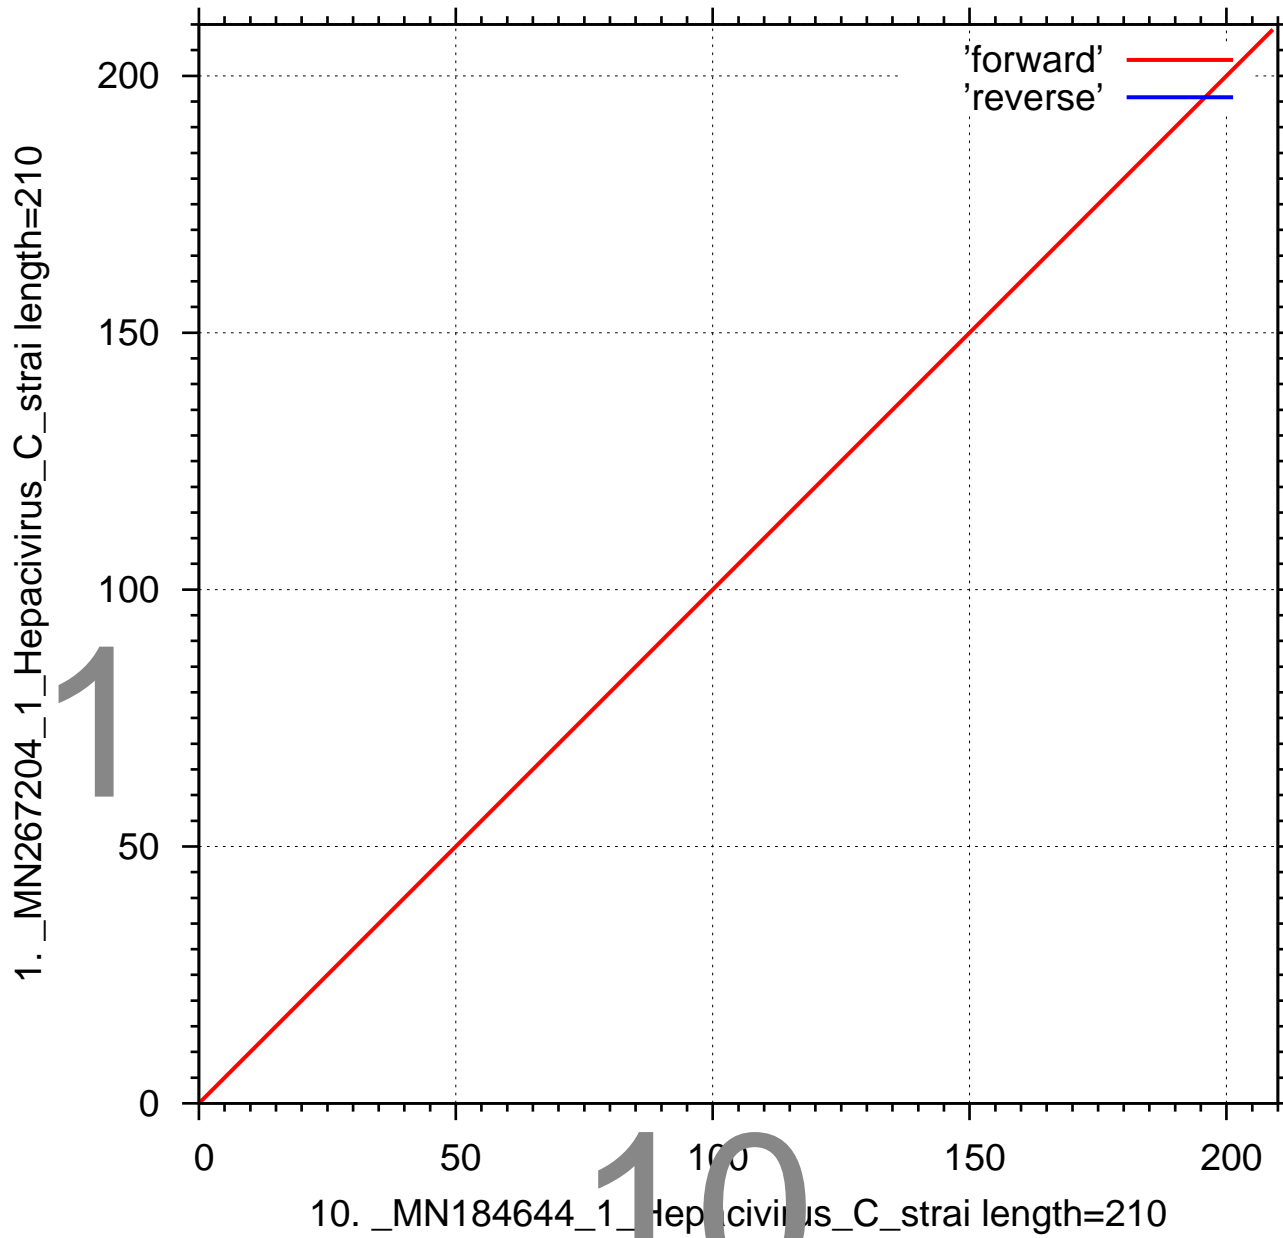

Threshold = 39

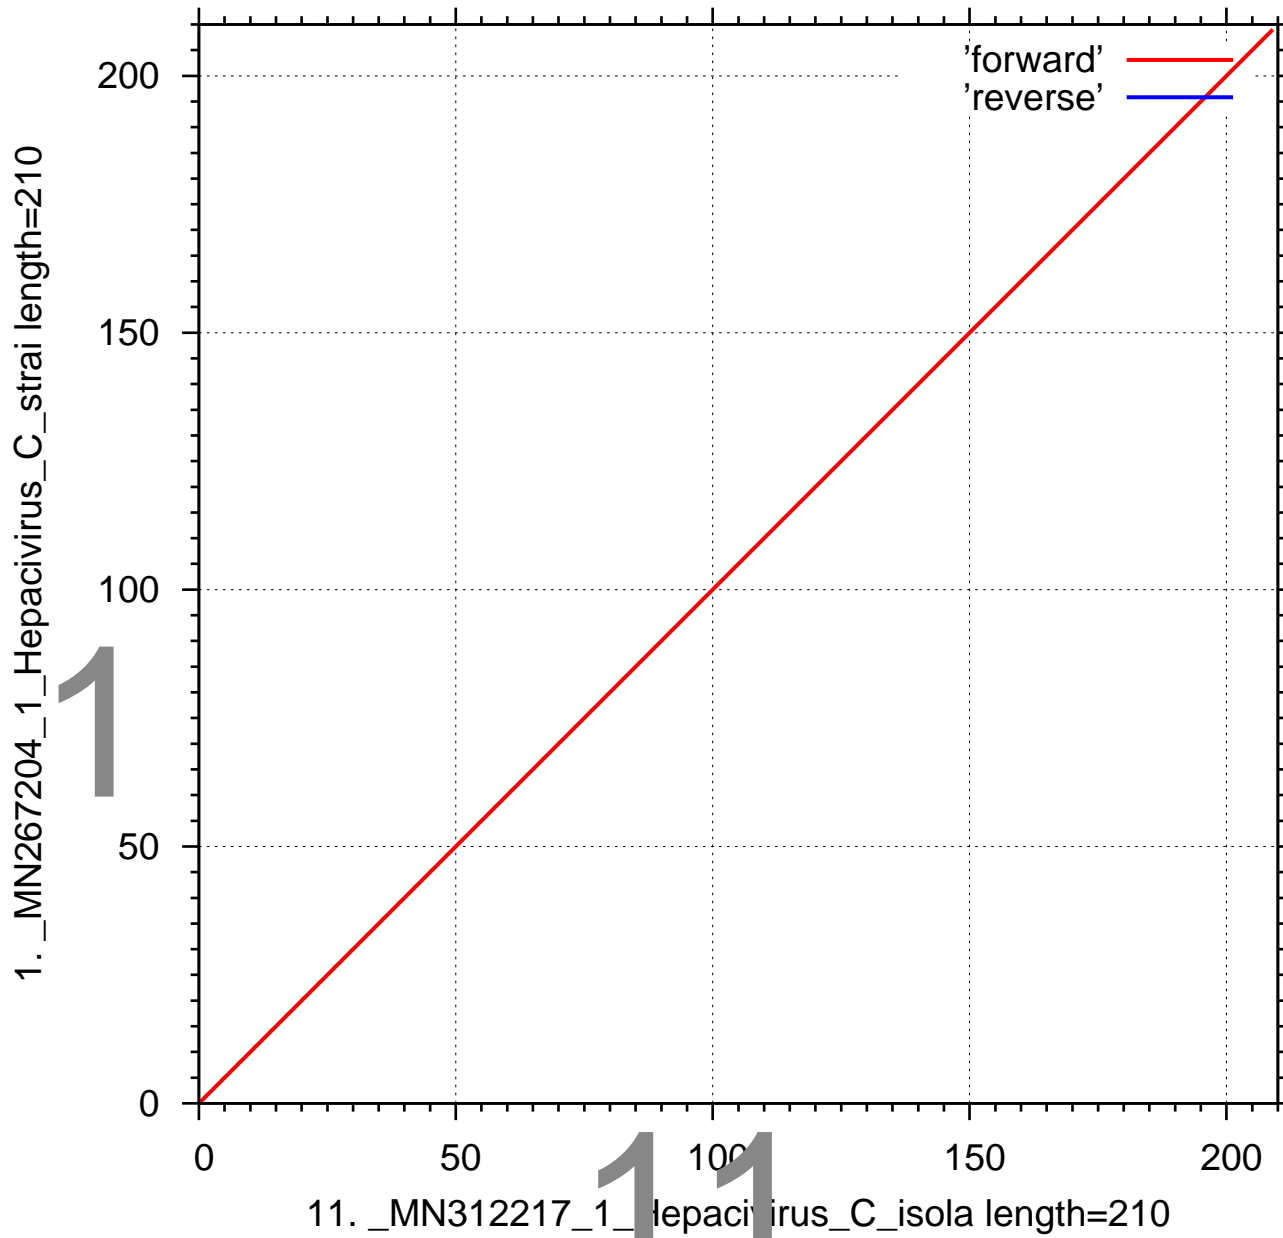

Threshold = 39

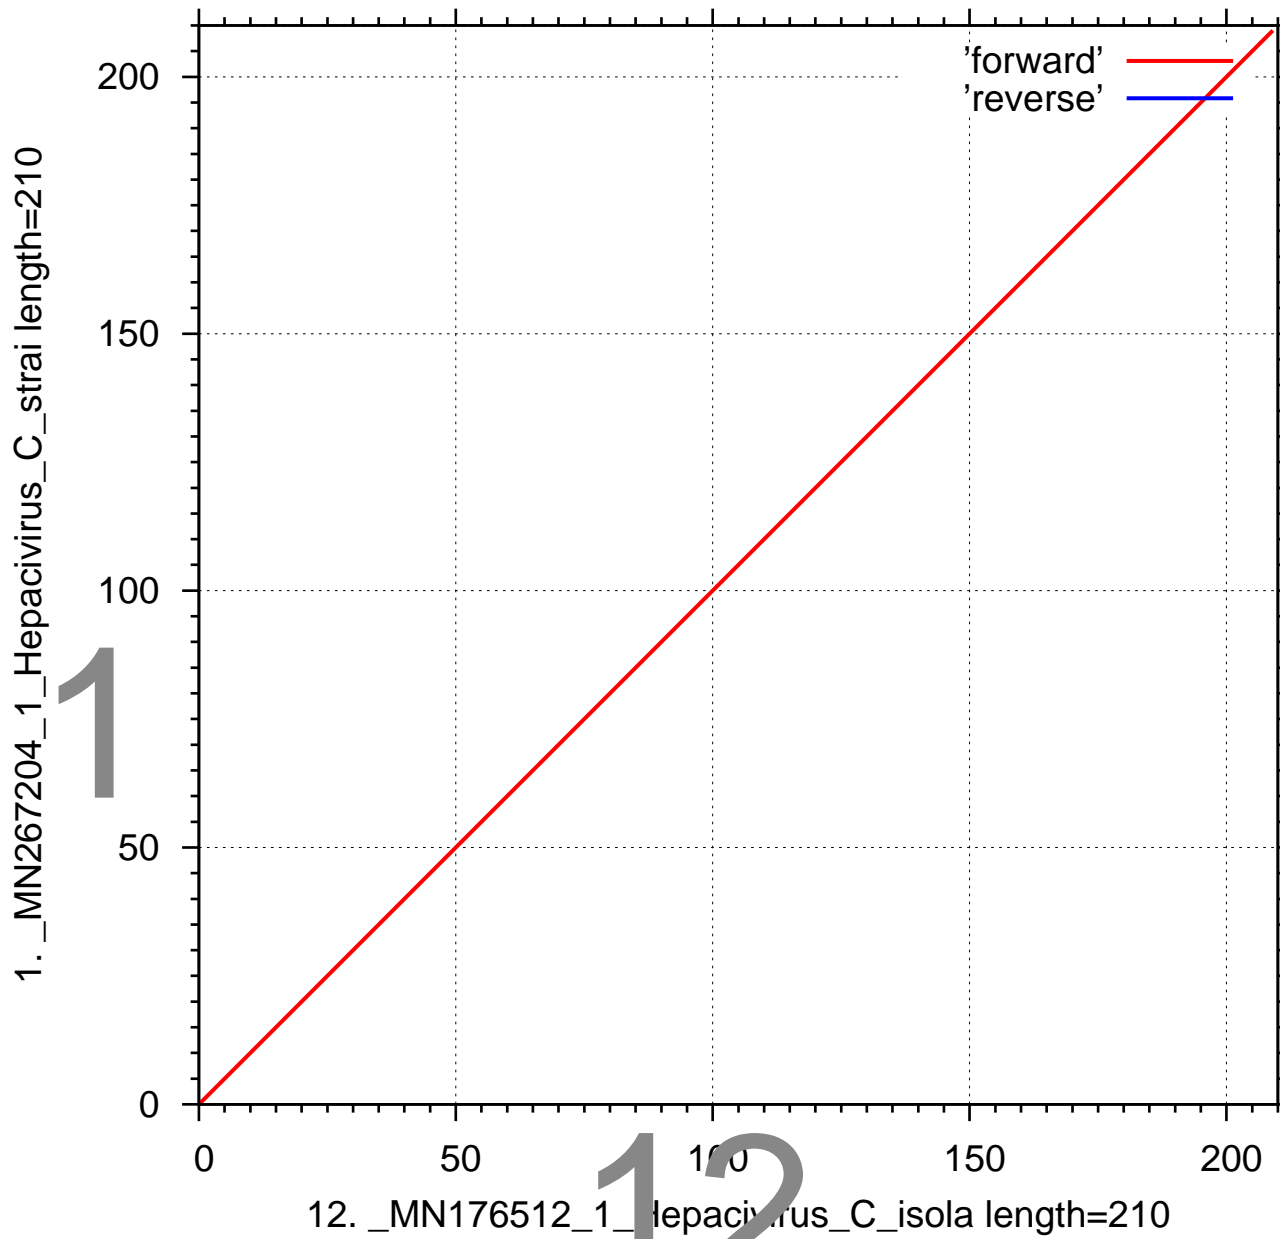

Threshold = 39

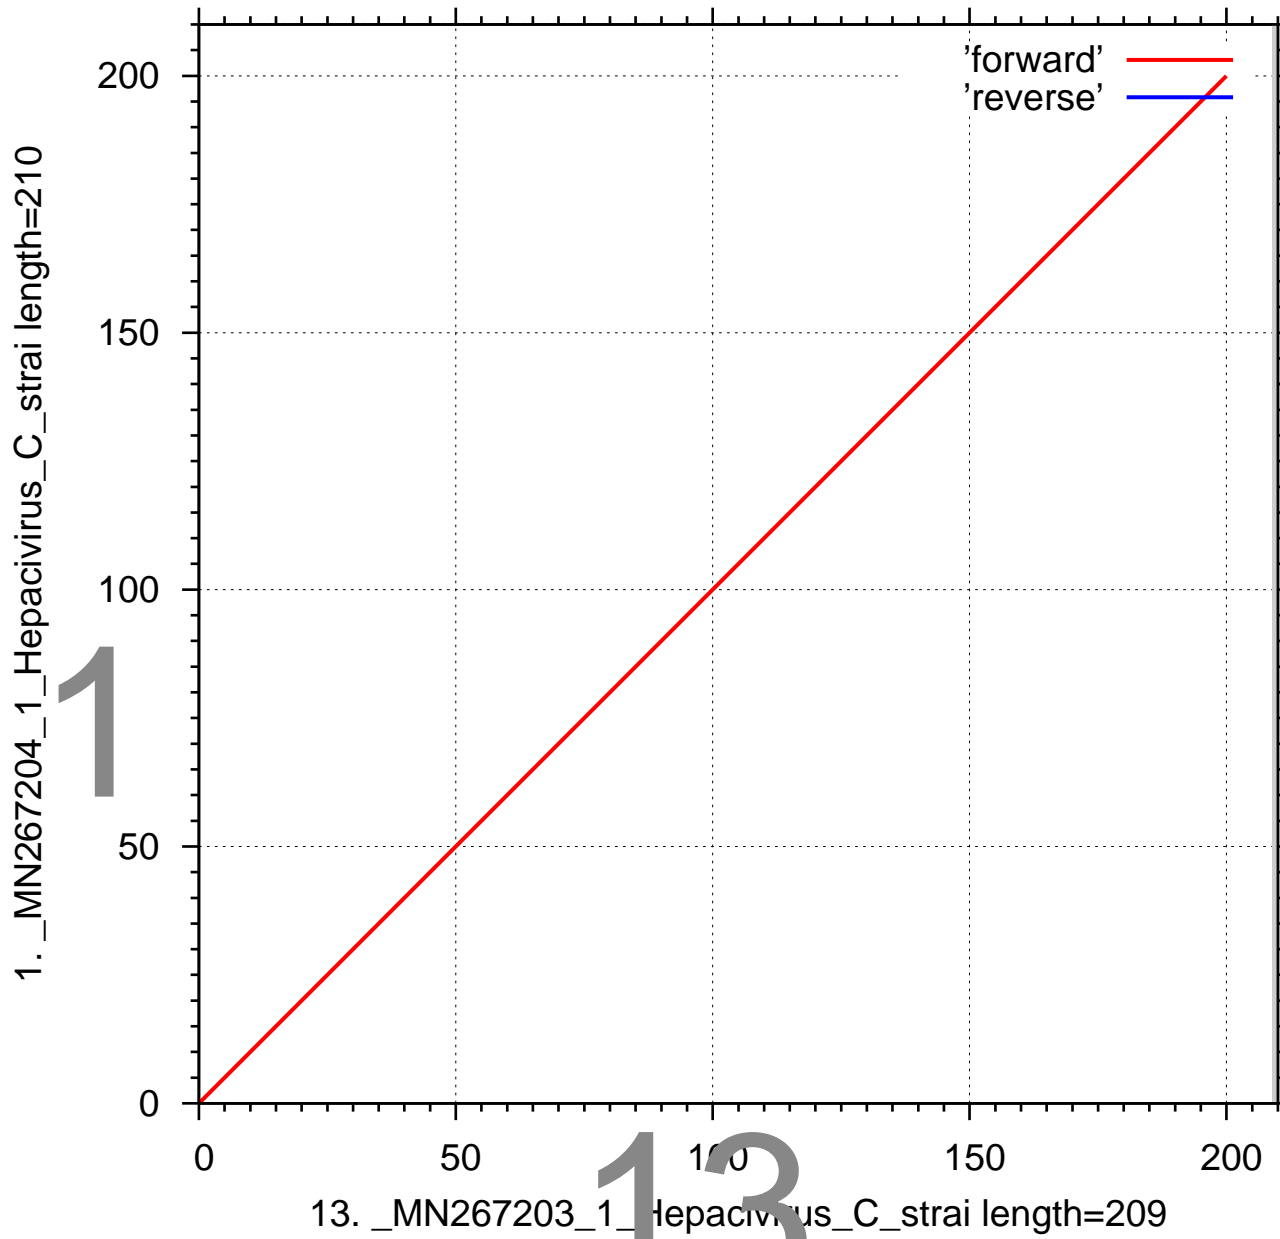

Threshold = 39

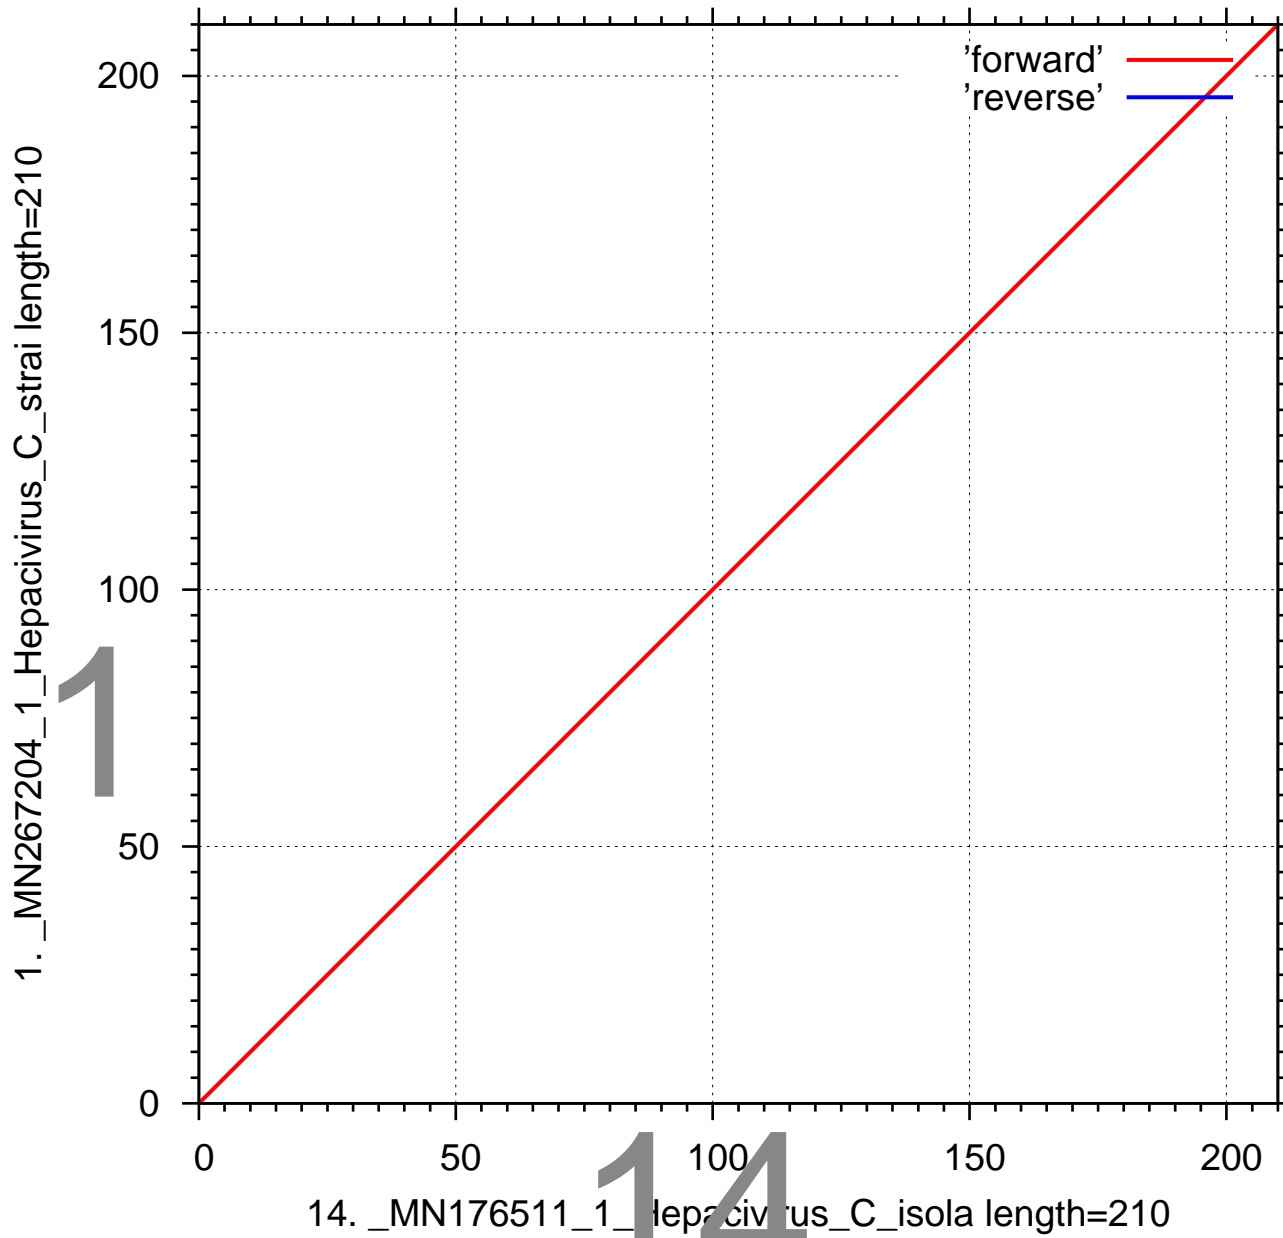

Threshold = 39

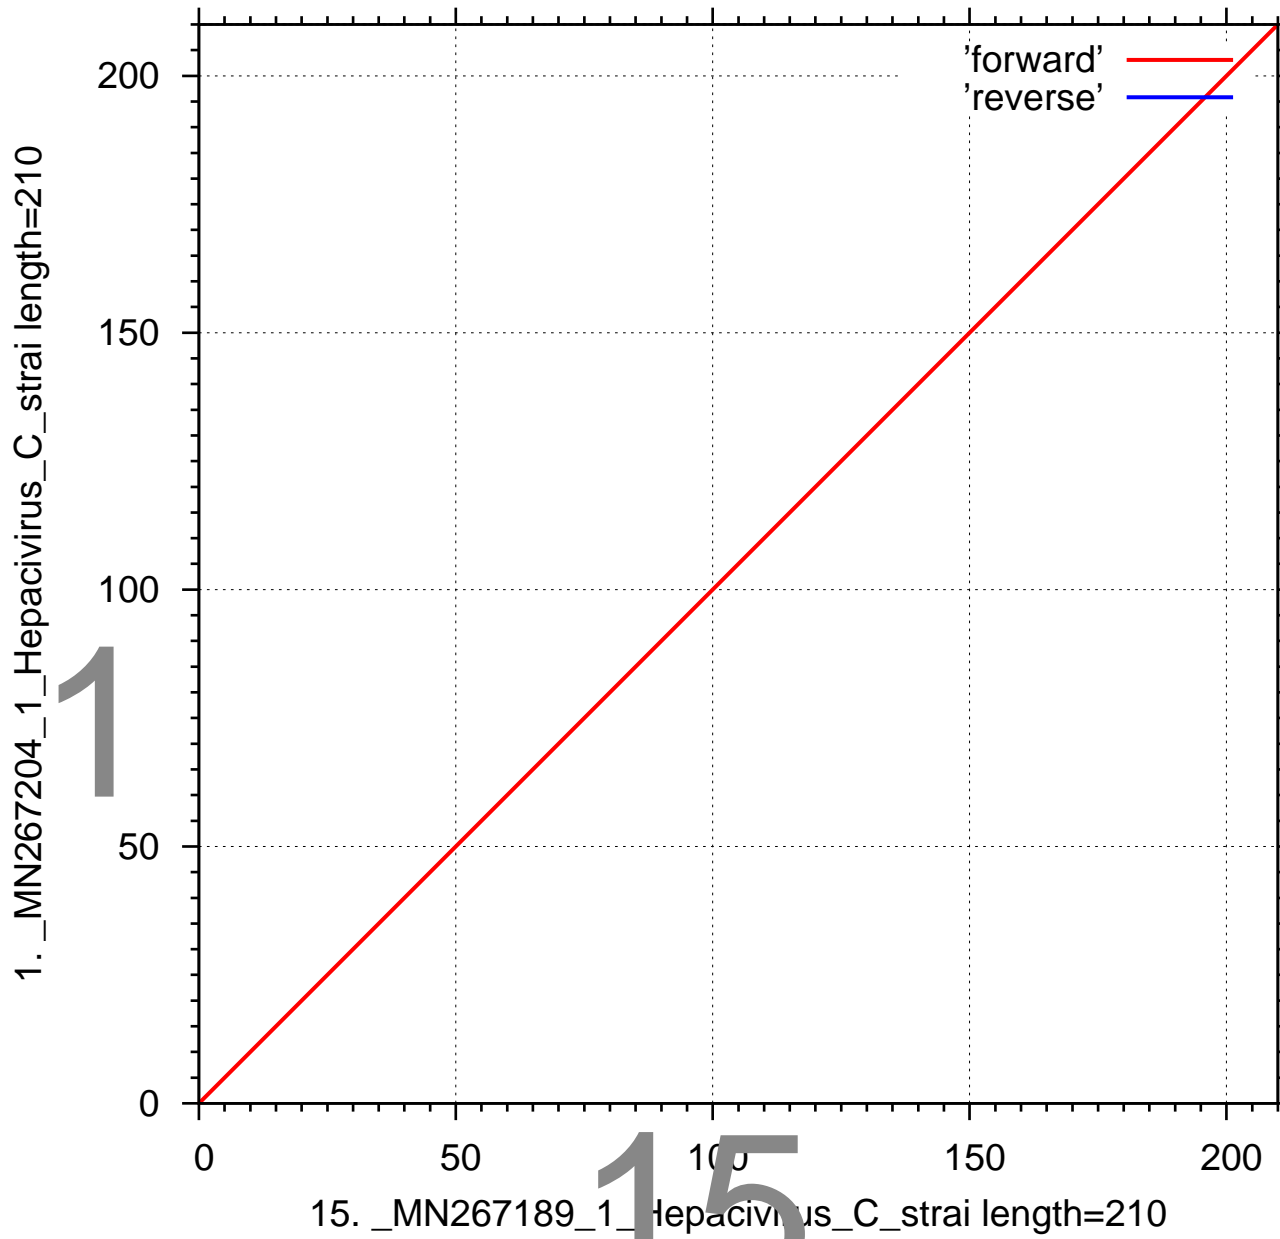

1

15

Threshold = 39

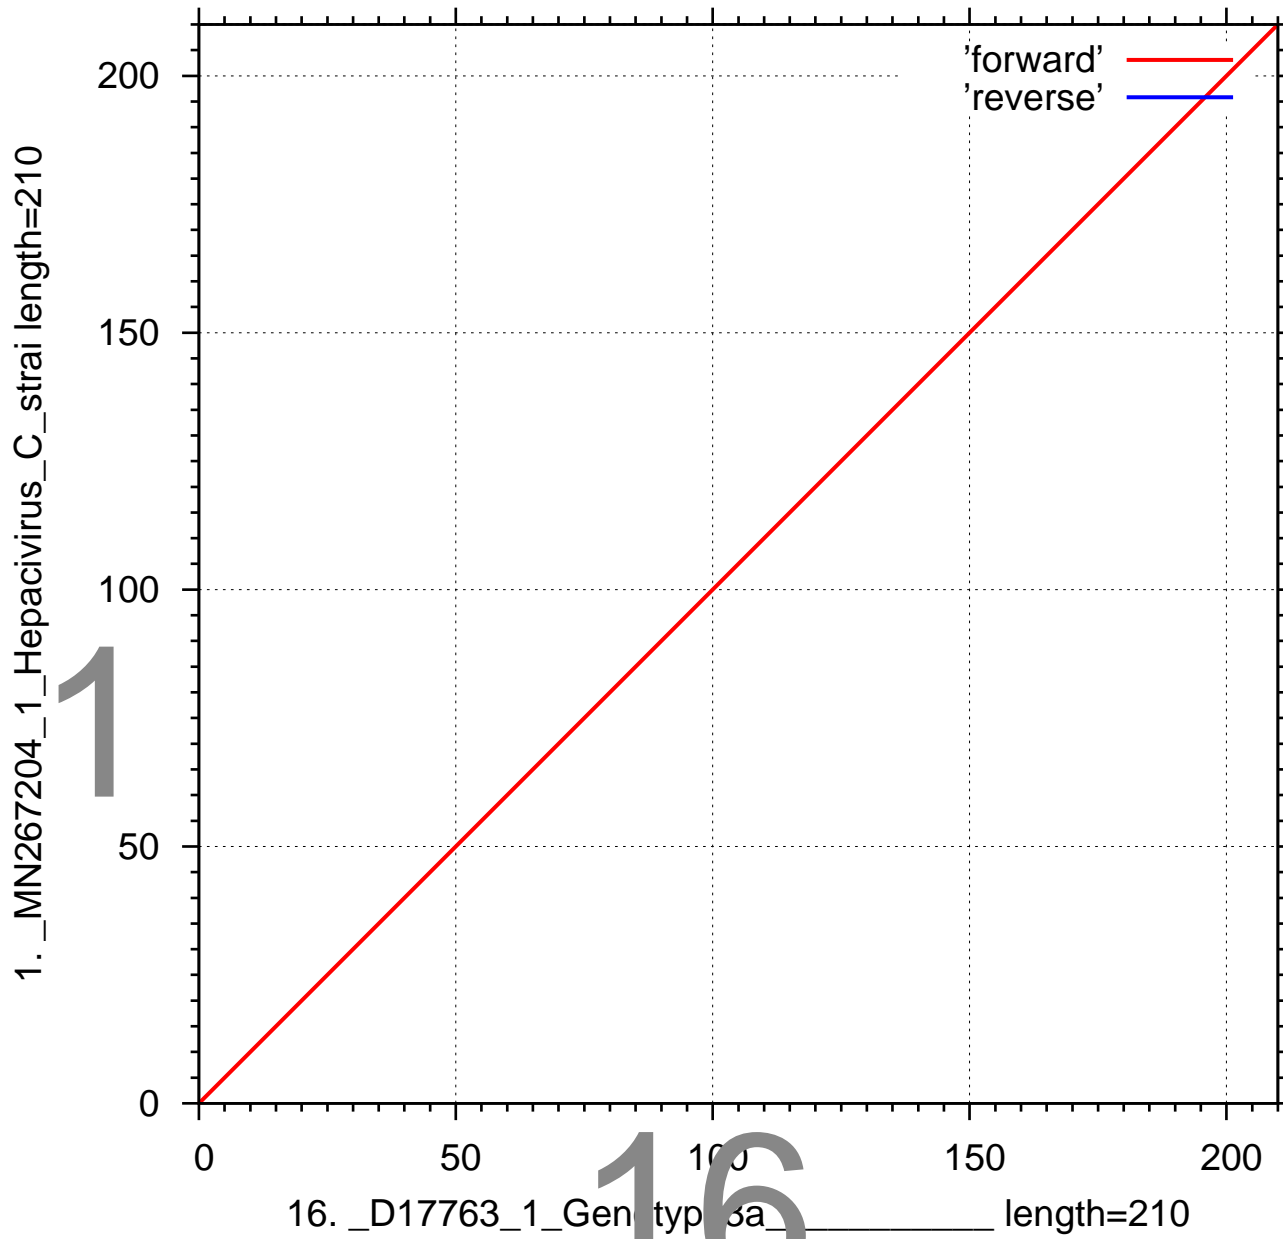



Threshold = 39

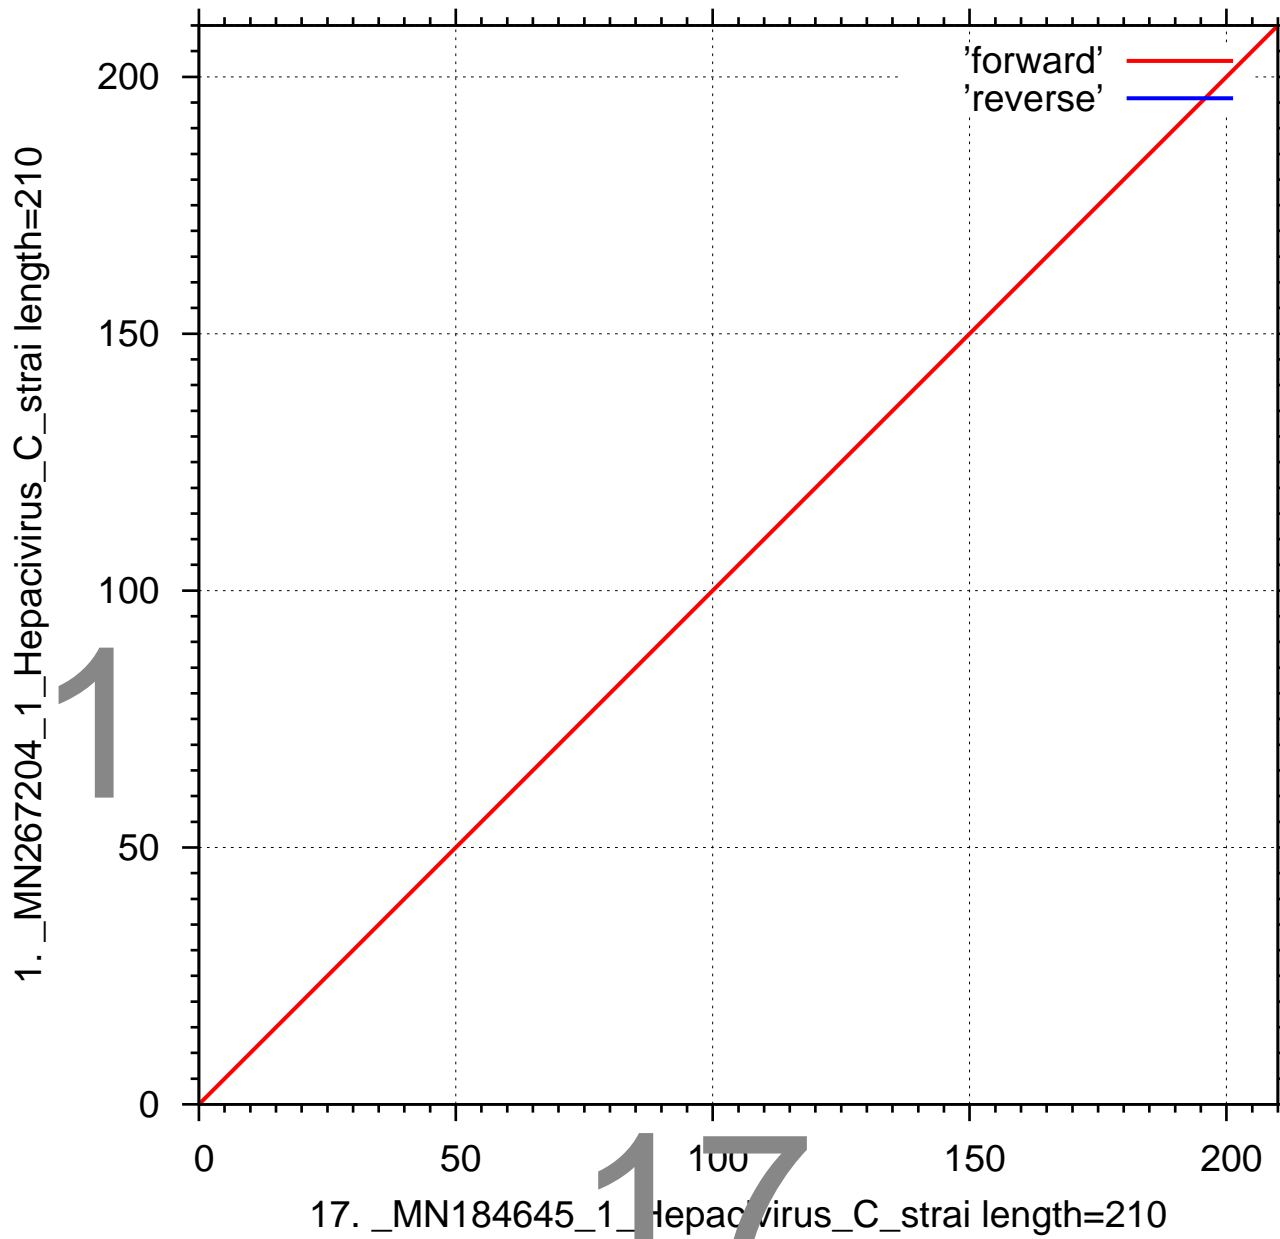

Threshold = 39

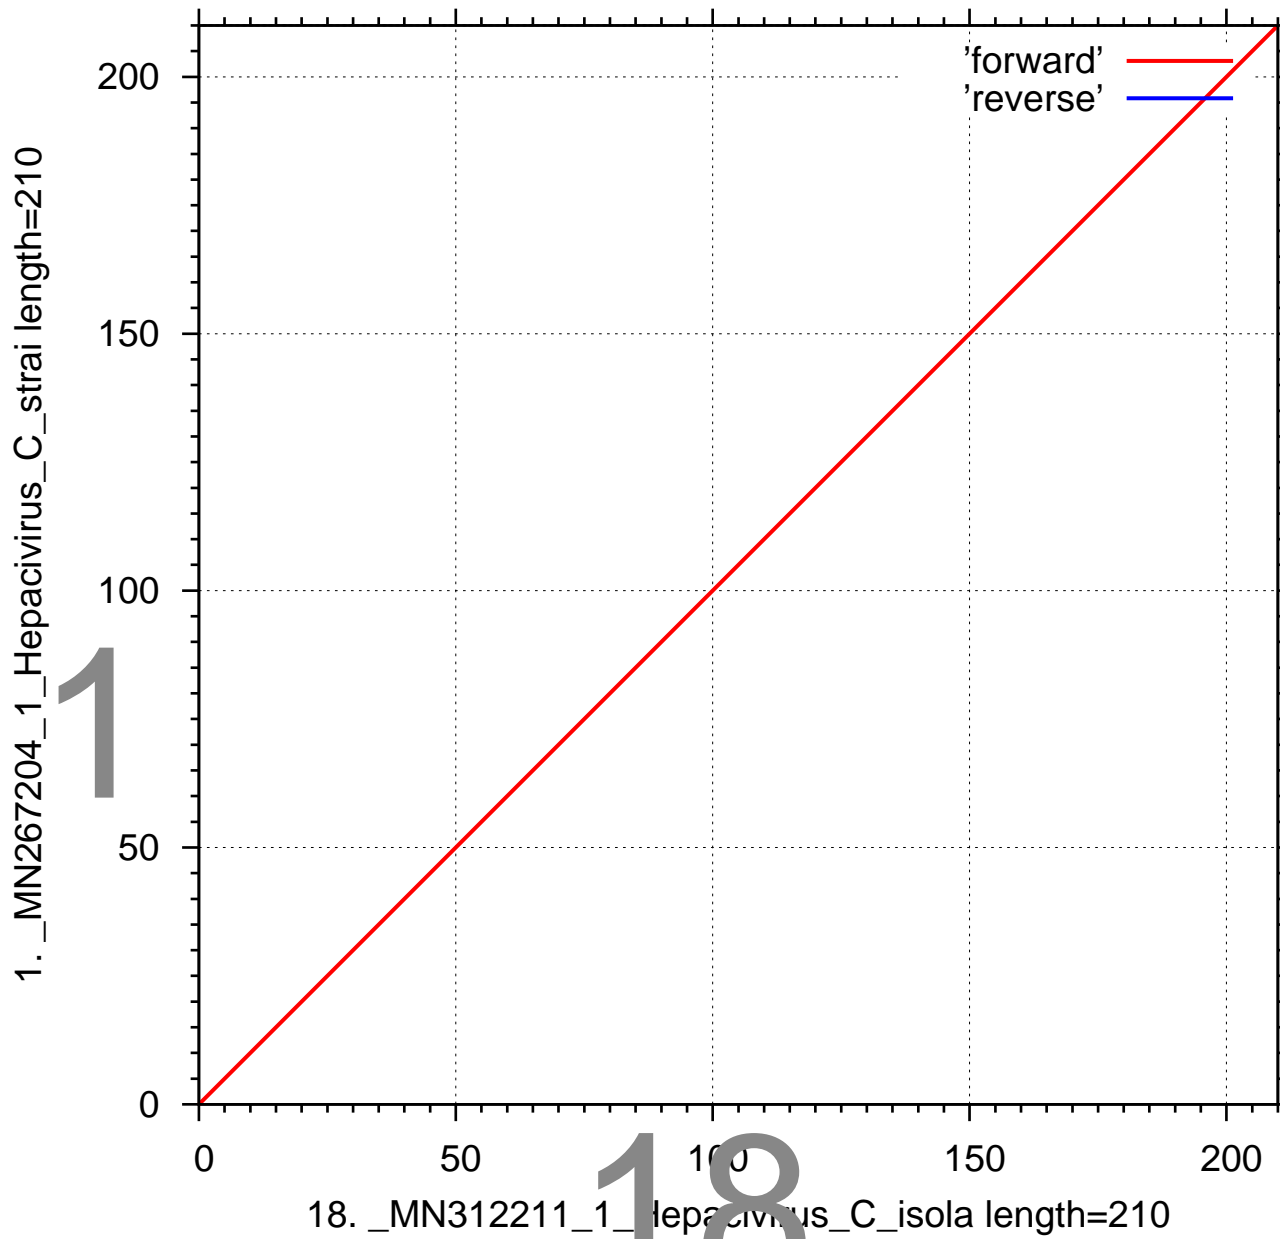

Threshold = 39

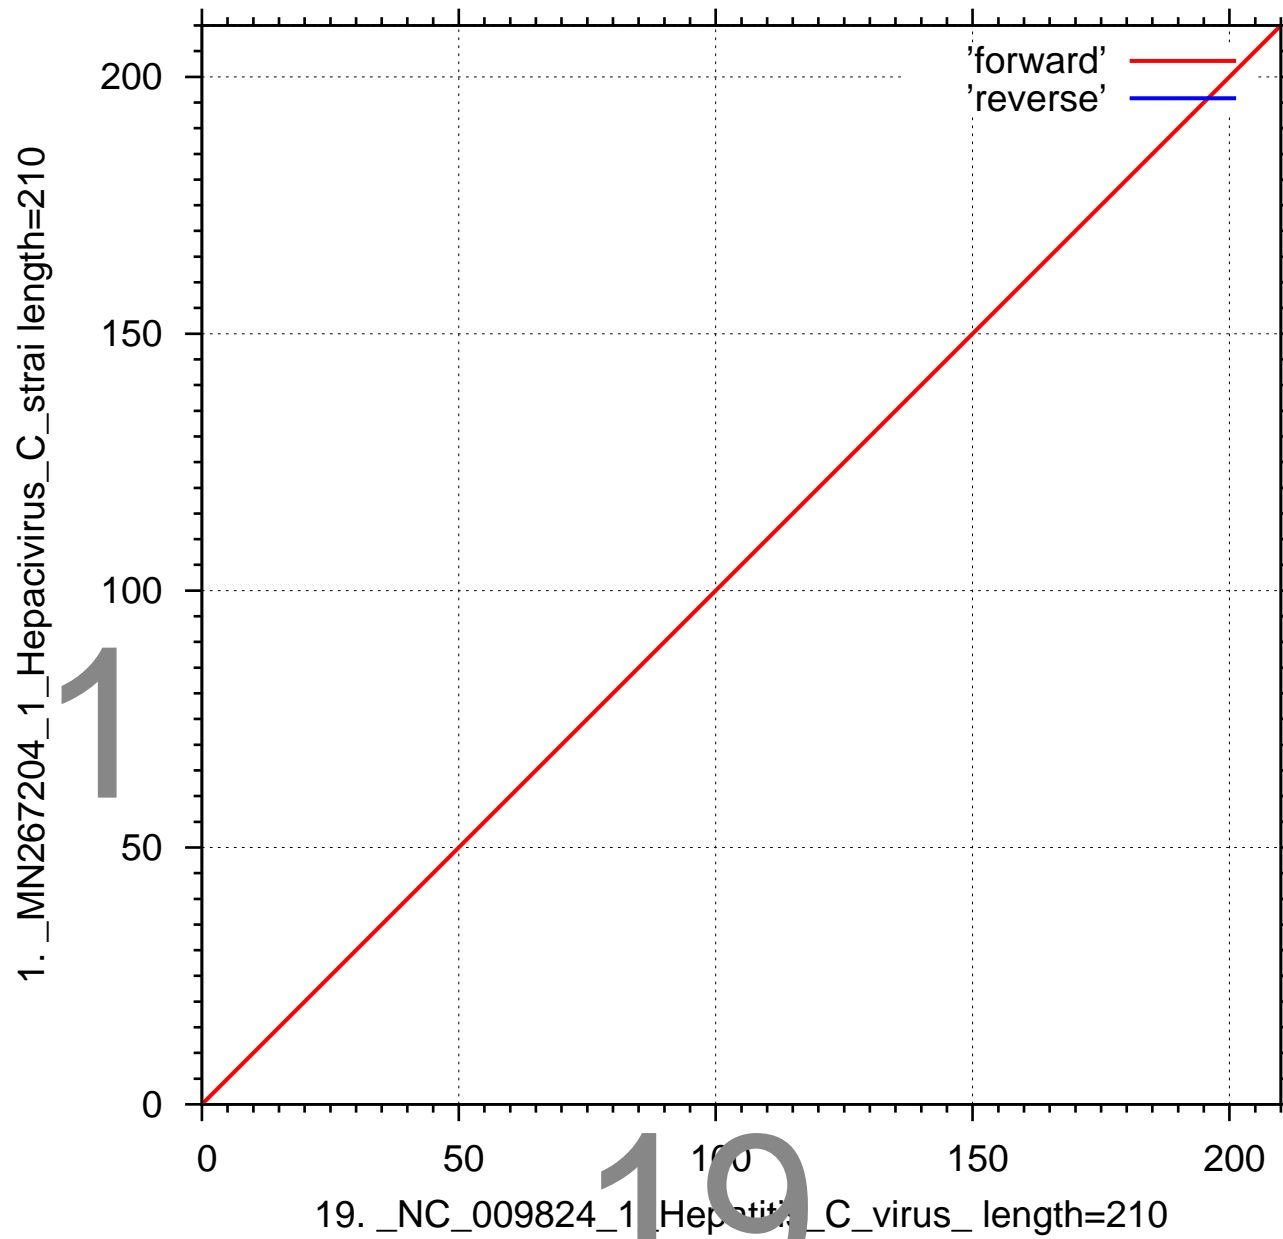

Threshold = 39

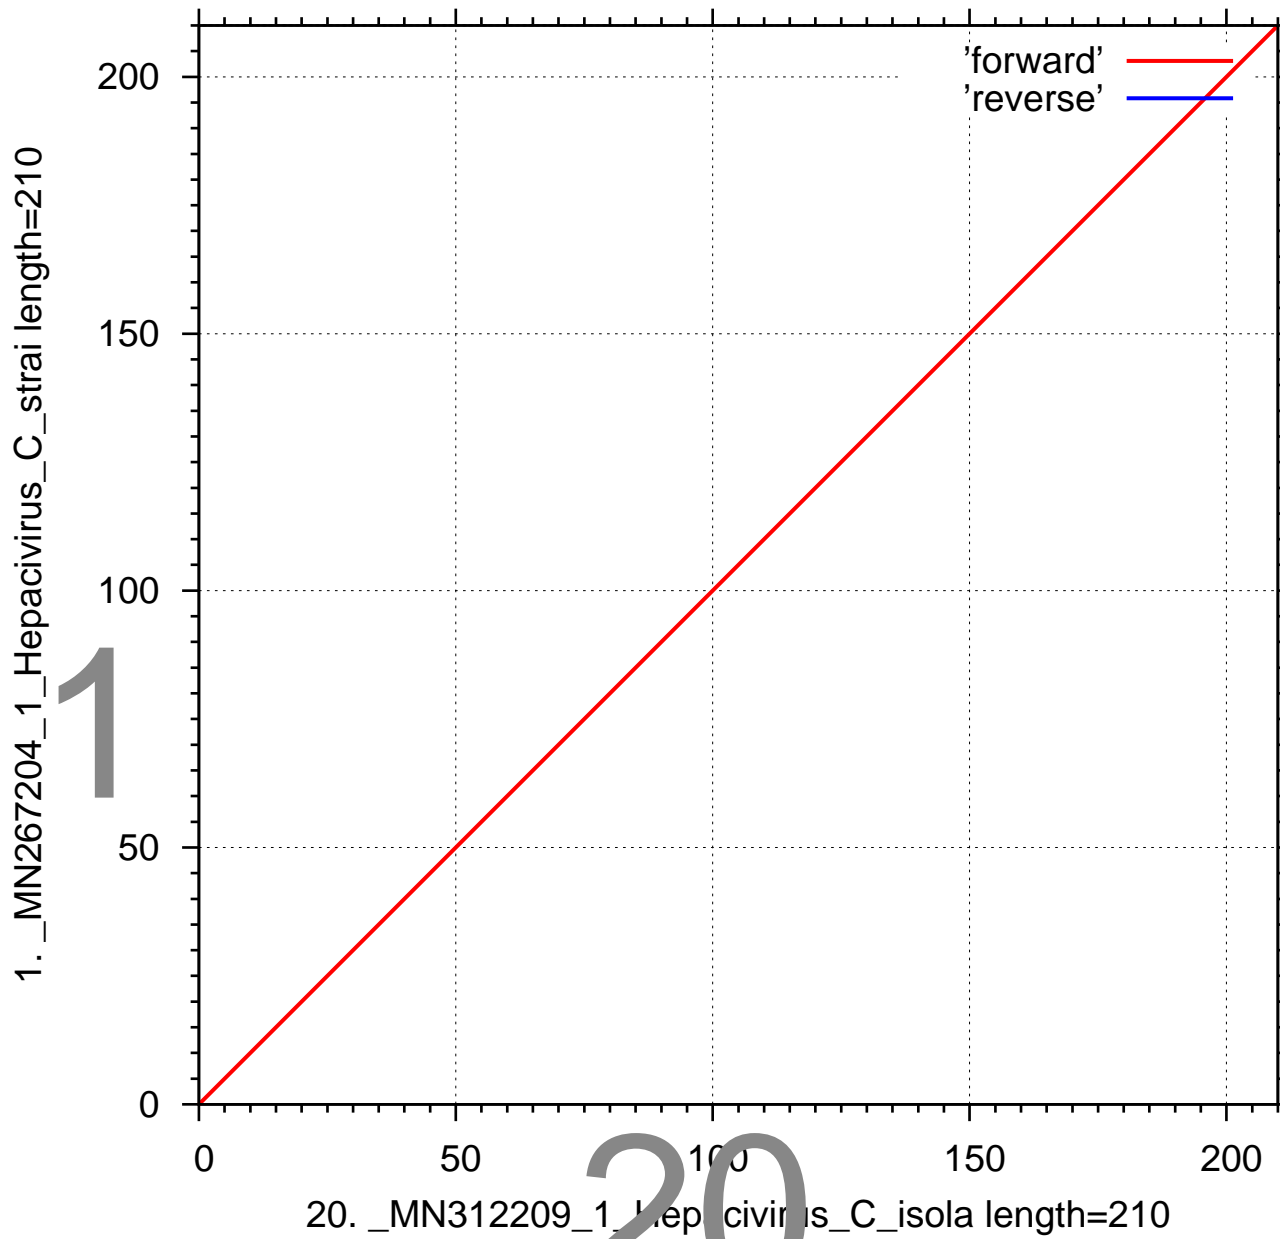

Threshold = 39

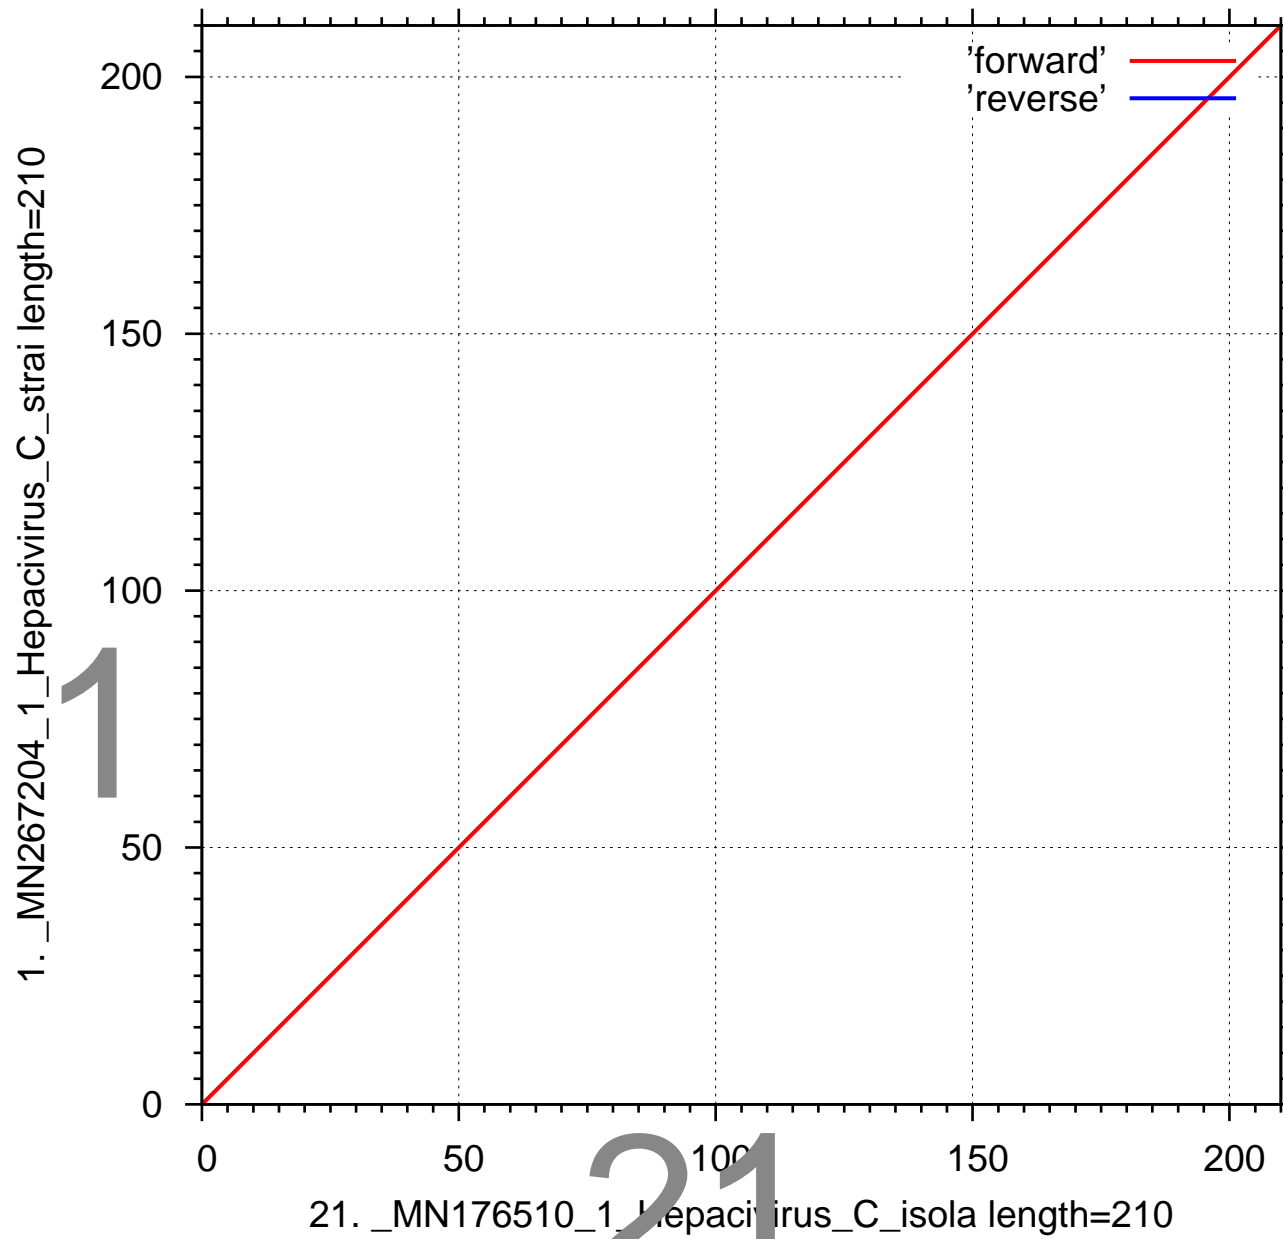

1

21

Threshold = 39

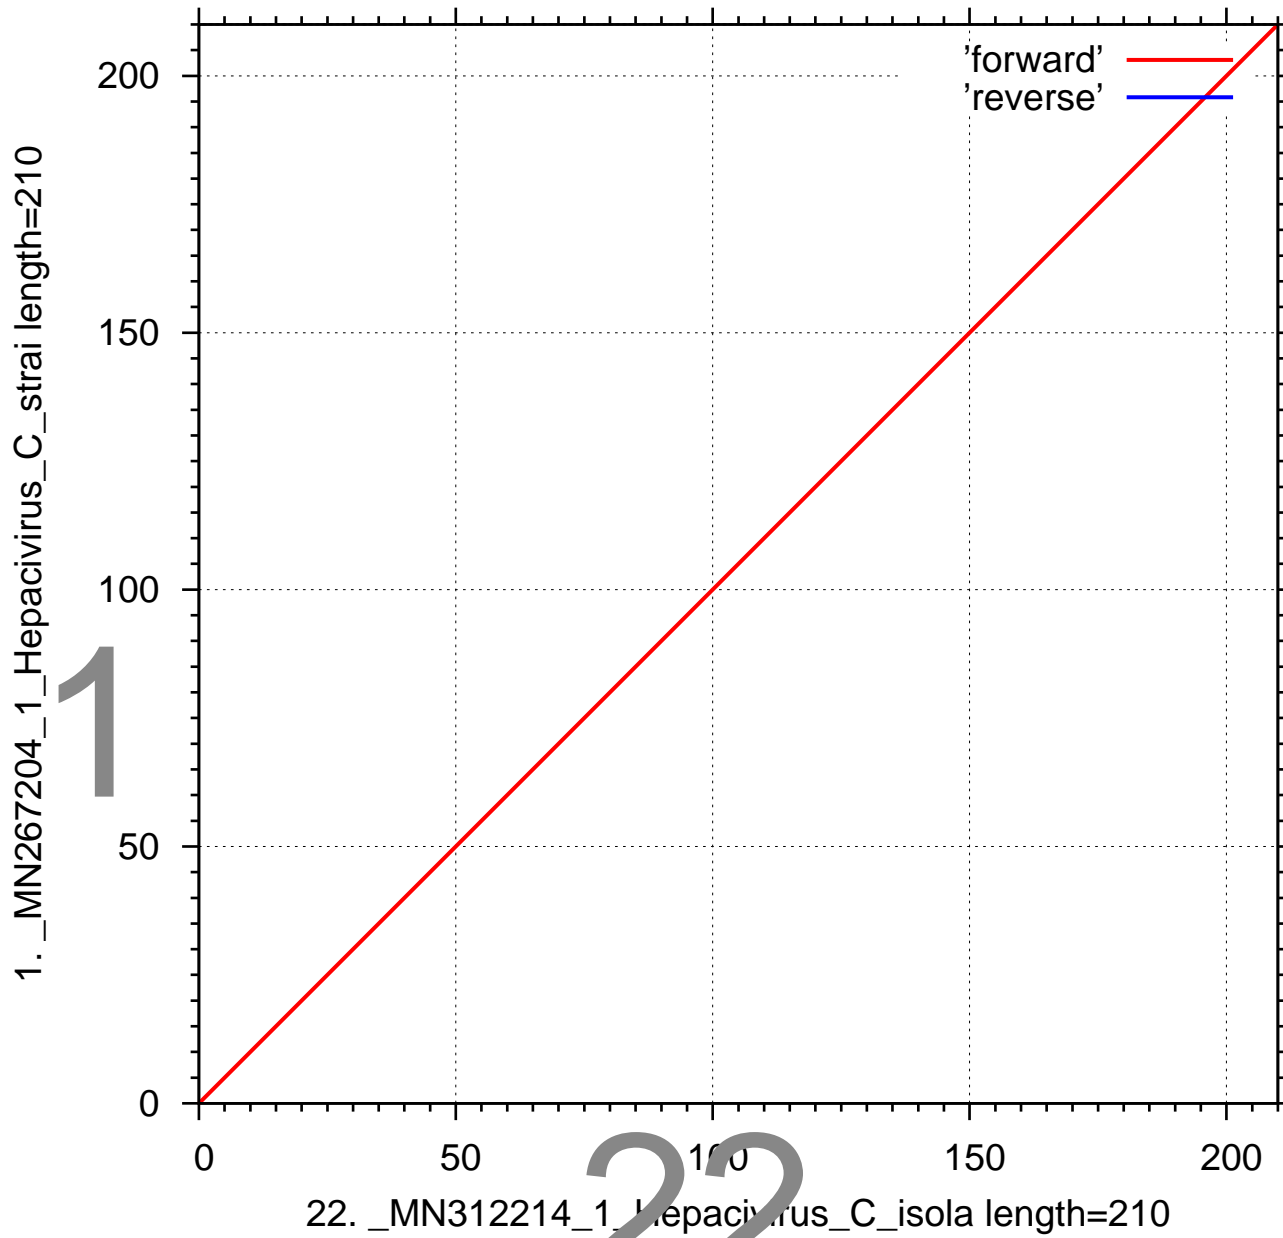

Threshold = 39

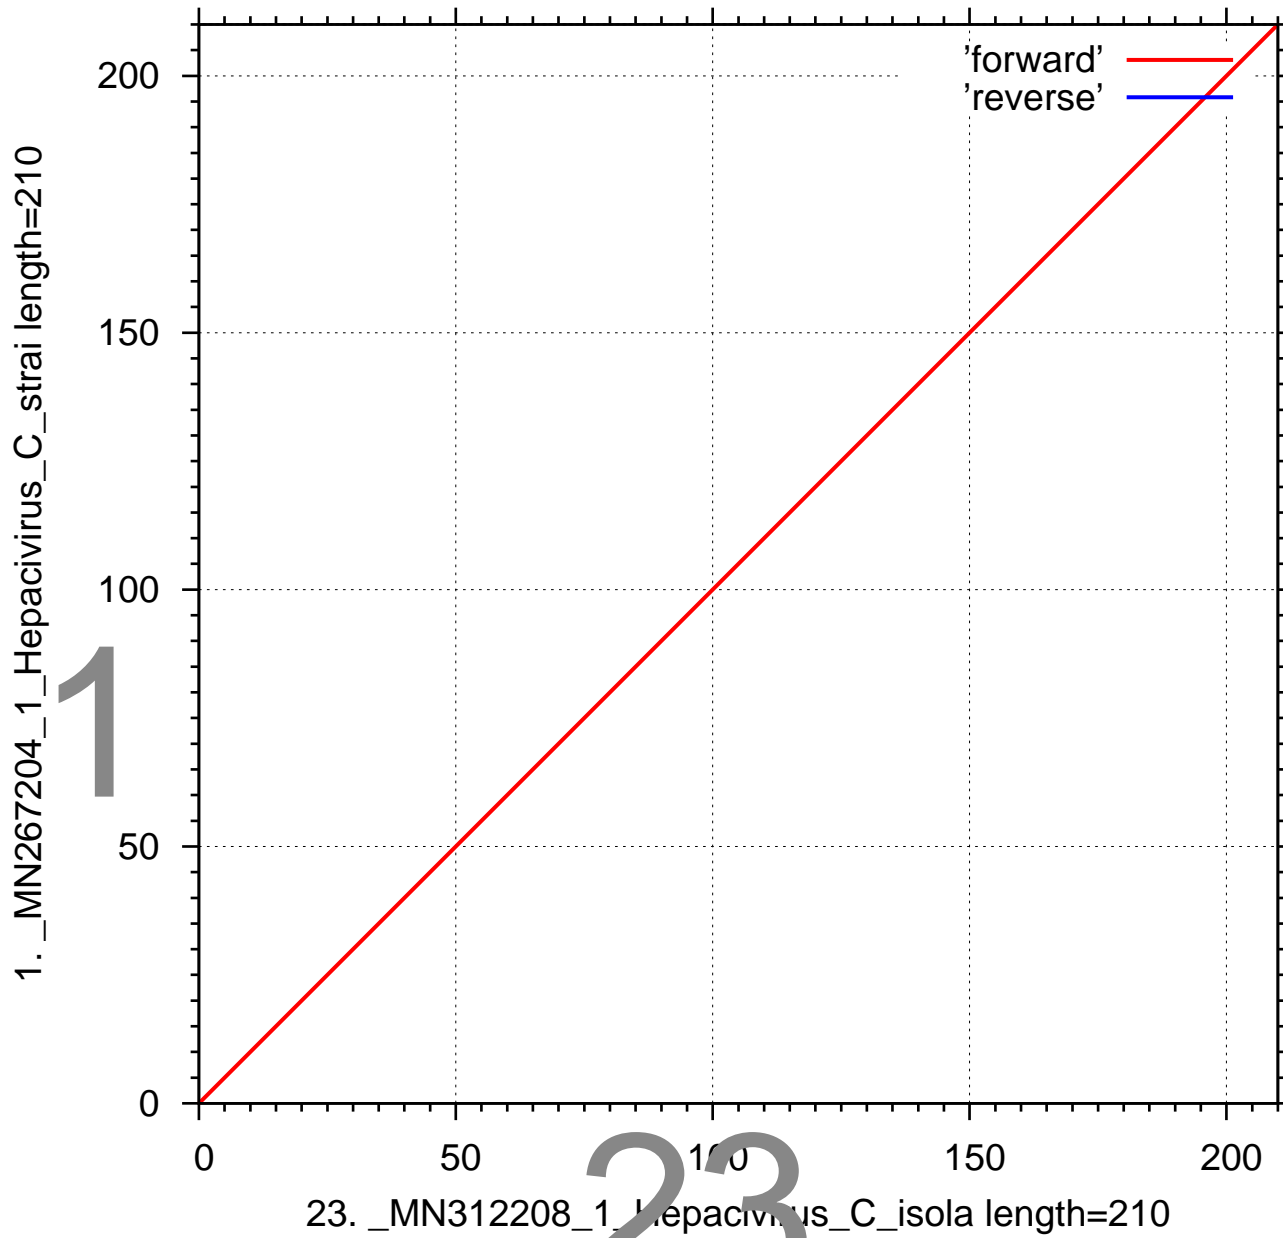

Threshold = 39

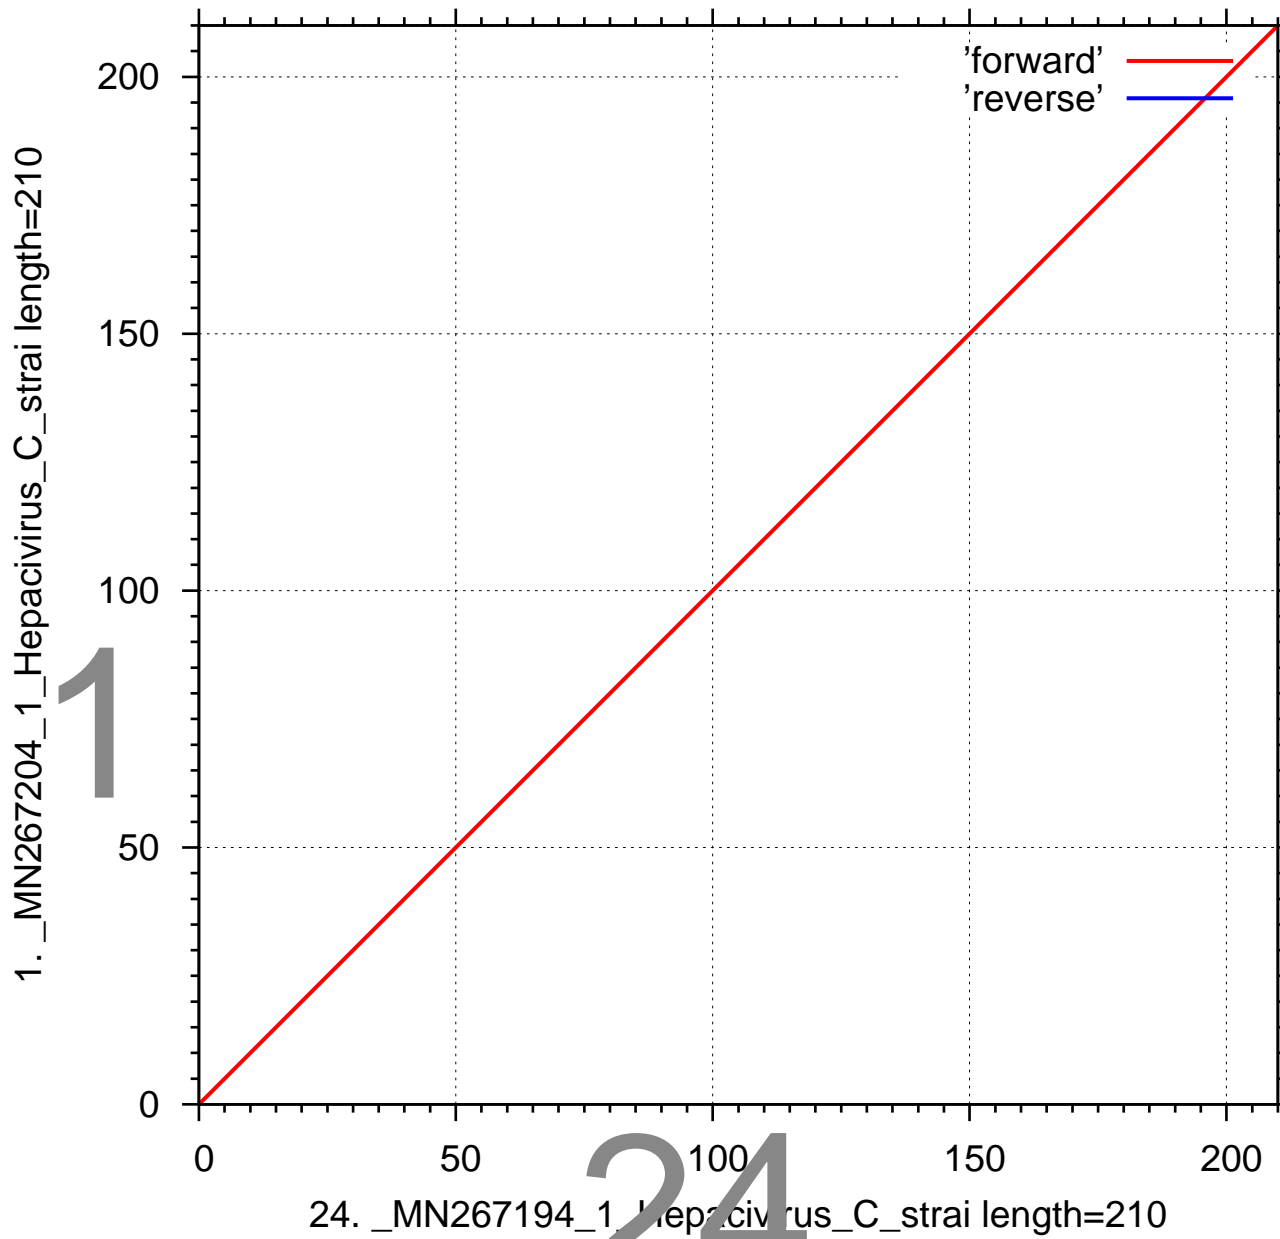



Threshold = 39

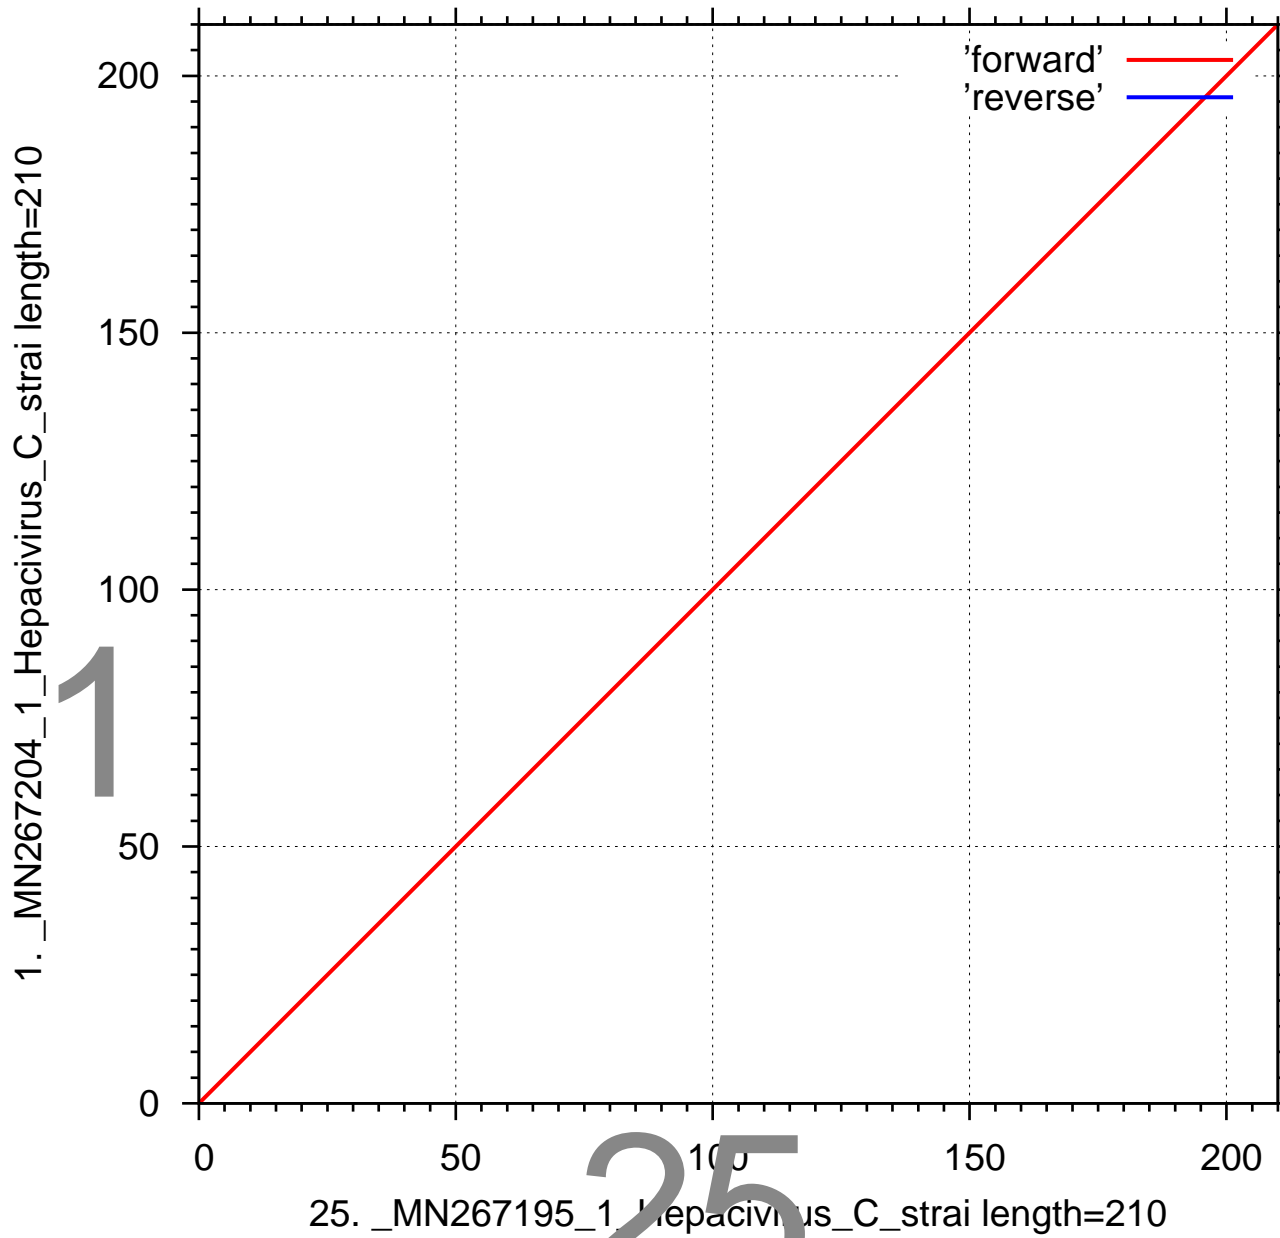

Threshold = 39

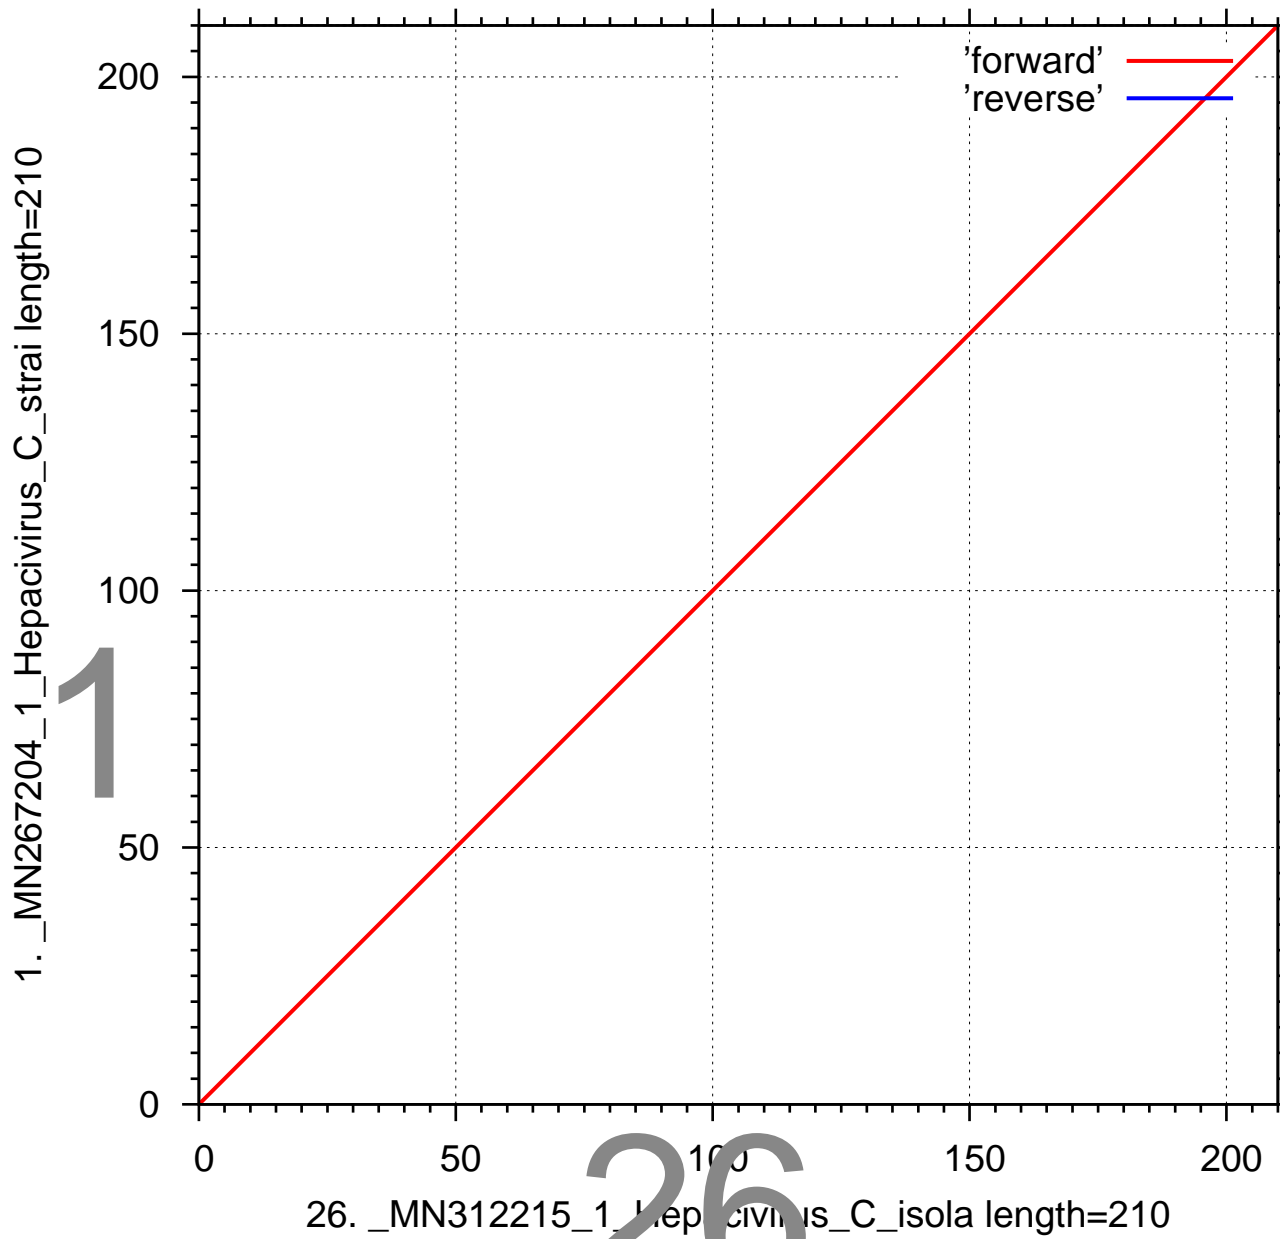

Threshold = 39

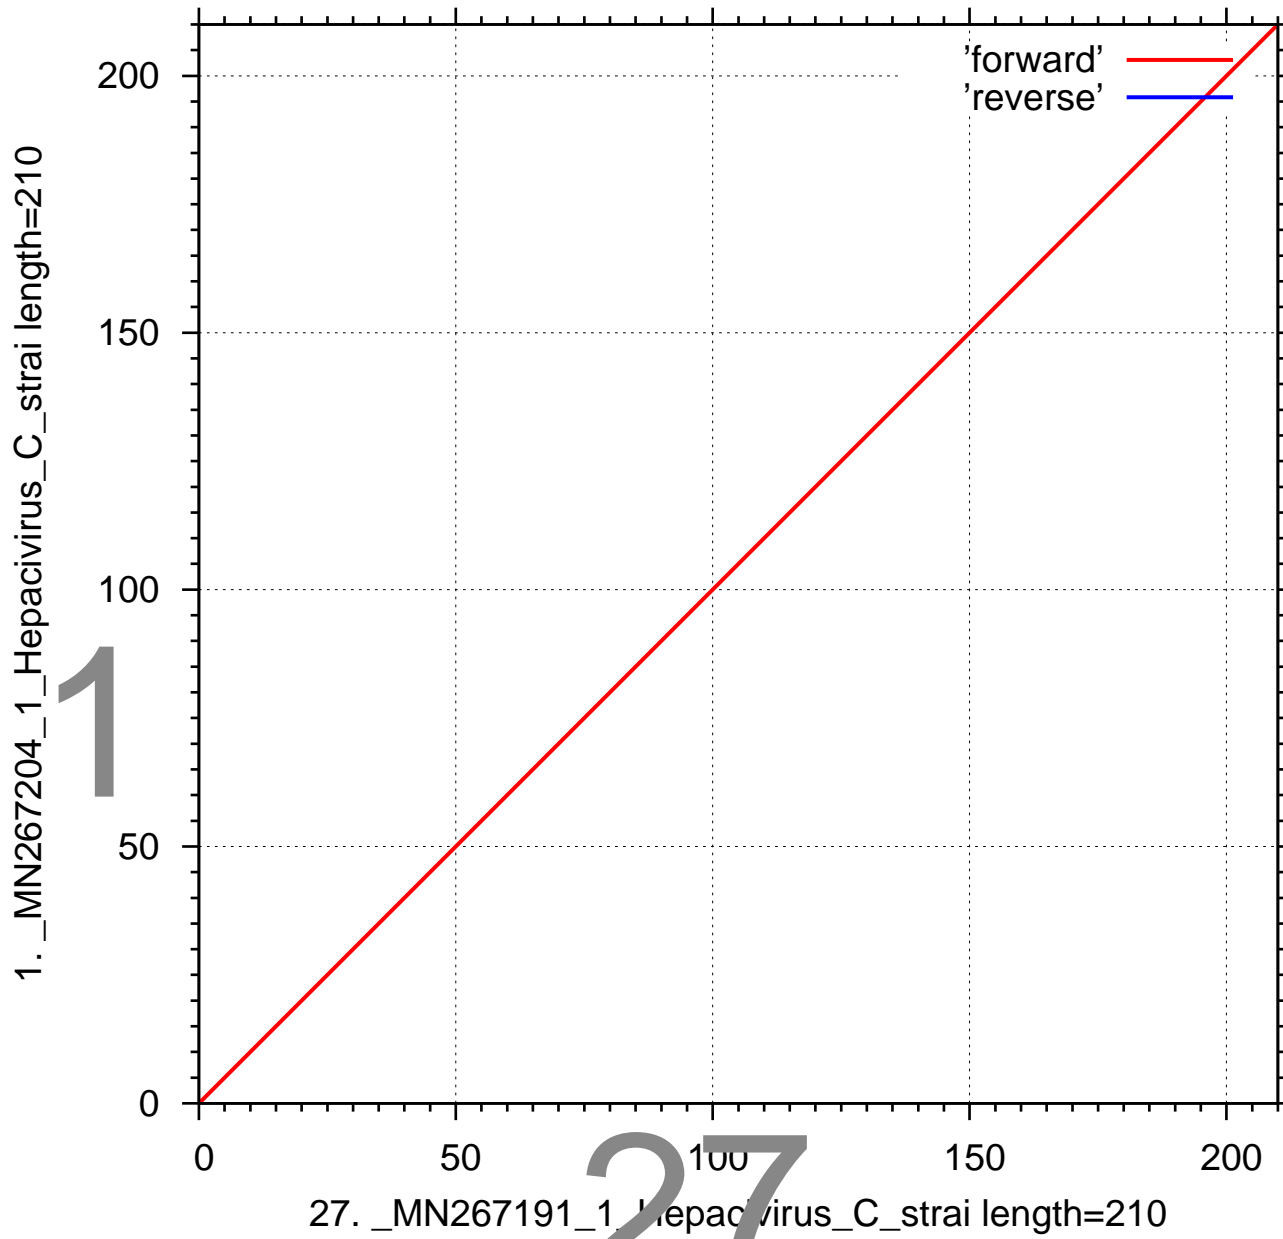

Threshold = 39

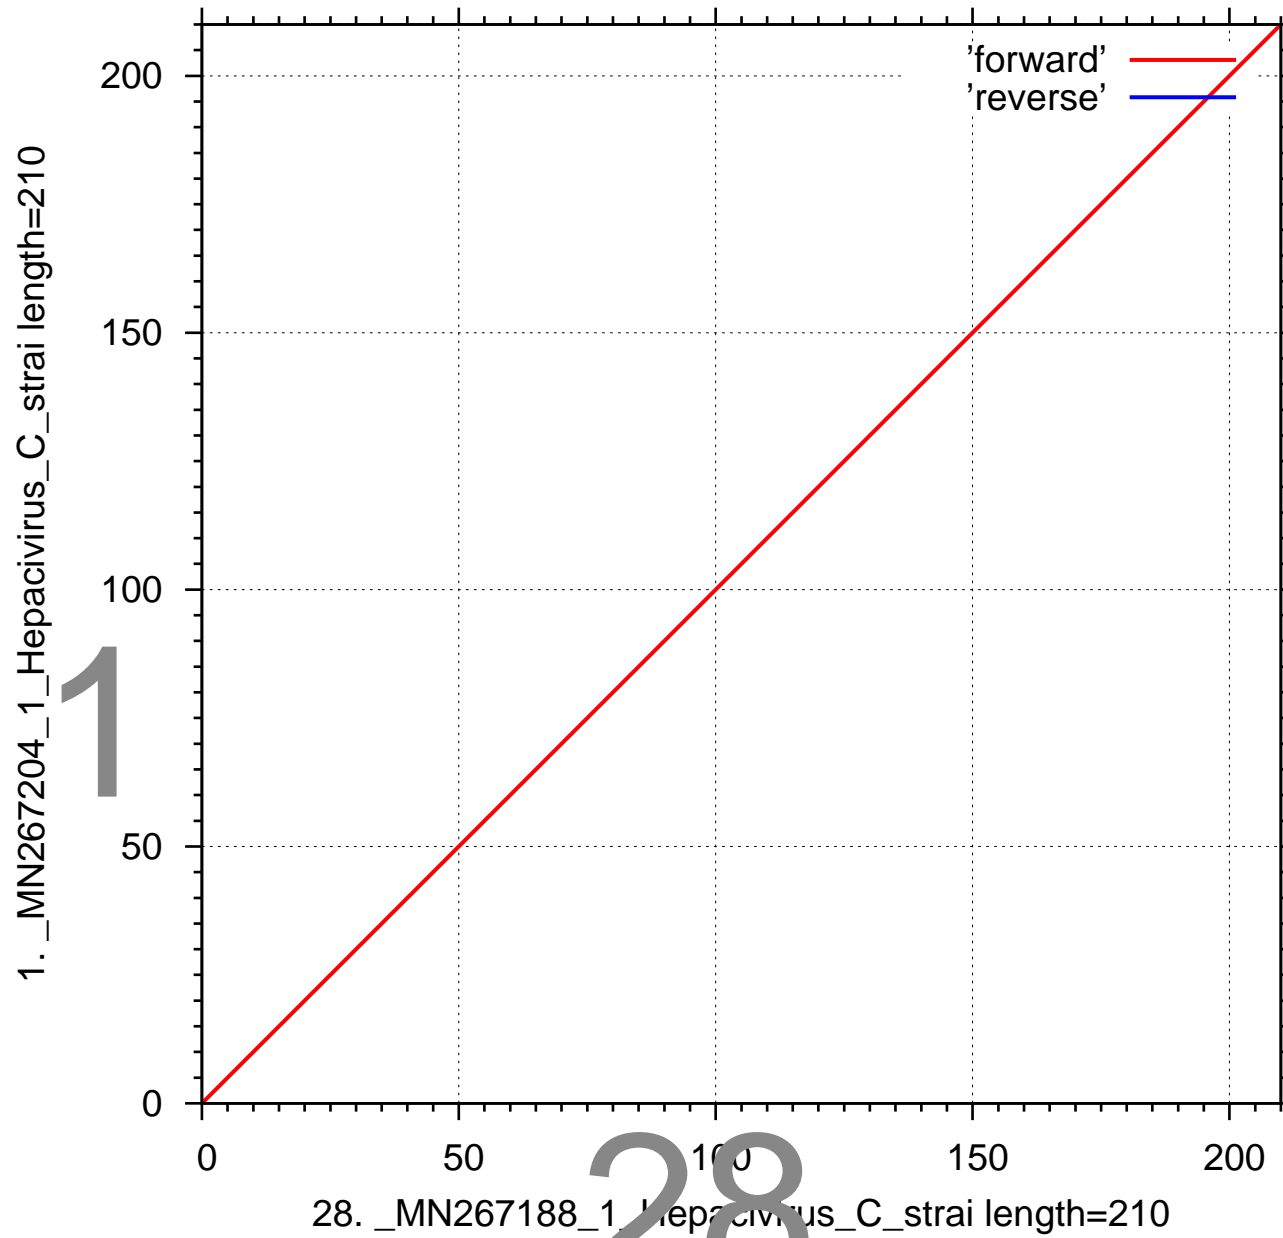

Threshold = 39

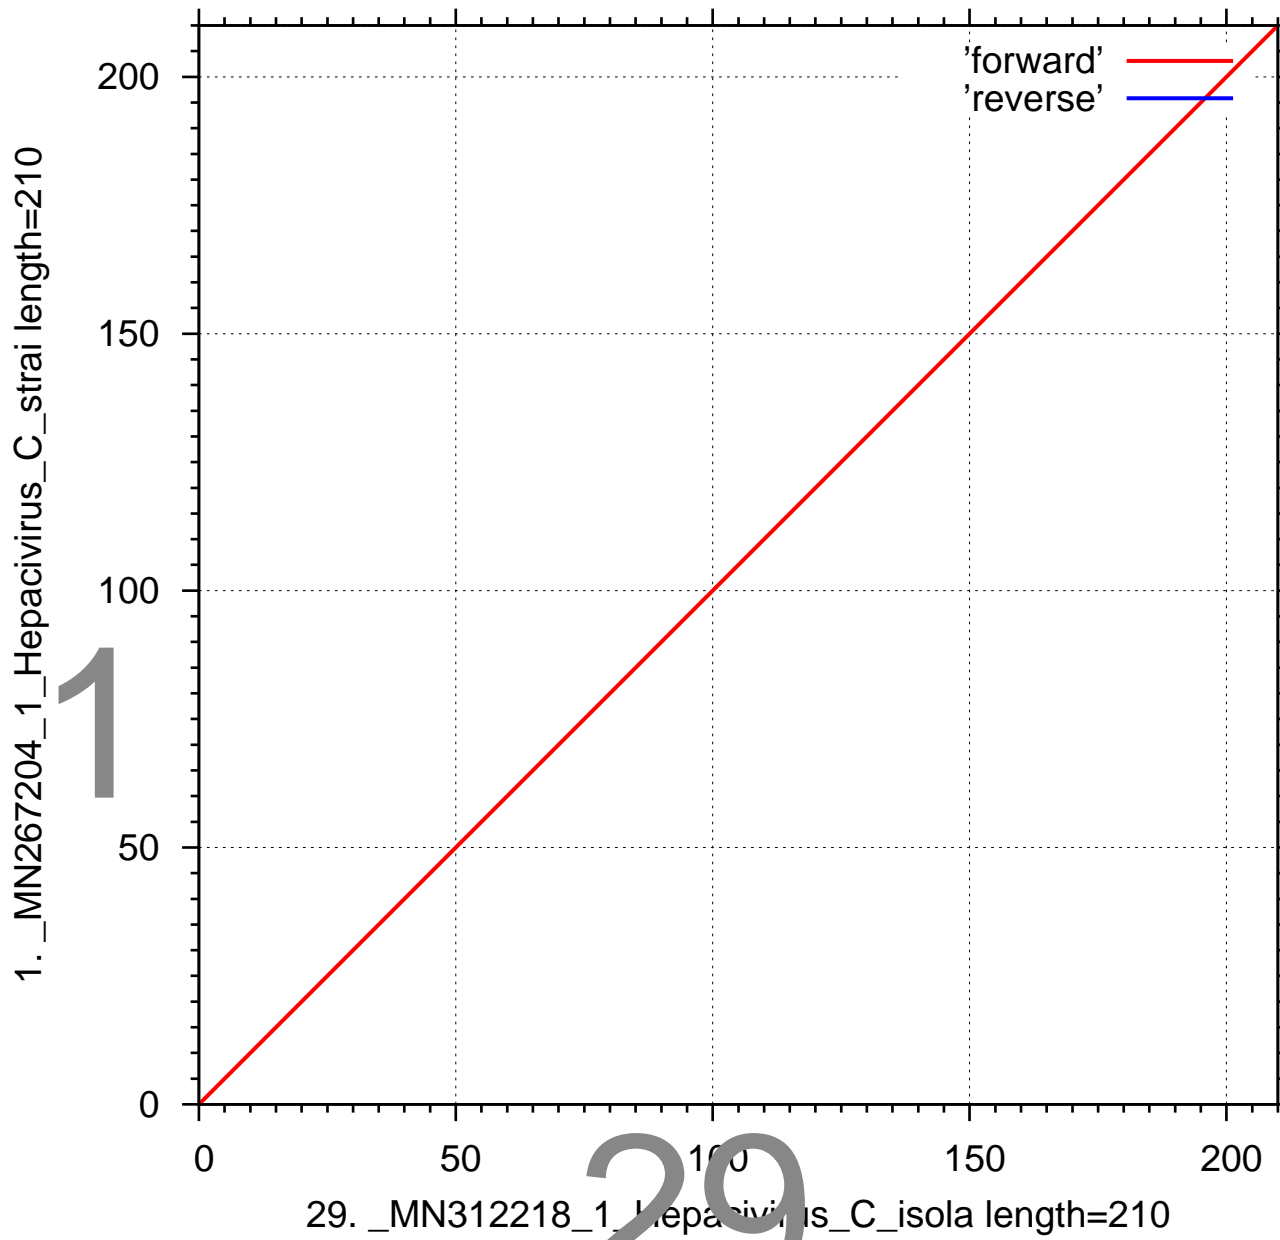

Threshold = 39

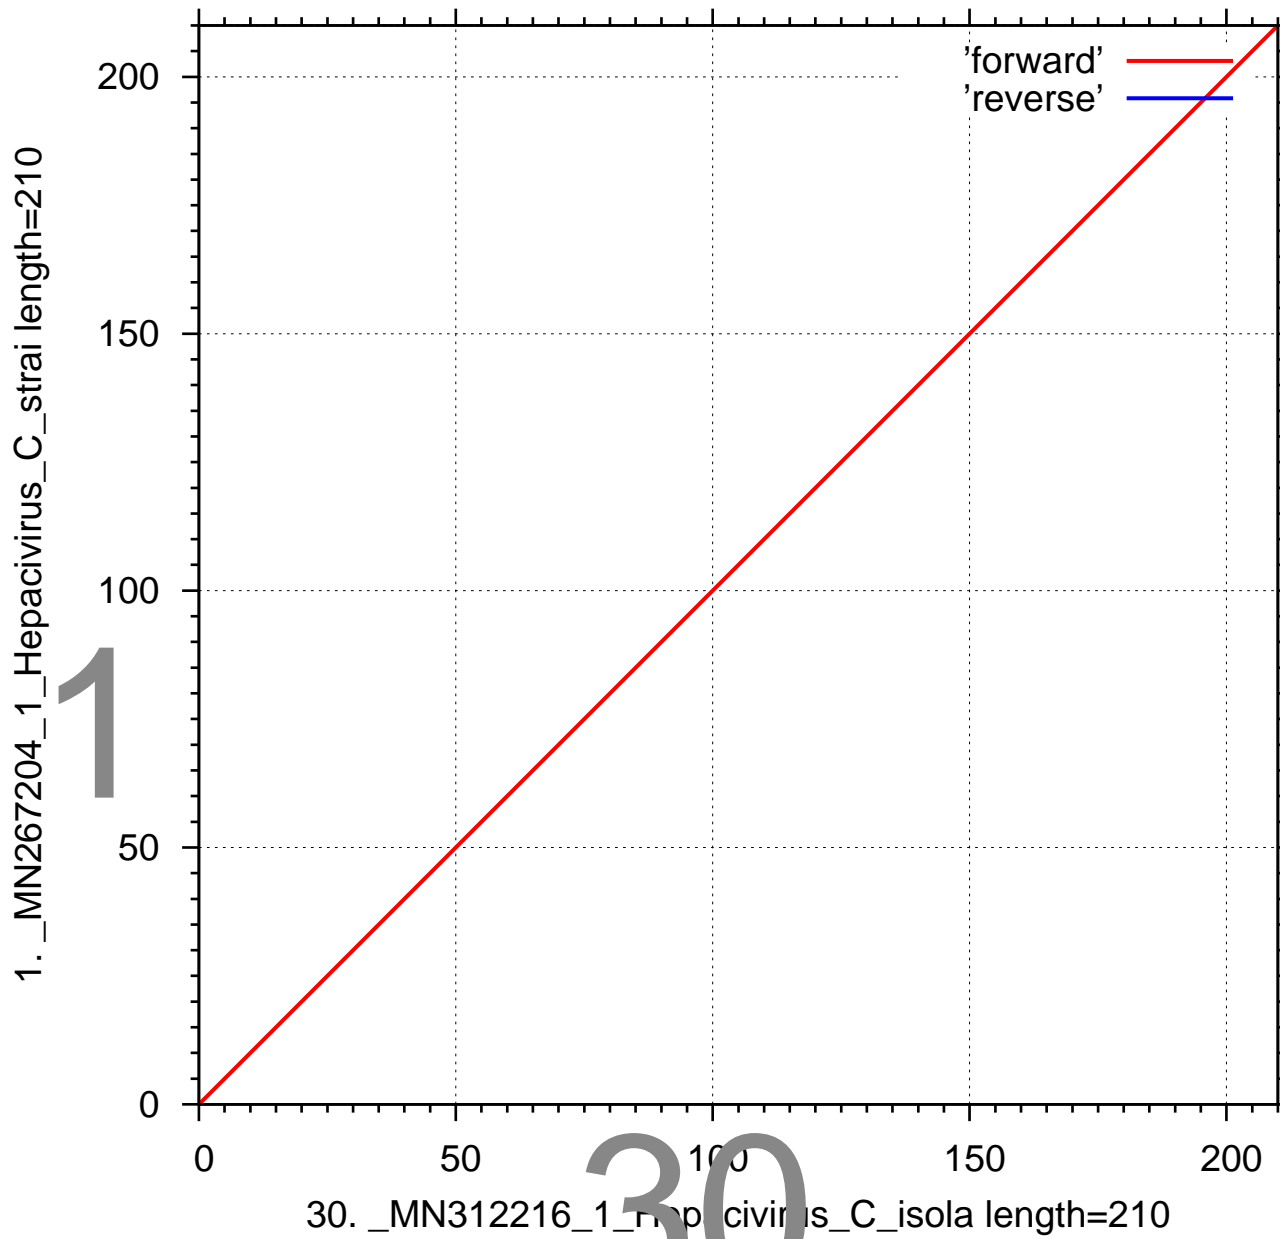

Threshold = 39

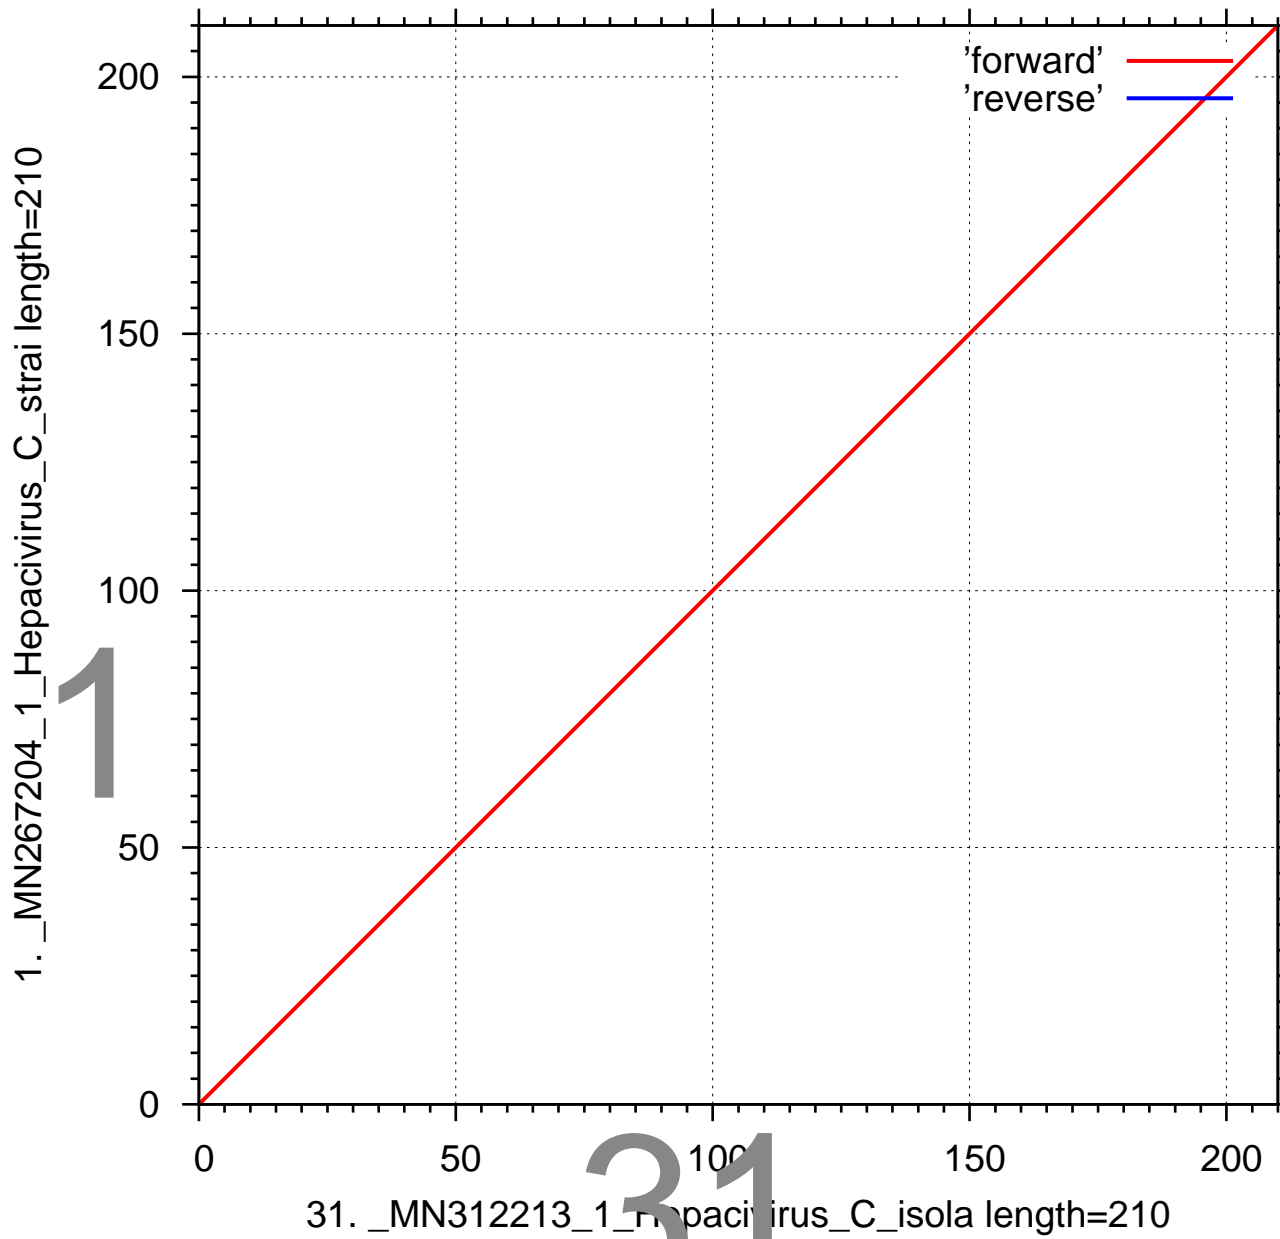

Threshold = 39

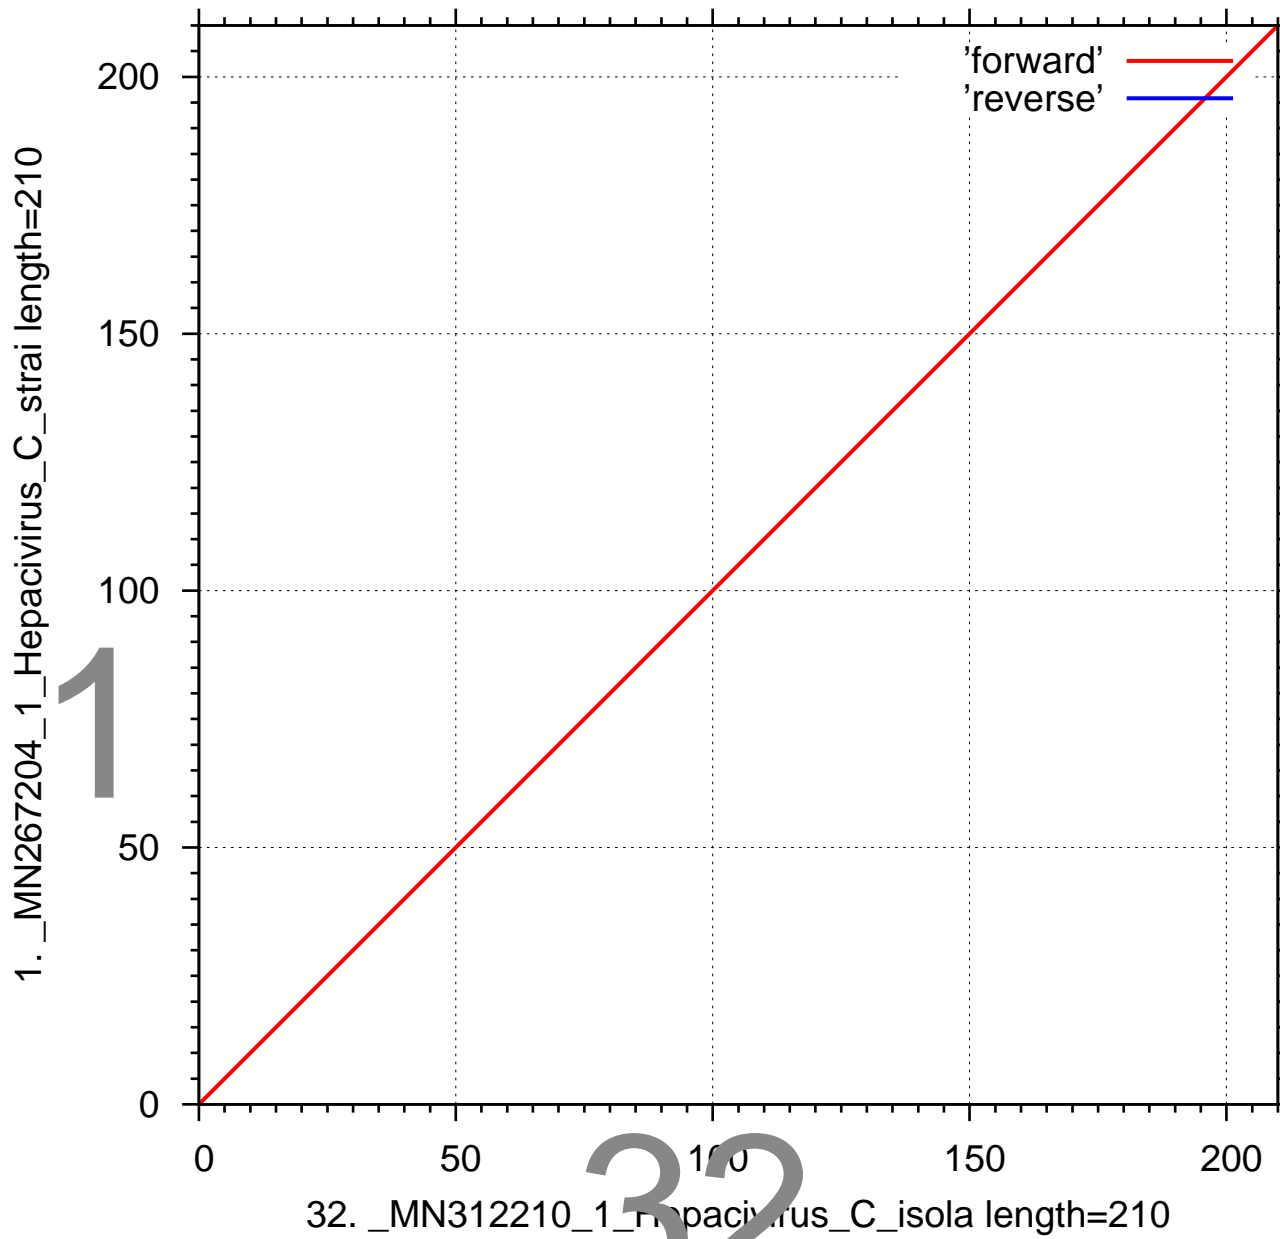



Threshold = 39

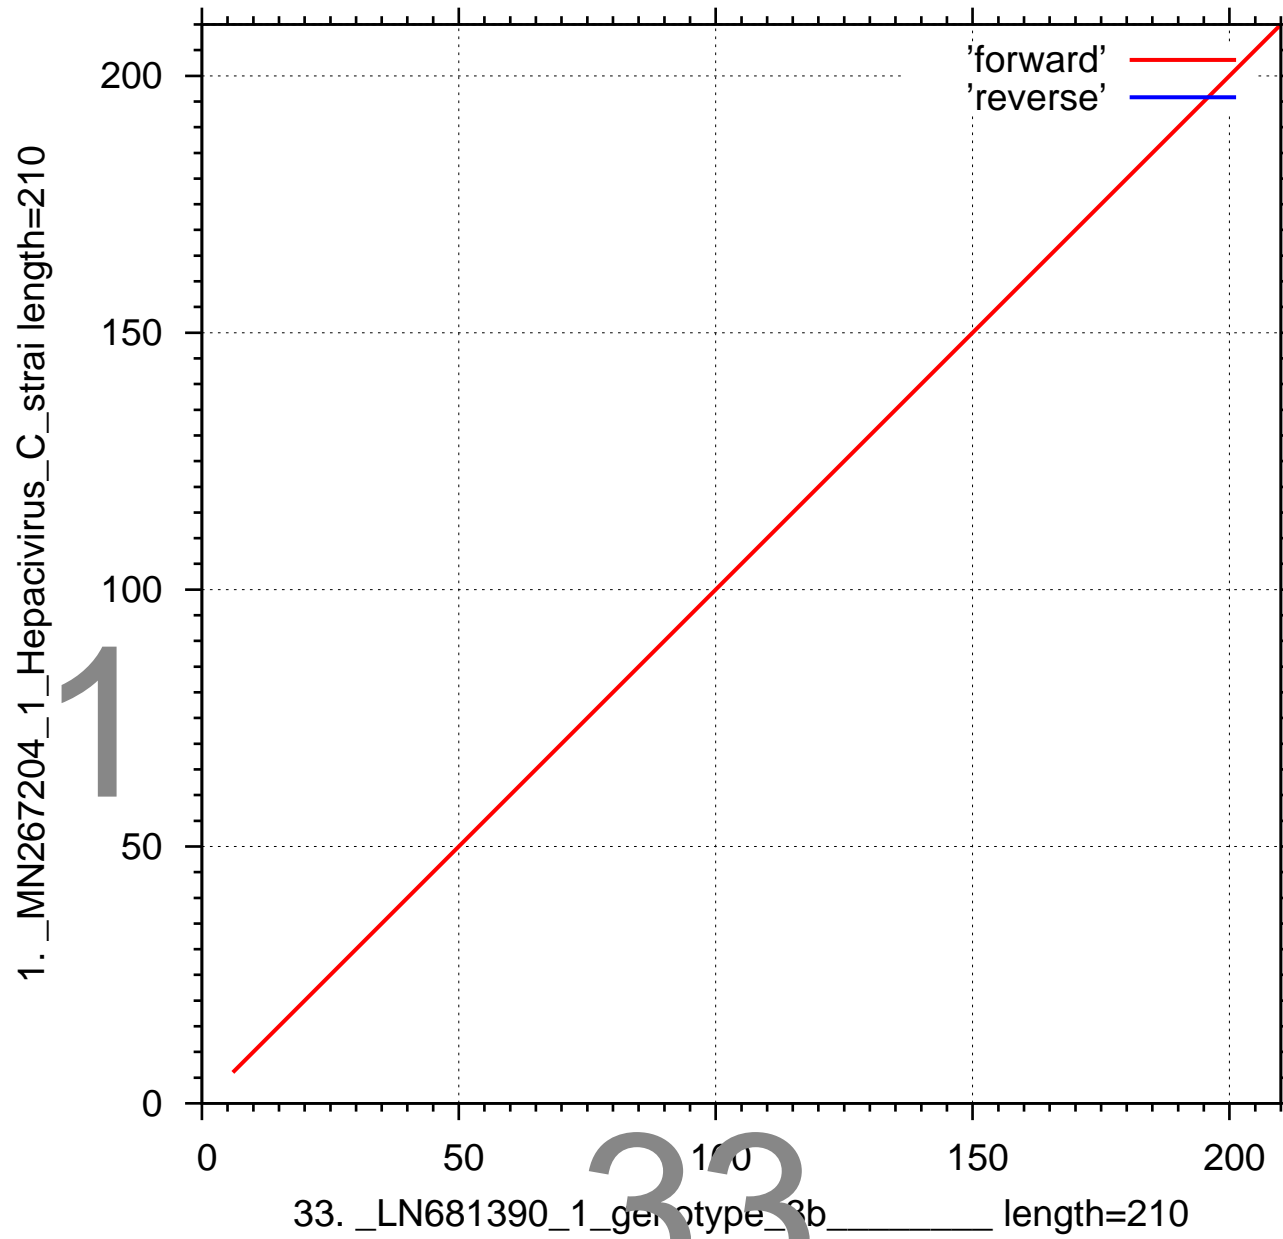

Threshold = 39

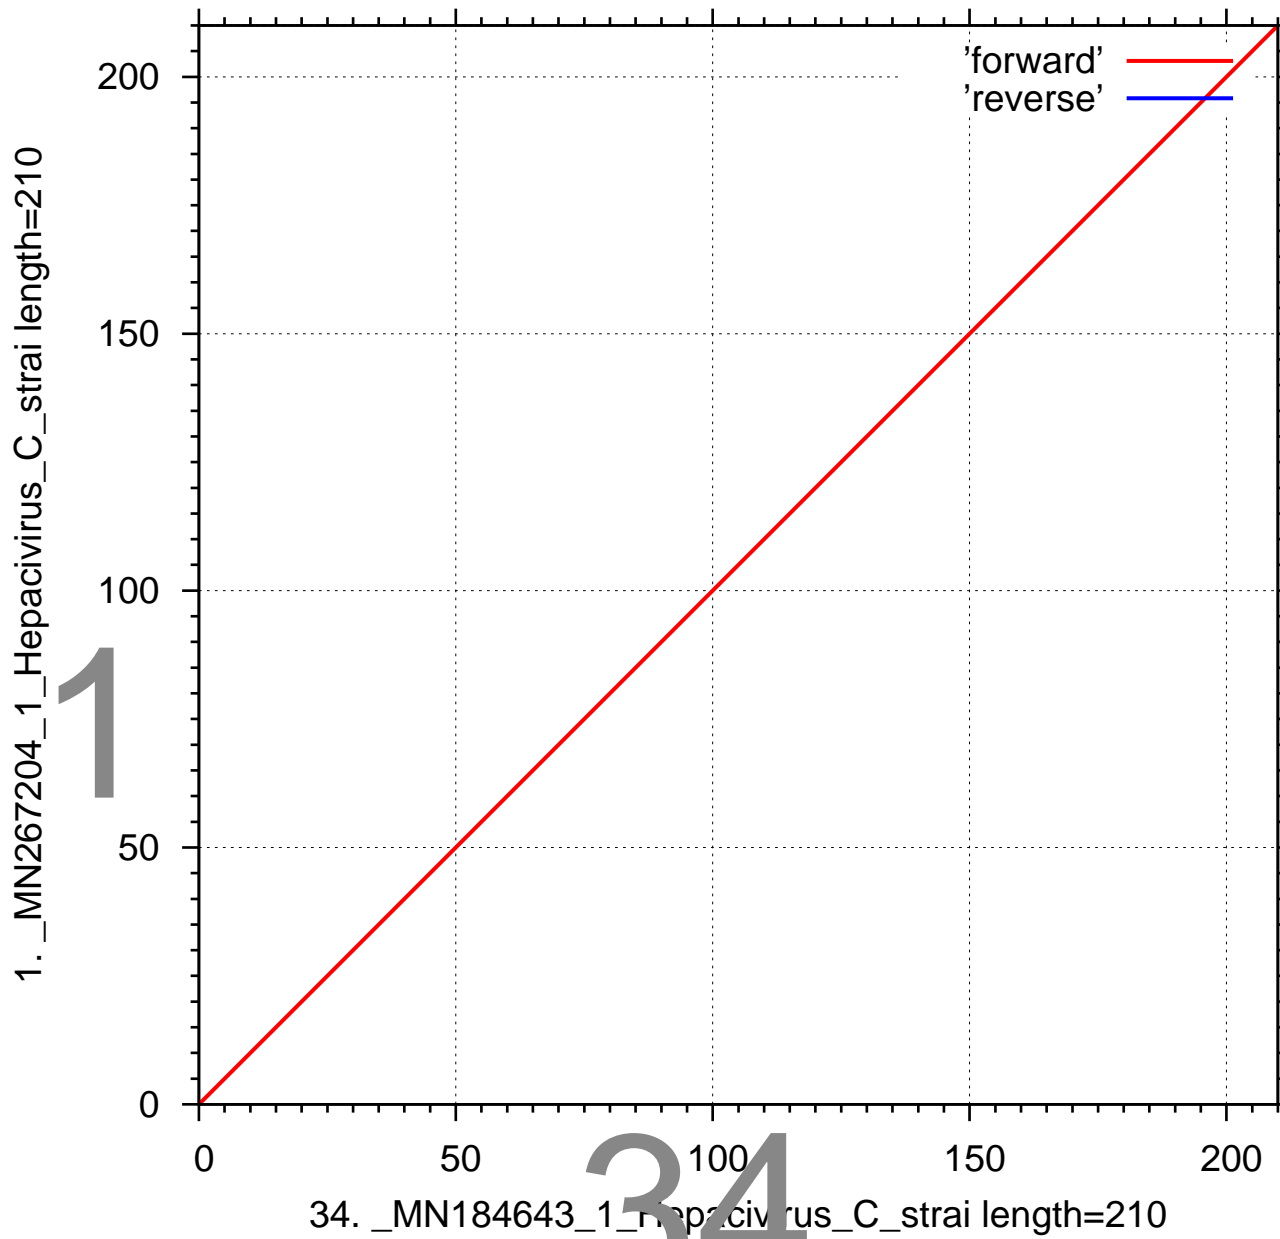

Threshold = 39

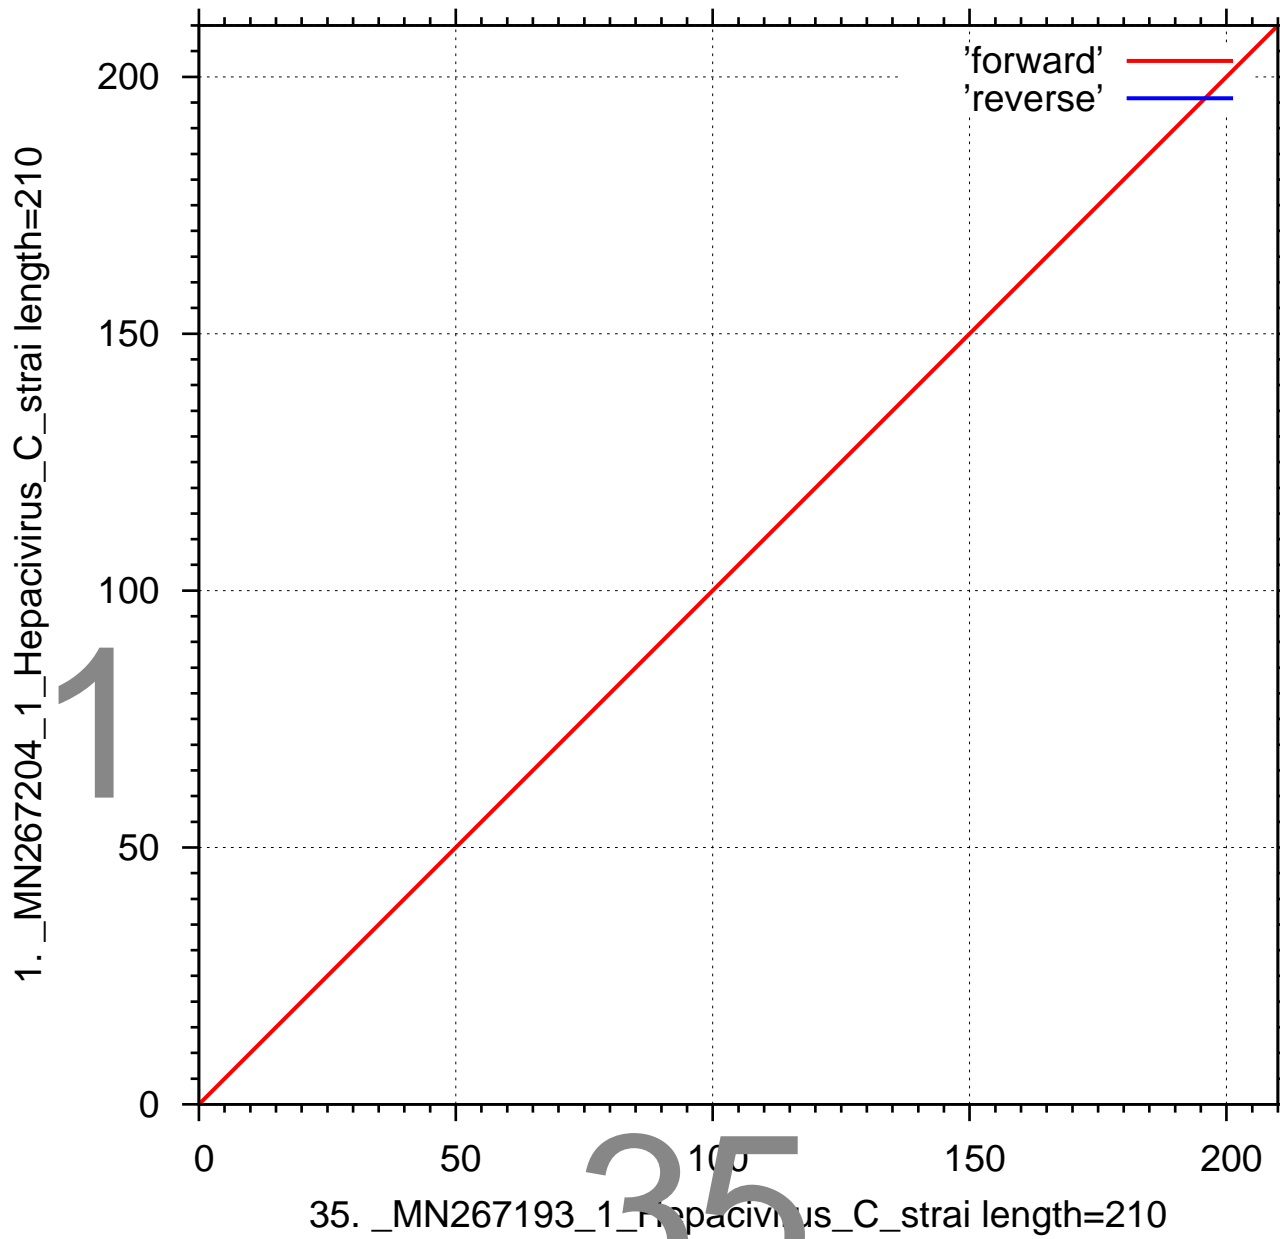

Threshold = 39

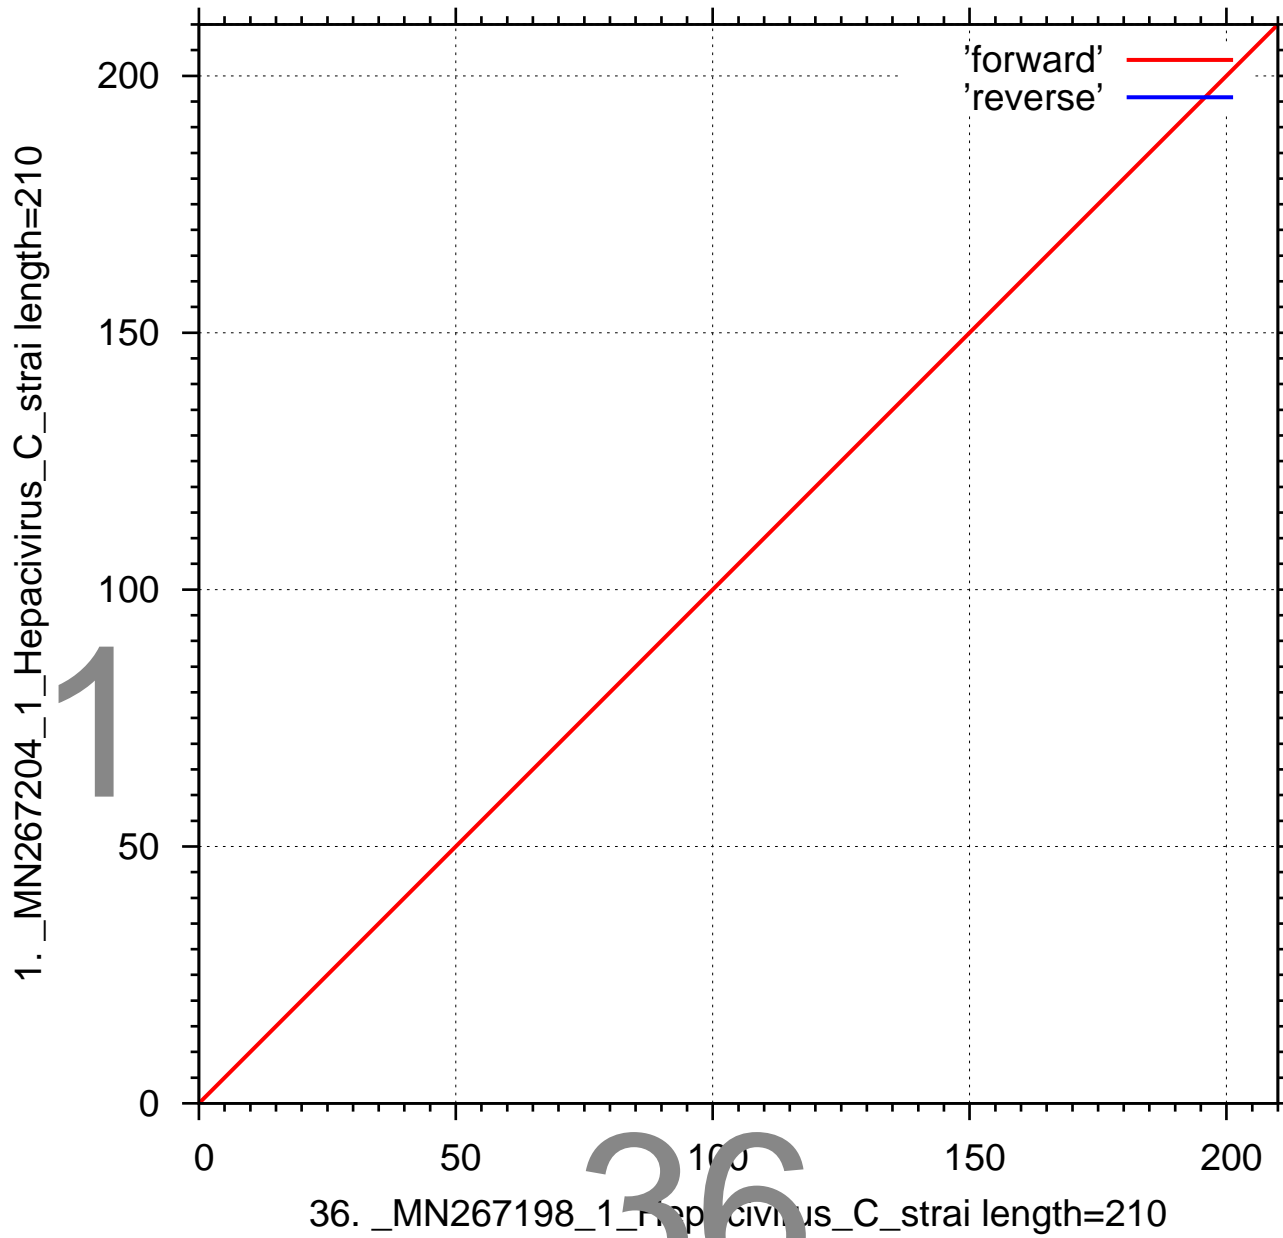

Threshold = 39

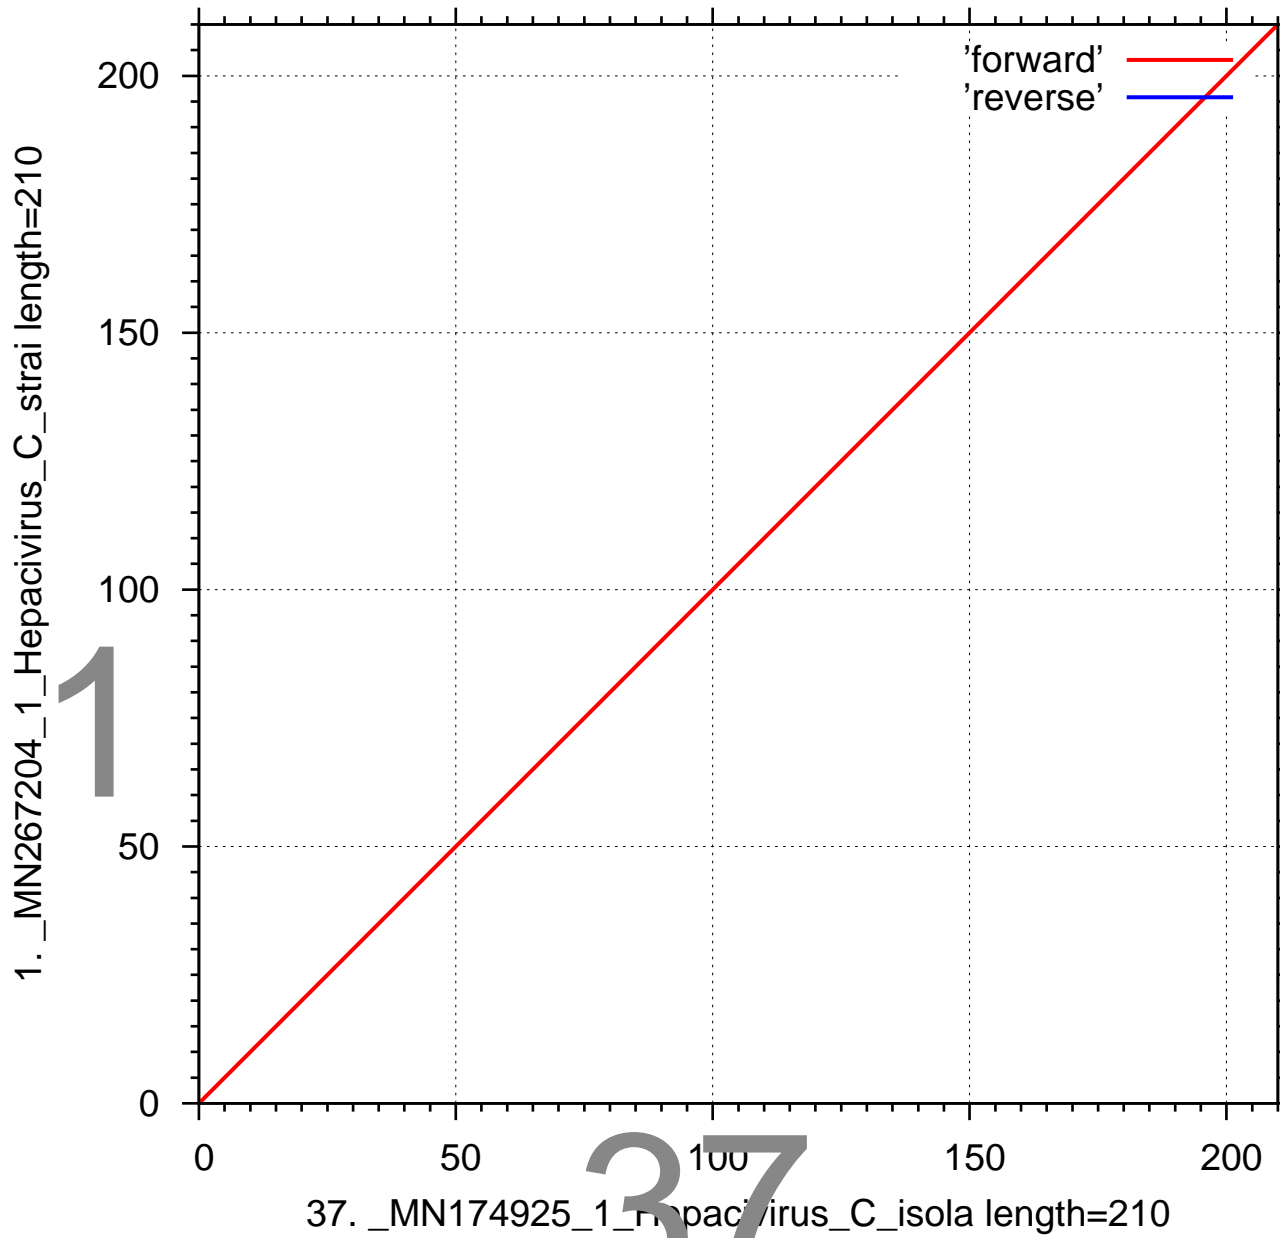

Threshold = 39

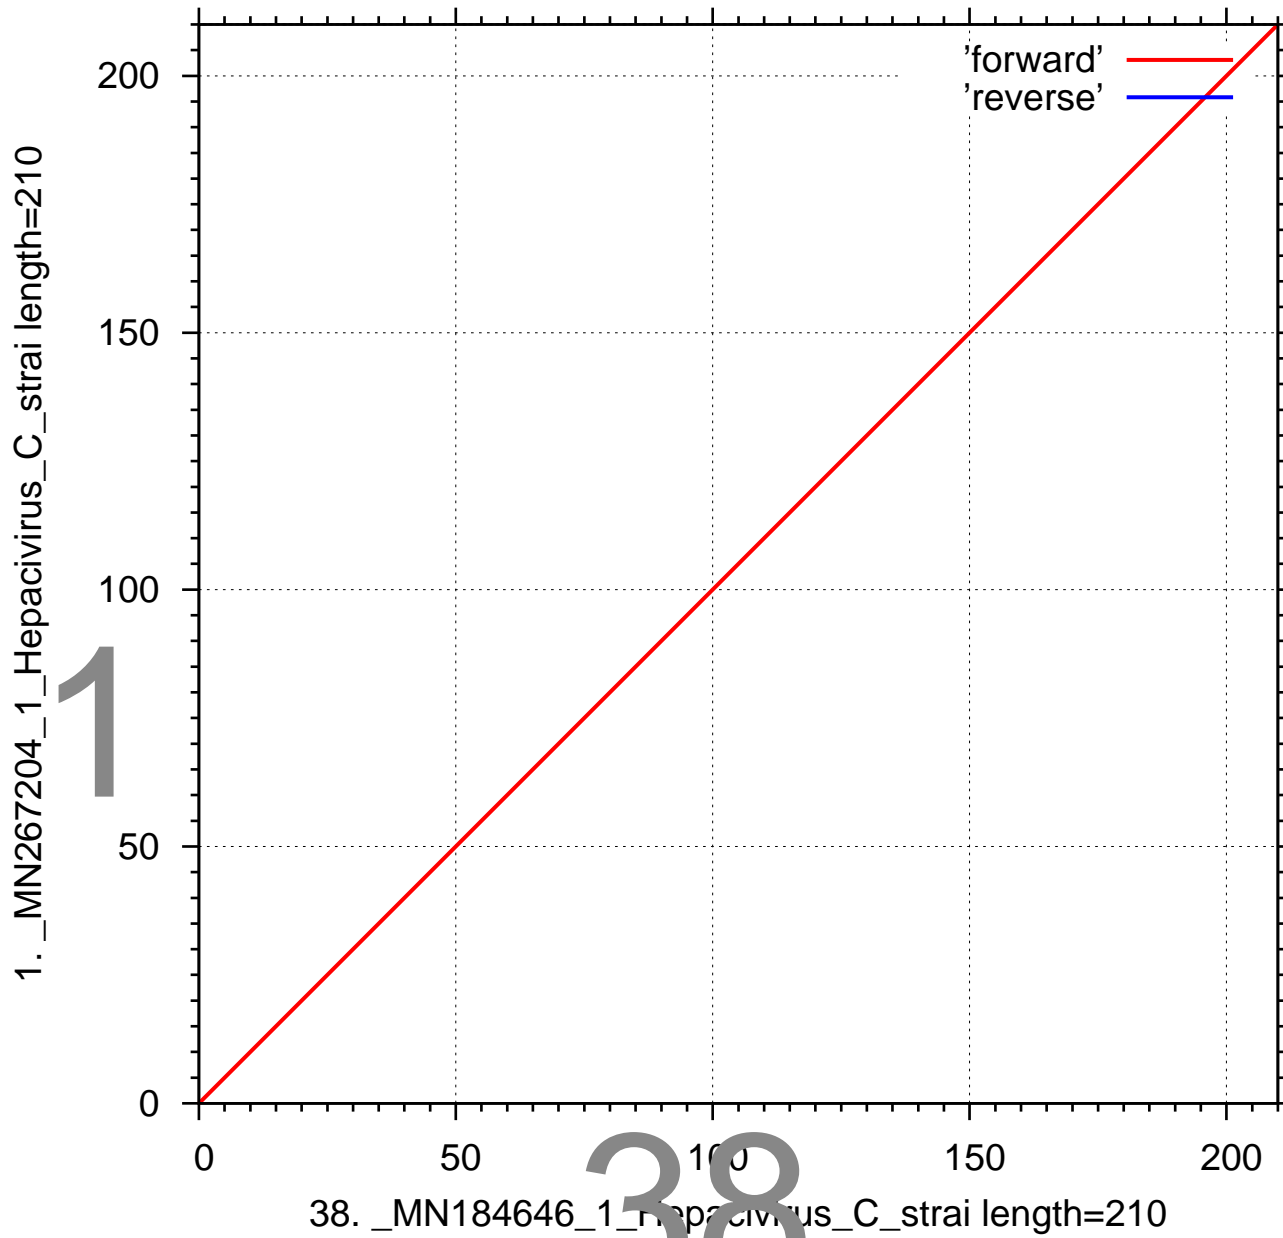

Threshold = 39

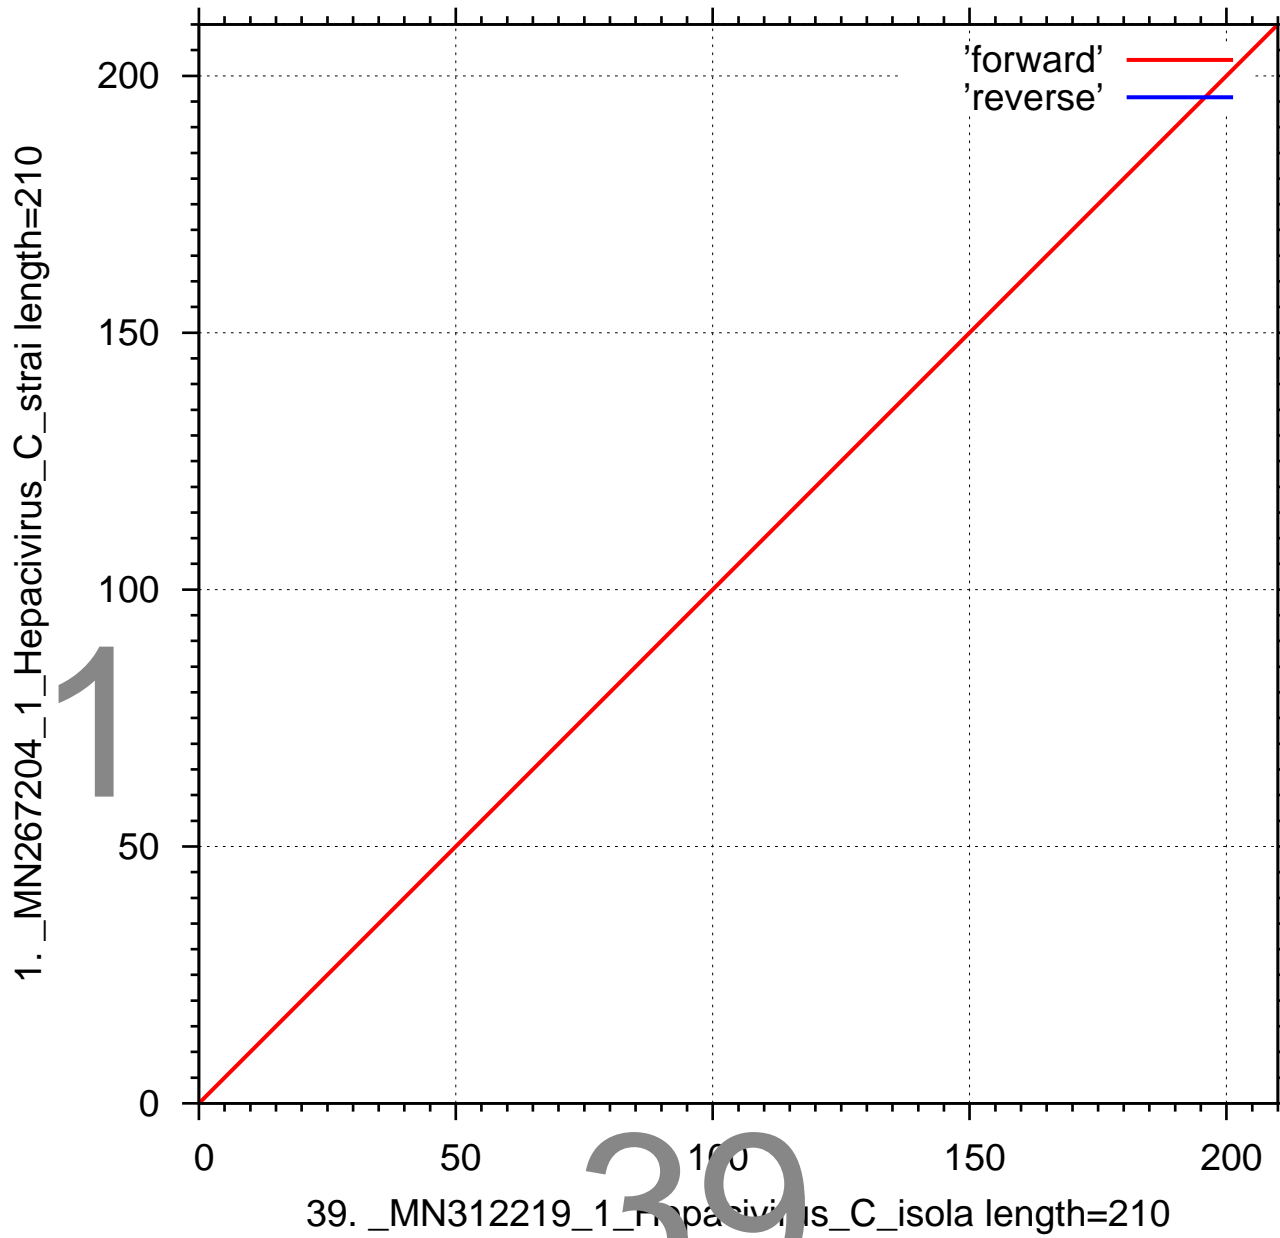

Threshold = 39

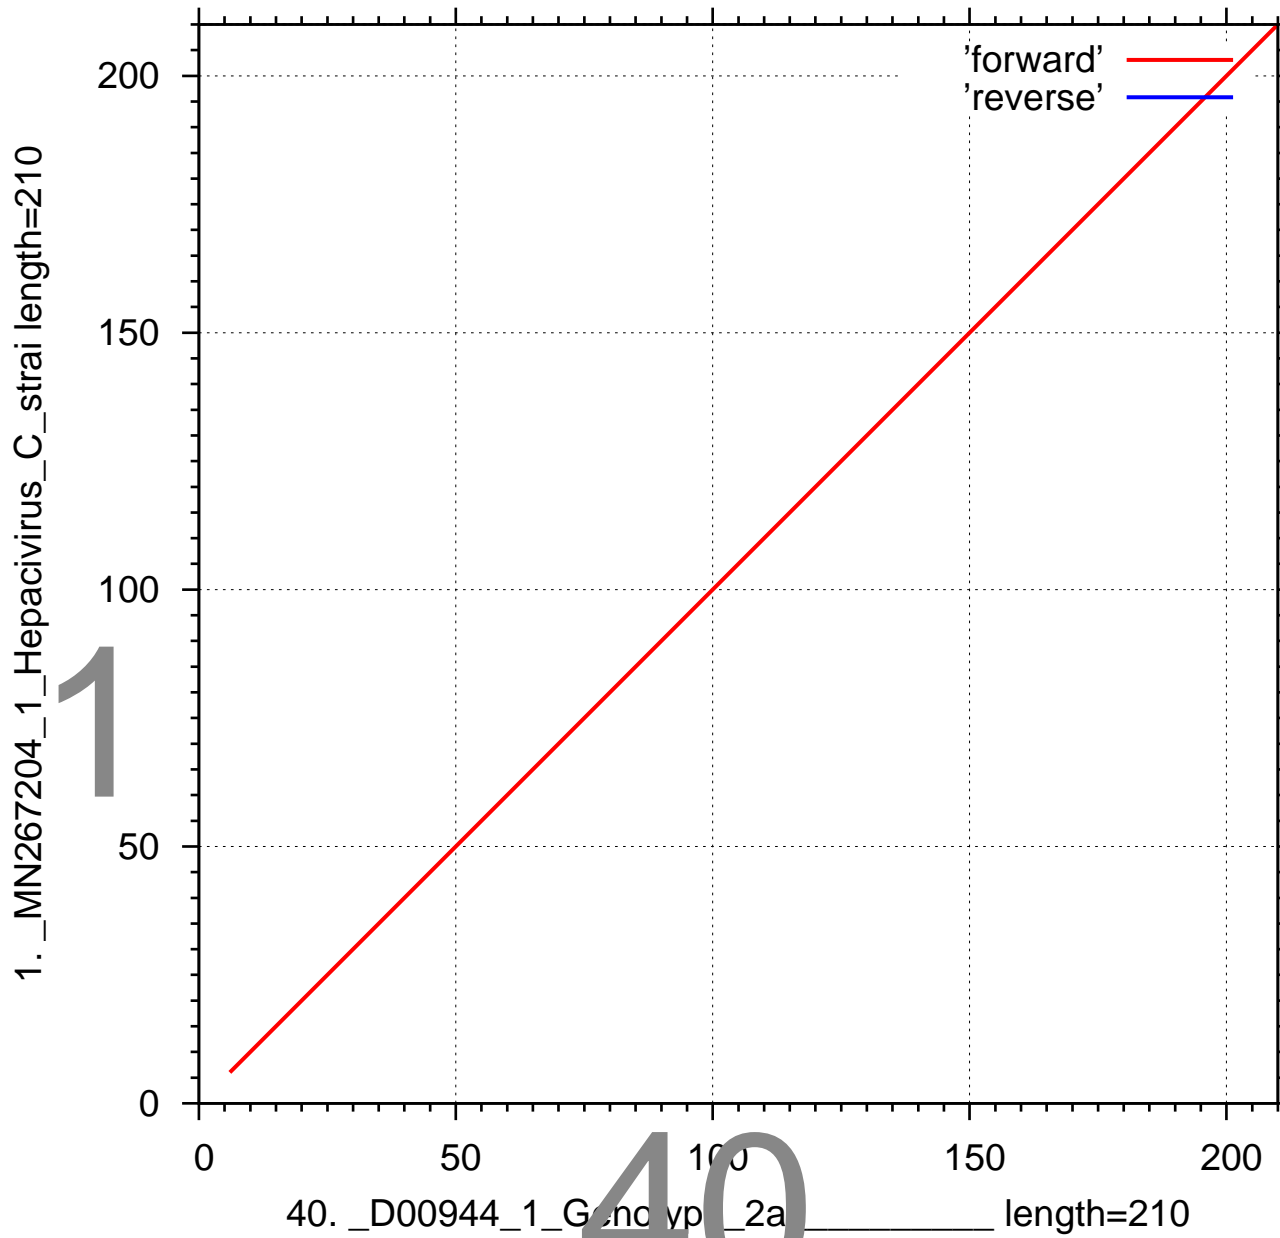



Threshold = 39

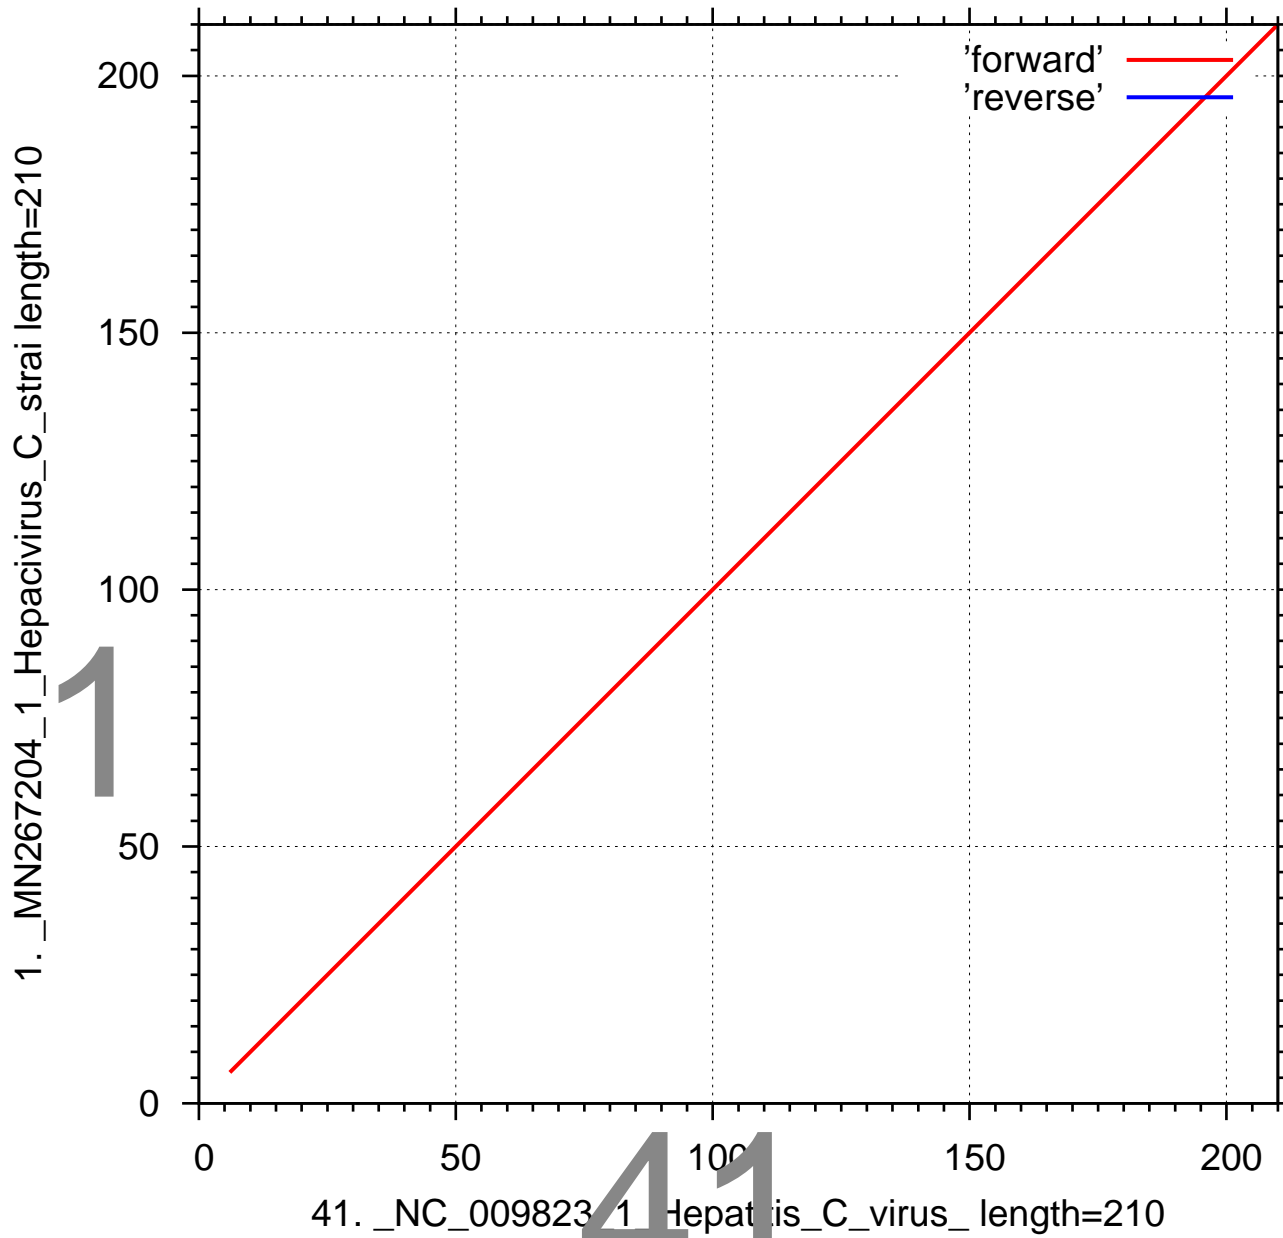

Threshold = 39

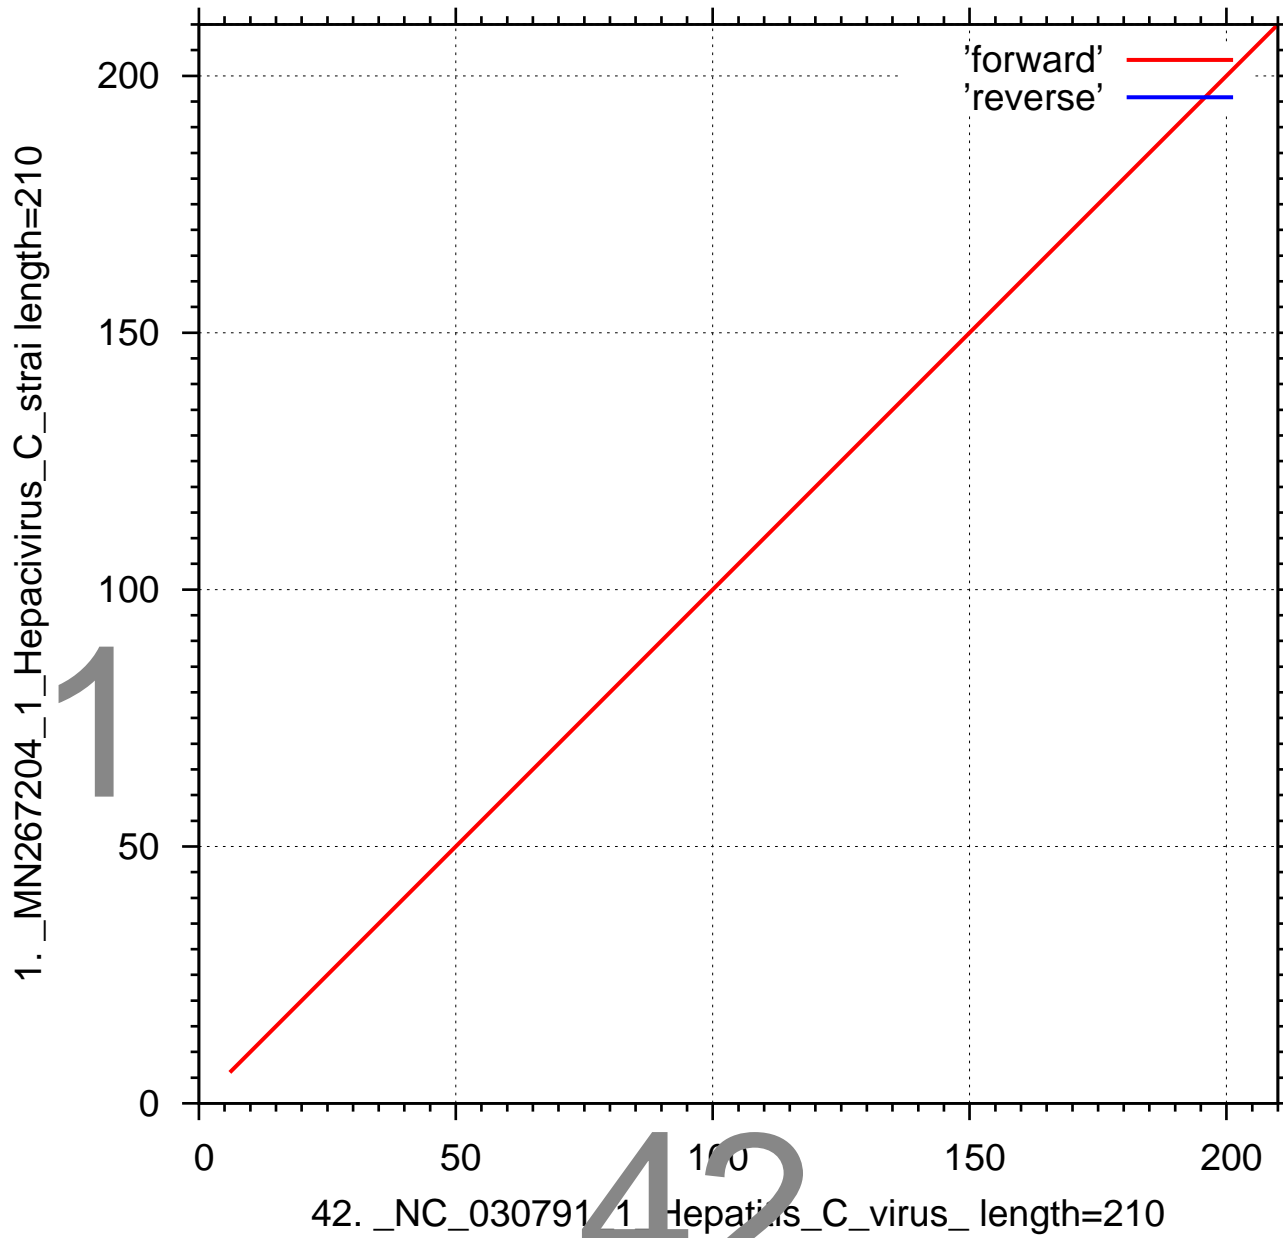

Threshold = 39

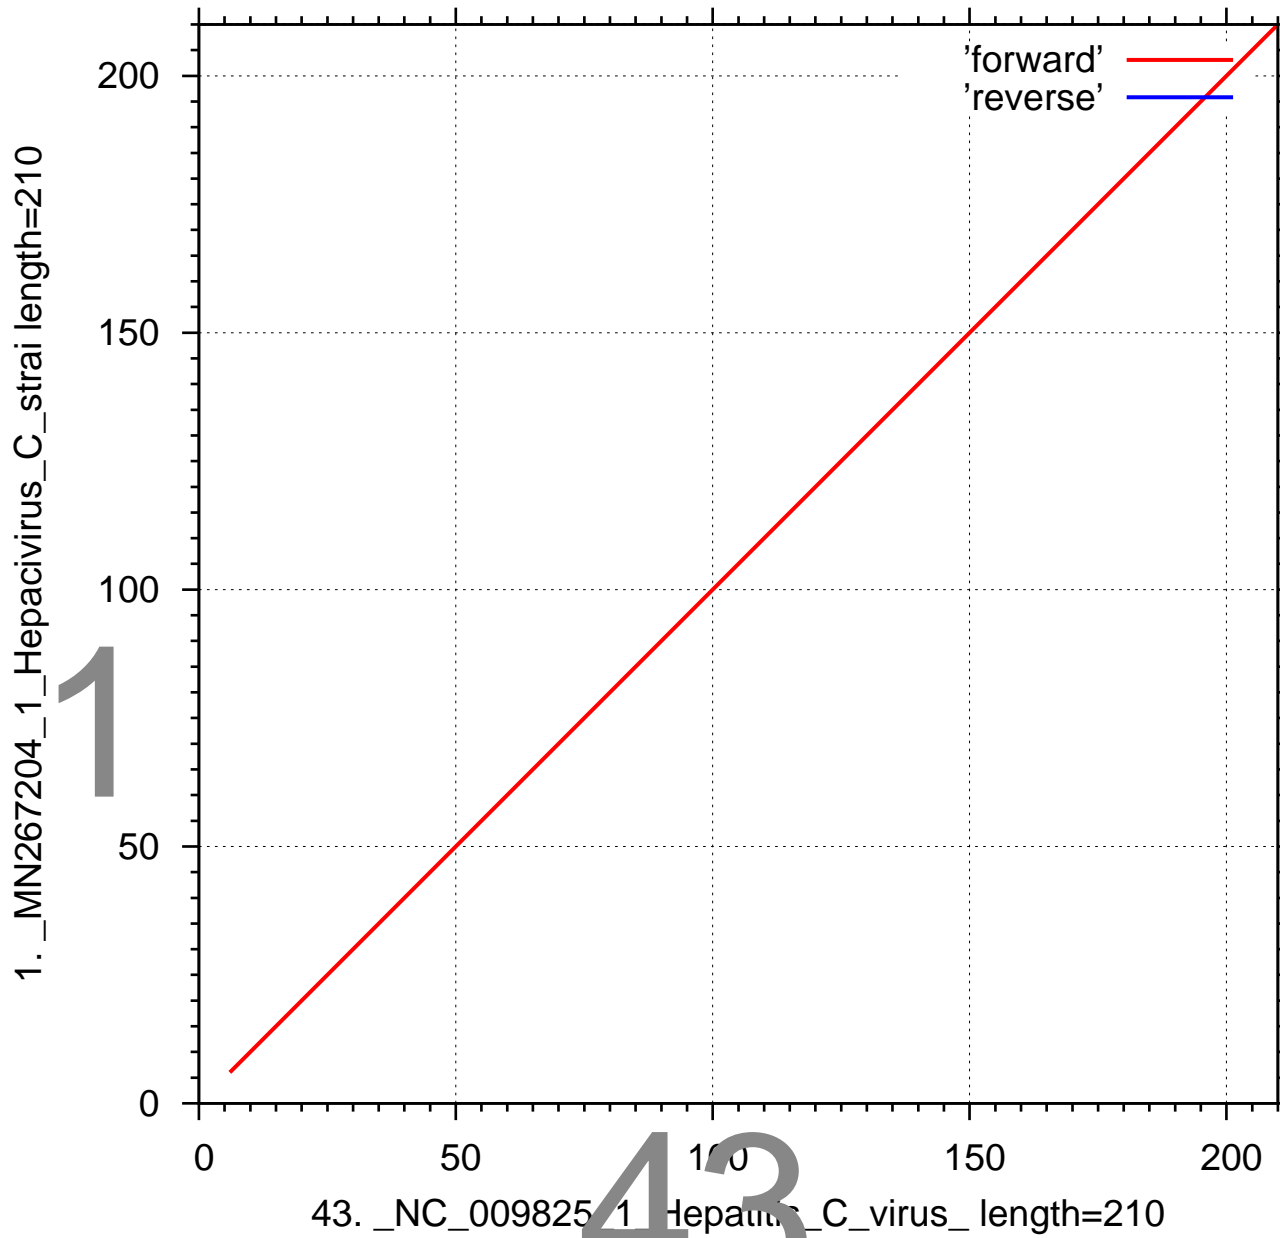

Threshold = 39

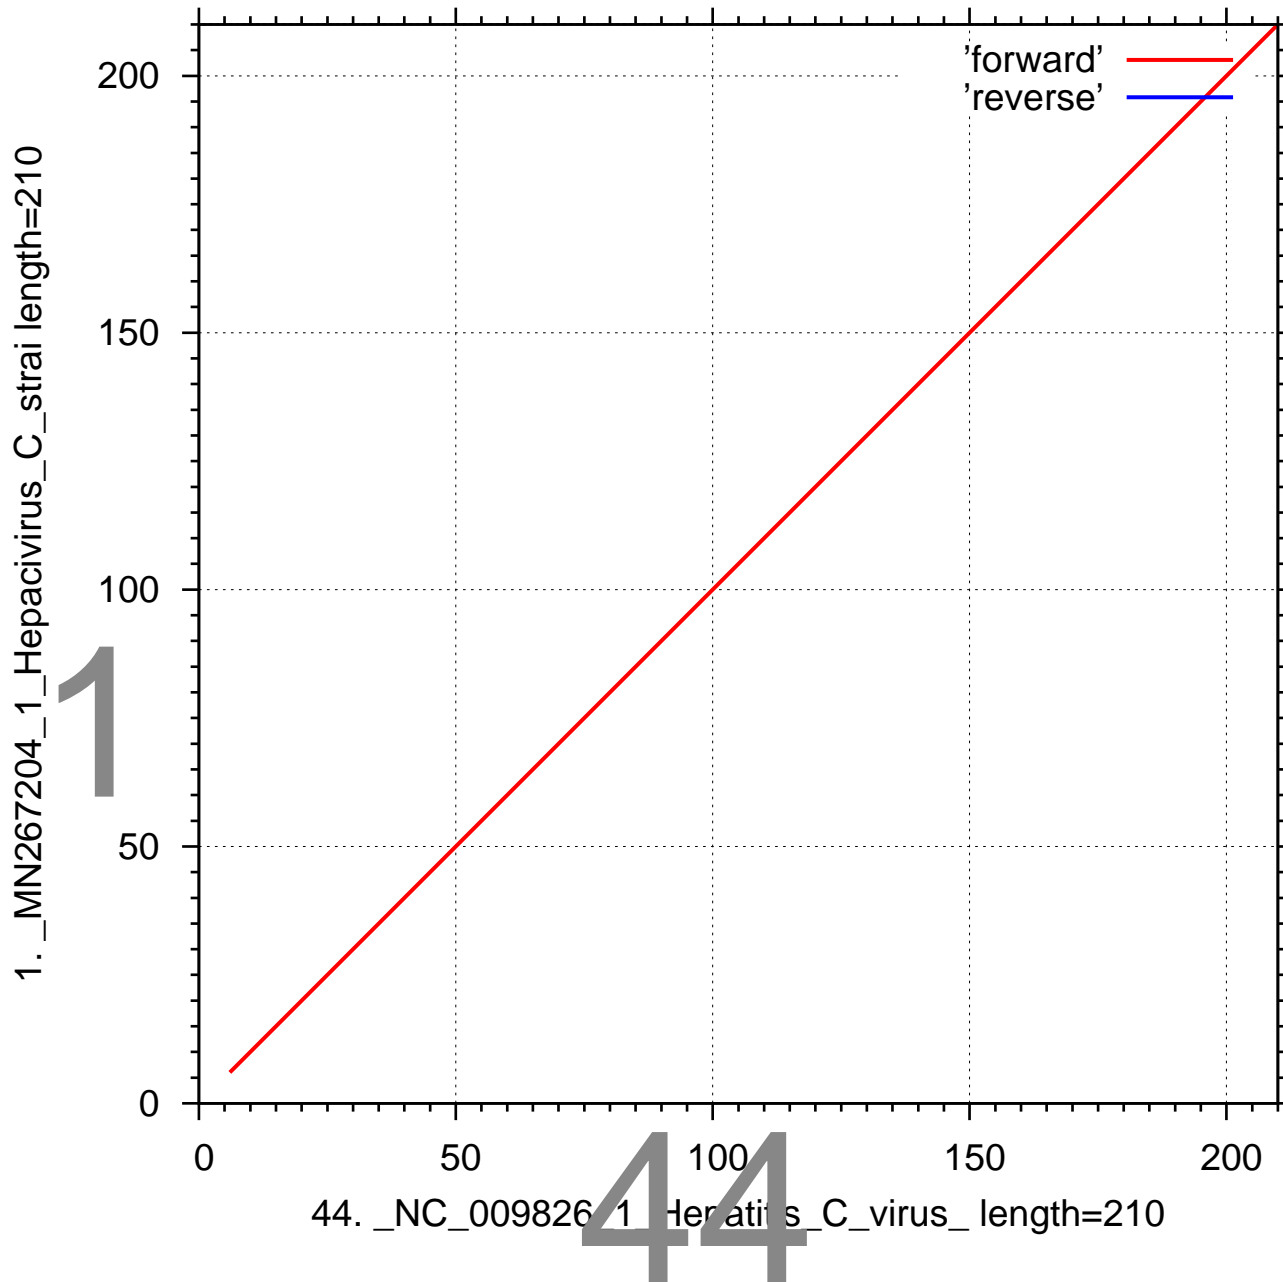

Threshold = 39

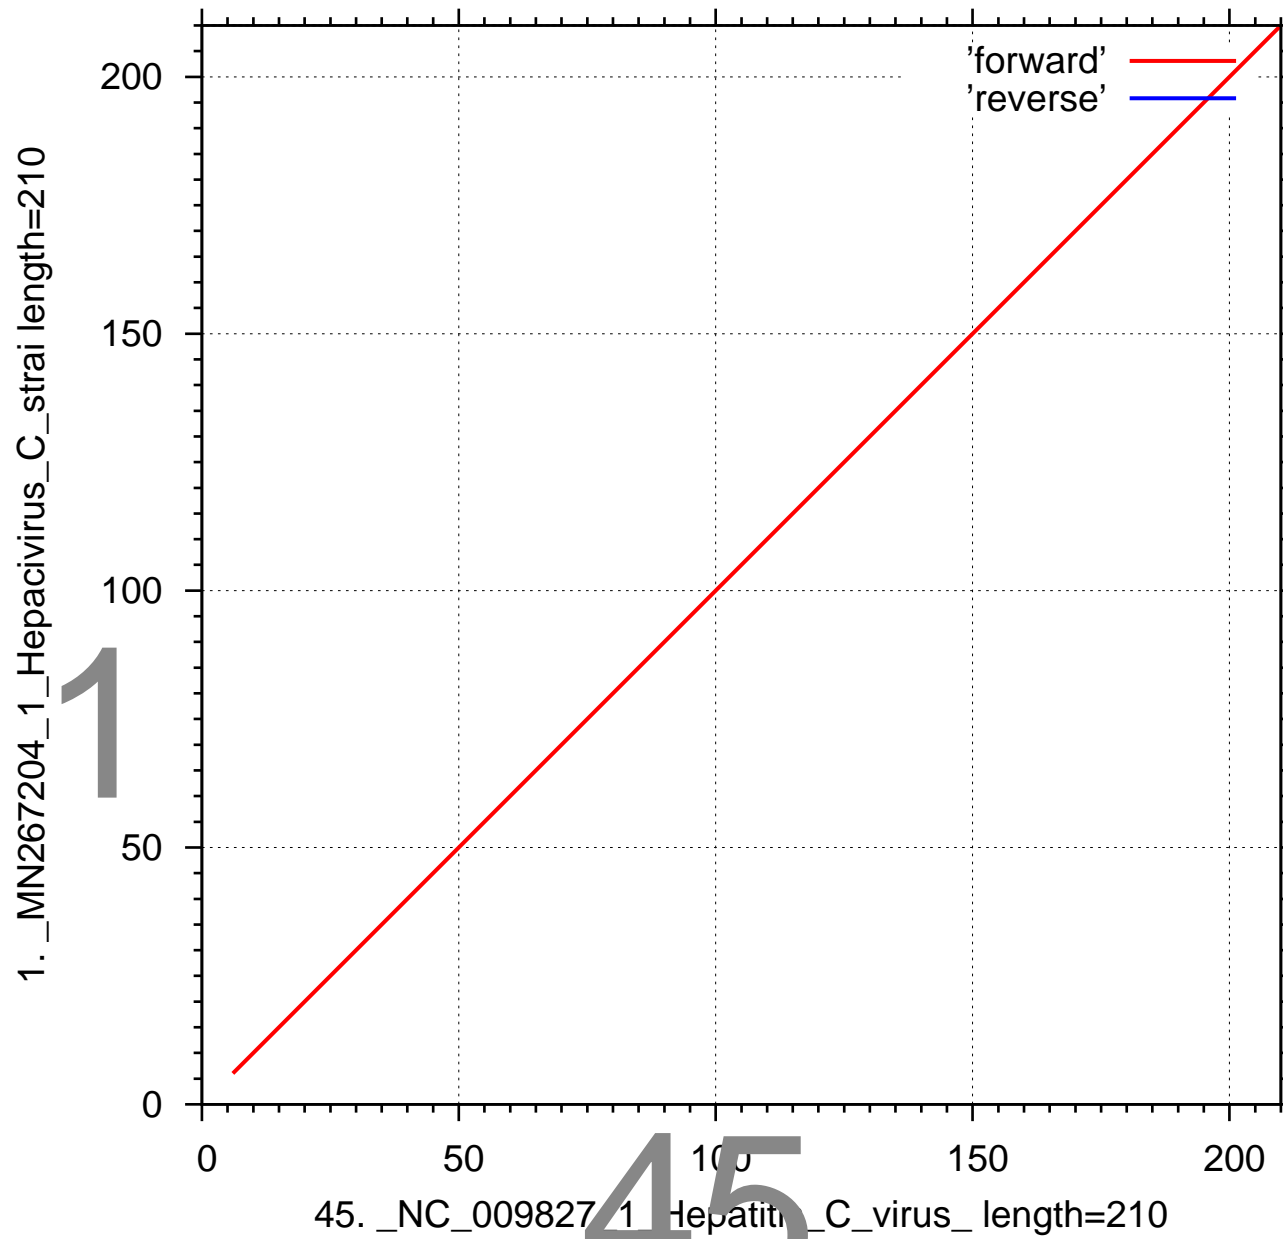

Threshold = 39

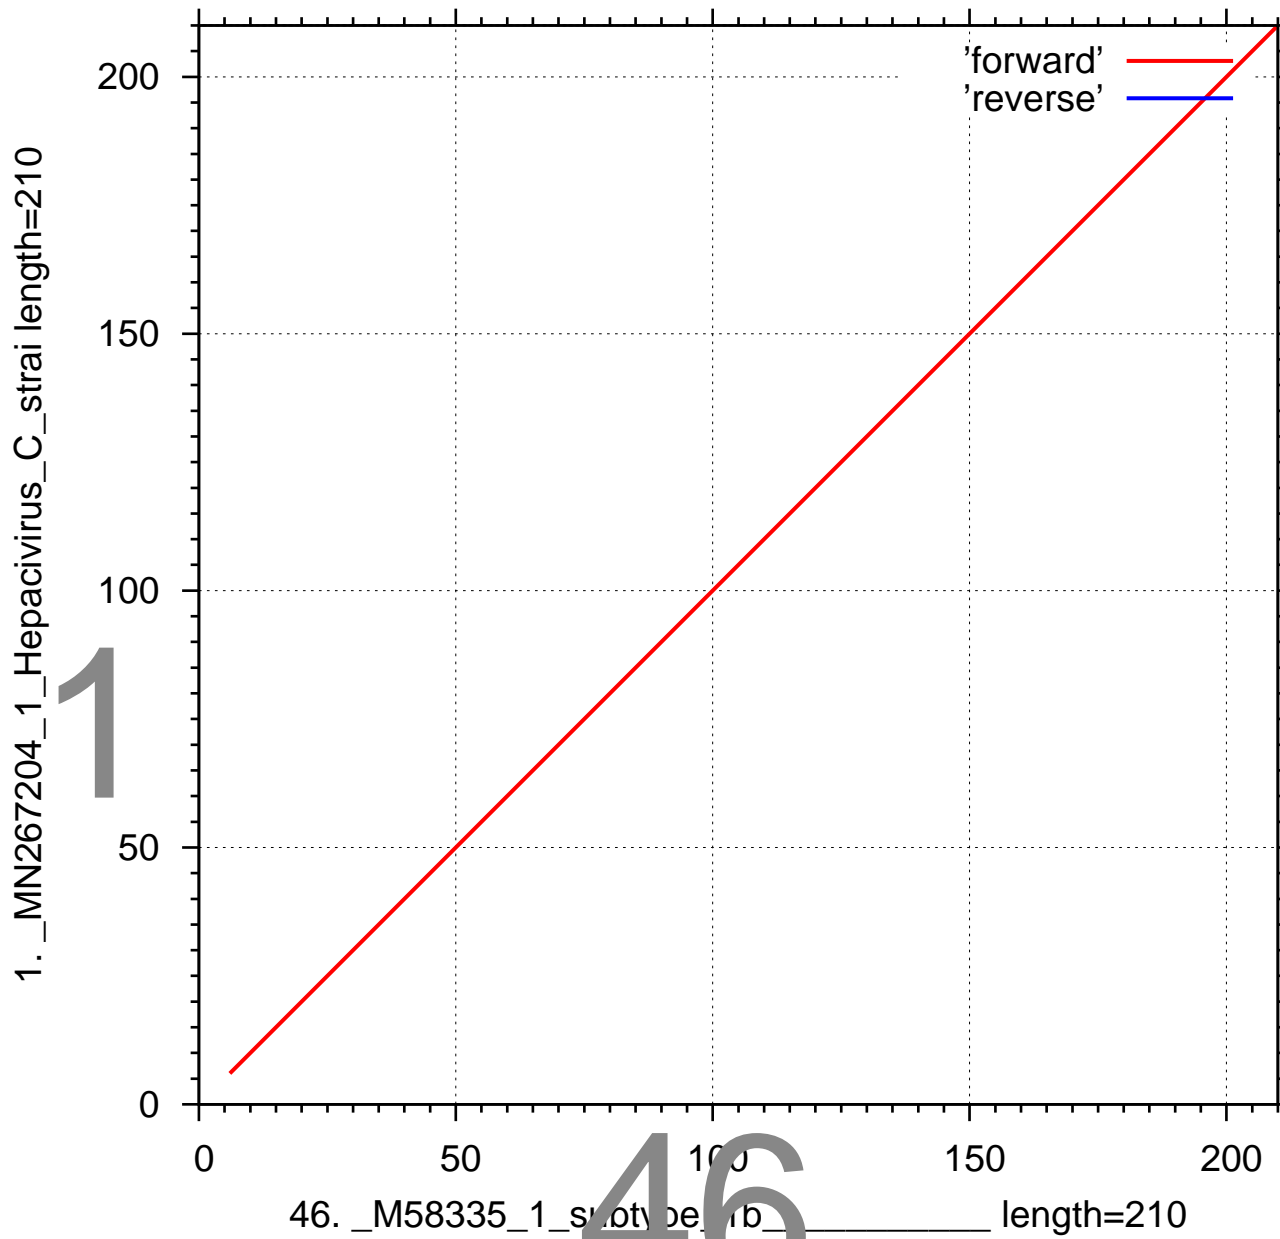

Threshold = 39

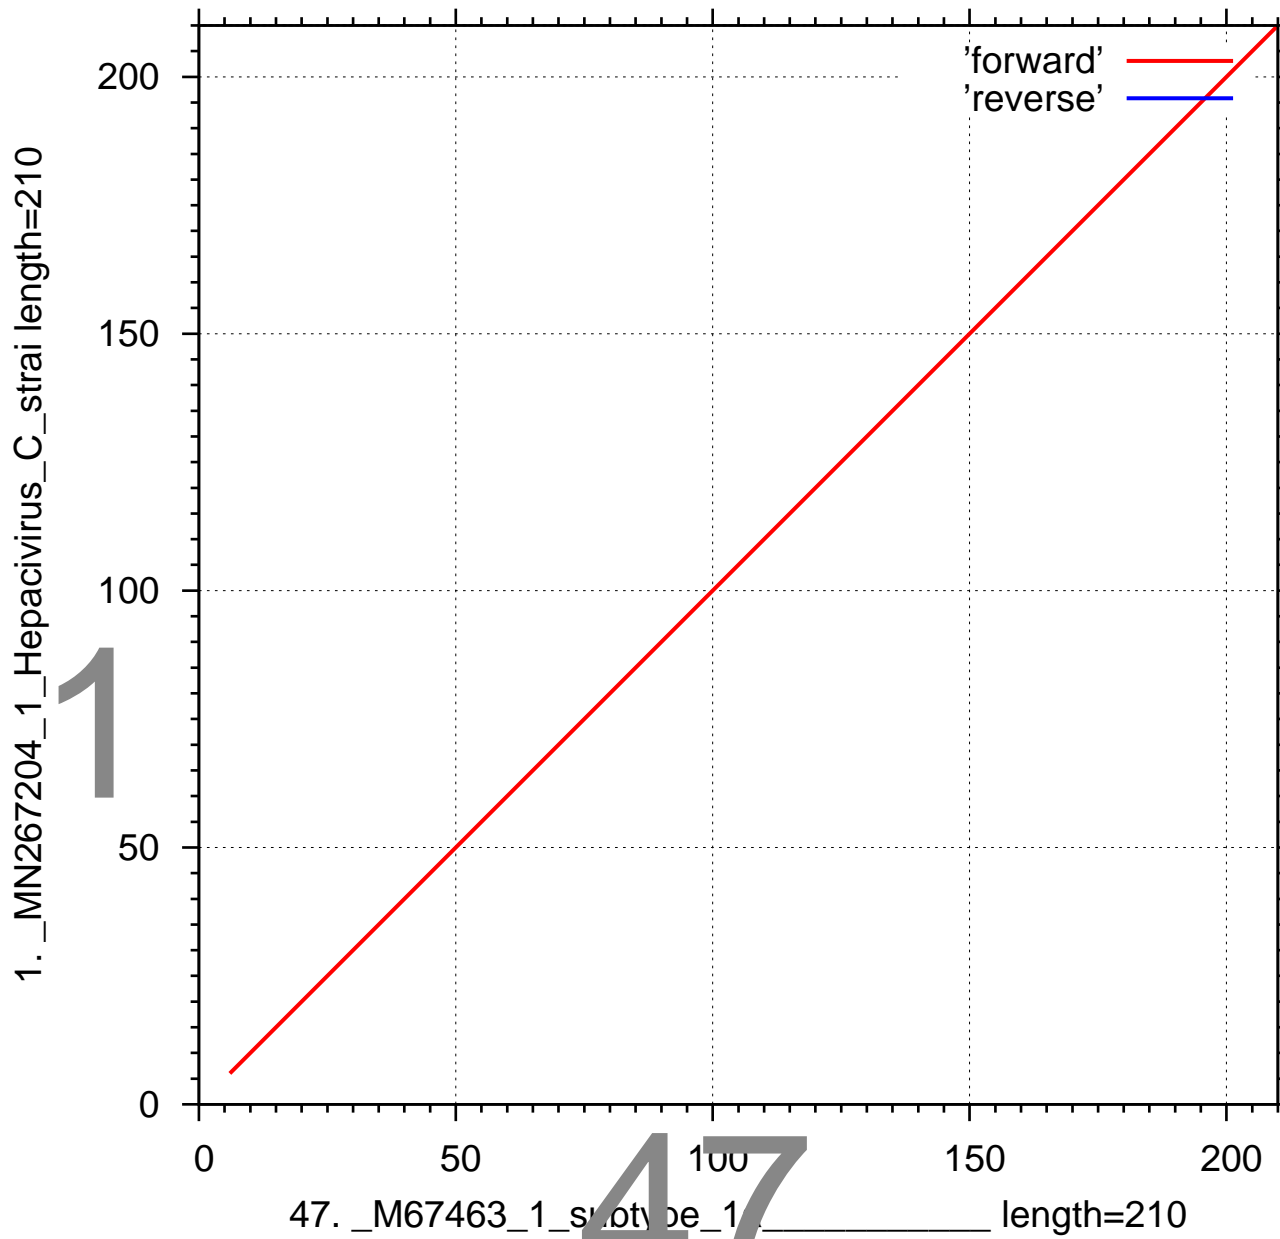

Threshold = 39

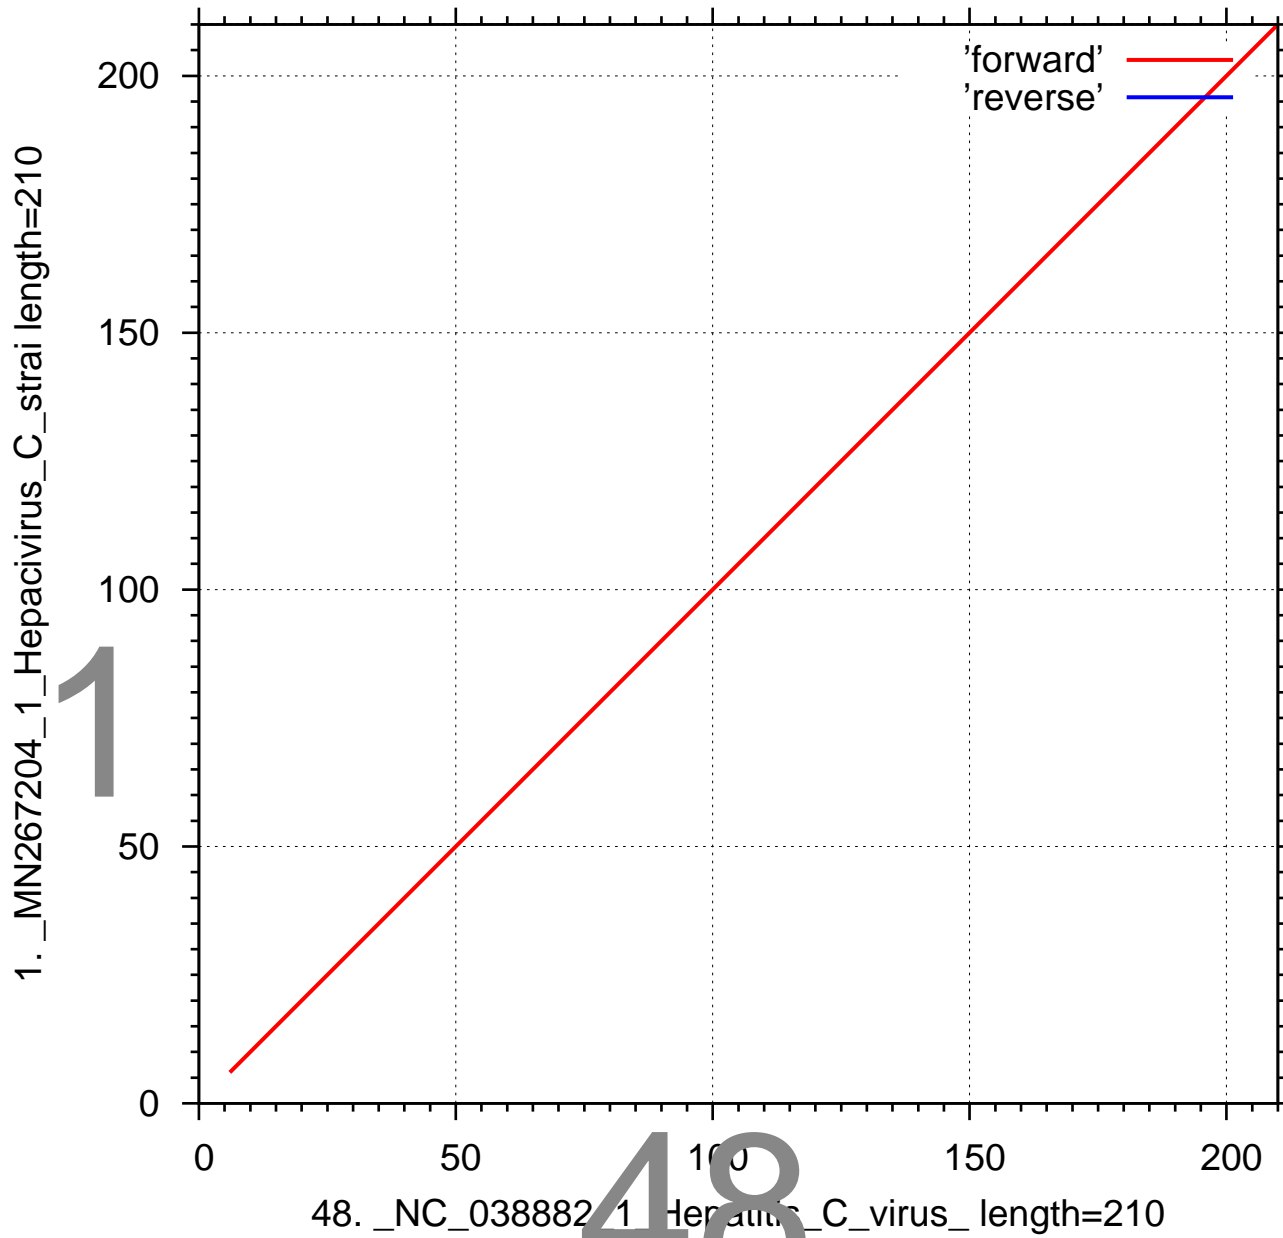



Threshold = 39

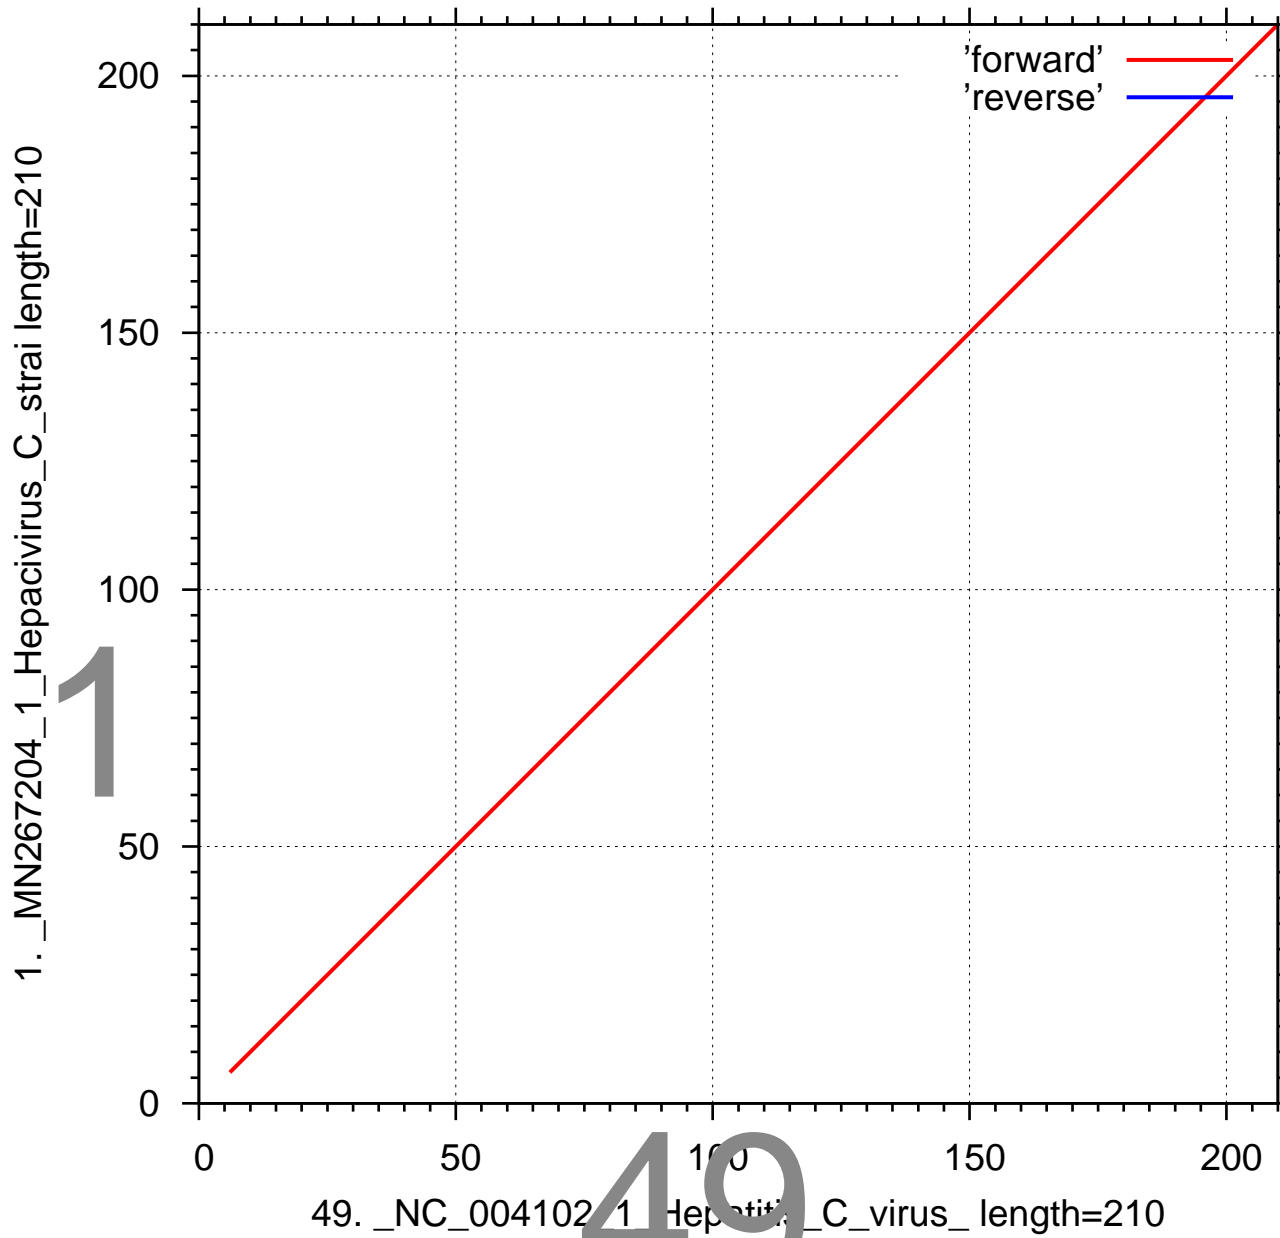

Threshold = 39

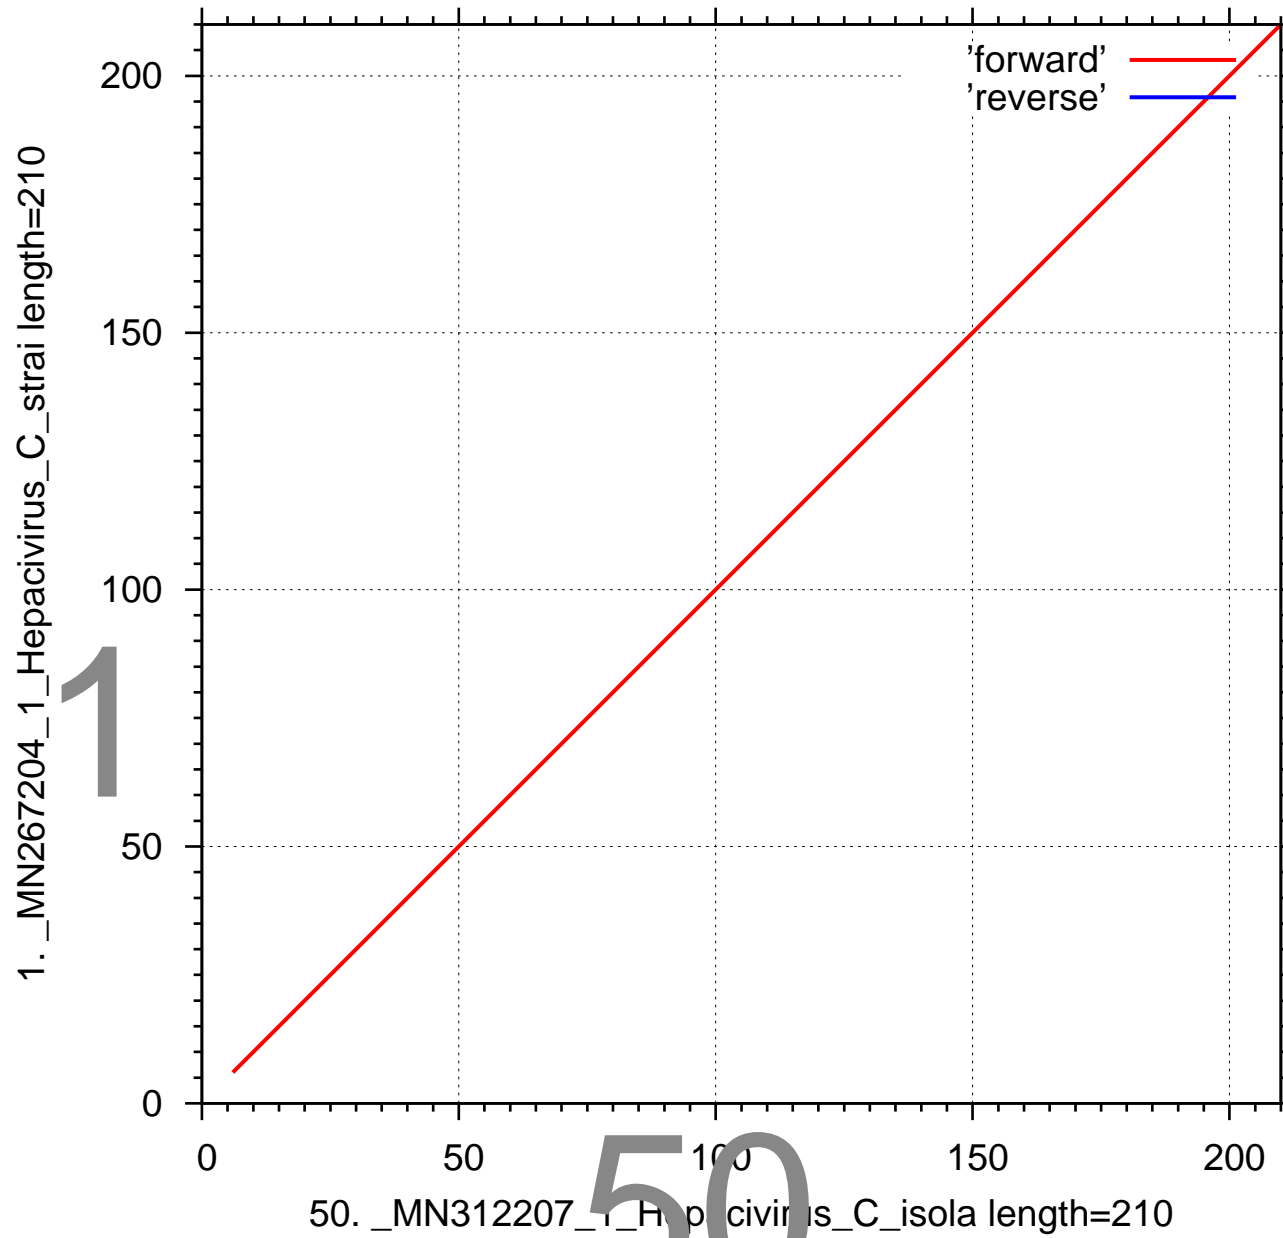

Supplement: 41598_2024_59342_MOESM2_ESM.pdf [file 41598_2024_59342_MOESM2_ESM.pdf]
