# Supplementary material for: Determination of hepatitis C virus subtype prevalent in Sindh, Pakistan: a phylogenetic analysis
Source: PubMed Central journal article supplement (PMC11096182; doi:10.1038/s41598-024-59342-7), 2024-05-15
Supplement: 41598_2024_59342_MOESM1_ESM.pdf [file 41598_2024_59342_MOESM1_ESM.pdf]

## HCV ELISA

Negative control Absorbance=0.025, 0.159

Blank Absorbance=0.0025

Positive control values=4.000, 4.000

Calculation of Negative Control=  $\frac{0.025+0.159}{2} = 0.092$

Calculation of the Cut-off: (C.O) = 0.092+ 0.12= **0.212**

### Interpretation Key:

| Negative Results                                                                  | Positive Results                                                                                 | Borderline                                                                                                      |
|-----------------------------------------------------------------------------------|--------------------------------------------------------------------------------------------------|-----------------------------------------------------------------------------------------------------------------|
| (A/ C.O. < 1): Specimens giving absorbance less than Cut-off values are negative. | (A/ C.O. ≥ 1): Specimens giving absorbance equal to or greater than Cut-off values are negative. | (A/ C.O. = 0.9- 1.1): Specimens with absorbance to Cut-off ratio between 0.9 and 1.1 are considered borderline. |

**Result Key: Values > 15= +++, > 10= ++ and < 10= +**

| S. # | Sample # | Results | Interpretation |
|------|----------|---------|----------------|
| 1.   | 1        | 13.18   | ++             |
| 2.   | 2        | 18.86   | +++            |
| 3.   | 3        | 18.43   | +++            |
| 4.   | 4        | 18.86   | +++            |
| 5.   | 5        | 18.86   | +++            |
| 6.   | 6        | 15.96   | ++             |
| 7.   | 7        | 18.86   | +++            |
| 8.   | 9        | 17.95   | +++            |
| 9.   | 10       | 18.86   | +++            |
| 10.  | 11       | 18.86   | +++            |
| 11.  | 13       | 18.86   | +++            |
| 12.  | 14       | 18.86   | +++            |
| 13.  | 15       | 18.86   | +++            |
| 14.  | 16       | 18.86   | +++            |
| 15.  | 17       | 18.44   | +++            |
| 16.  | 20       | 16.61   | +++            |
| 17.  | 21       | 17.15   | +++            |
| 18.  | 24       | 18.33   | +++            |
| 19.  | 25       | 18.45   | +++            |
| 20.  | 26       | 18.12   | +++            |
| 21.  | 27       | 18.62   | +++            |
| 22.  | 28       | 18.33   | +++            |
| 23.  | 29       | 18.86   | +++            |
| 24.  | 30       | 18.86   | +++            |

|     |    |       |     |
|-----|----|-------|-----|
| 25. | 32 | 15.47 | +++ |
| 26. | 34 | 17.02 | +++ |
| 27. | 35 | 18.20 | +++ |
| 28. | 36 | 15.00 | ++  |
| 29. | 38 | 13.60 | ++  |
| 30. | 39 | 18.05 | +++ |
| 31. | 42 | 17.66 | +++ |
| 32. | 43 | 18.86 | +++ |
| 33. | 45 | 16.90 | +++ |
| 34. | 46 | 17.16 | +++ |
| 35. | 47 | 15.00 | ++  |
| 36. | 48 | 14.42 | ++  |
| 37. | 49 | 17.99 | +++ |
| 38. | 50 | 17.96 | +++ |
| 39. | 52 | 17.86 | +++ |
| 40. | 53 | 18.86 | +++ |
| 41. | 54 | 18.86 | +++ |
| 42. | 55 | 18.86 | +++ |
| 43. | 56 | 18.41 | +++ |
| 44. | 57 | 14.15 | ++  |
| 45. | 58 | 18.29 | +++ |
| 46. | 59 | 10.09 | +   |
| 47. | 60 | 15.56 | +++ |
| 48. | 61 | 12.11 | ++  |
| 49. | 62 | 18.63 | +++ |
| 50. | 64 | 16.72 | +++ |
| 51. | 65 | 7.98  | +   |
| 52. | 67 | 18.86 | +++ |
| 53. | 68 | 16.20 | +++ |
| 54. | 69 | 13.46 | ++  |
| 55. | 71 | 12.58 | ++  |
| 56. | 72 | 16.74 | +++ |
| 57. | 73 | 18.86 | +++ |
| 58. | 75 | 13.87 | ++  |
| 59. | 76 | 16.26 | +++ |
| 60. | 77 | 18.20 | +++ |
| 61. | 78 | 14.49 | ++  |
| 62. | 79 | 10.20 | +   |
| 63. | 82 | 17.35 | +++ |
| 64. | 89 | 9.51  | +   |
| 65. | 44 | 17.90 | +++ |
| 66. | 93 | 17.02 | +++ |
| 67. | 90 | 16.55 | +++ |
| 68. | 12 | 17.68 | +++ |
| 69. | 13 | 18.86 | +++ |

|     |    |       |     |
|-----|----|-------|-----|
| 70. | 14 | 16.69 | +++ |
| 71. | 15 | 14.95 | ++  |
| 72. | 16 | 17.21 | +++ |
| 73. | 17 | 18.01 | +++ |
| 74. | 18 | 8.36  | +   |
| 75. | 19 | 11.67 | ++  |
| 76. | 20 | 15.97 | +++ |
| 77. | 21 | 16.70 | +++ |
| 78. | 22 | 18.86 | +++ |
| 79. | 23 | 17.21 | +++ |
| 80. | 24 | 13.59 | ++  |
| 81. | 26 | 18.66 | +++ |
| 82. | 28 | 18.86 | +++ |
| 83. | 29 | 17.29 | +++ |
| 84. | 30 | 18.86 | +++ |
| 85. | 31 | 17.39 | +++ |
| 86. | 32 | 16.45 | +++ |
| 87. | 33 | 17.08 | +++ |
| 88. | 40 | 18.50 | +++ |
| 89. | 35 | 18.86 | +++ |
